# Supplementary material for: Incidence, Mortality and Positive Predictive Value of Type 1 Cardiorenal Syndrome in Acute Coronary Syndrome
Source: PLoS One. 2016 Dec 1;11(12):e0167166. doi: 10.1371/journal.pone.0167166 (PMC5132196; doi:10.1371/journal.pone.0167166)
Supplement: S1 Materials — (XLS) [file pone.0167166.s001.xls]

## Sheet: P-O database
Patientcode	Age	Sex	Weight	Height	BMI	Obesity	Tobaquism	Alcoholism	HTA	Diabetes	CKD	creatinine	Worstcreatine	WRF	Anemia	PerifVasDis	AKI	AHF	COPD	ictus	PrevCorDis	Prevrevasc	Hb	Troponine	Dyslipemia	Hyponatremia	ACS	Q_wave_infarction	Killip	VEJECTFRACTIO	LEFTVENTRDISFUNCT	WORSTEJECTFRACT	Revascularization	Stent	Revascompl	Exitus	Daysinhospital	Exitusseguim	TimeReing	Readmissionexitus	timereadmexit	CRS1	CRS1_severity
1	81	0	80	165	29.3848	0	0	0	0	0	0	0.7	0.9	0.2	1	0	0	0	0	1	1	1	11.2	1	0	2	1	1	1	1	0	45	2	1	2	0	40	0	0	0	365	0	0
2	59	0	61	147	28.229	0	2	0	0	0	0	0.56	0.8	0.24	0	0	0	0	0	0	5	5	14.3	1	1	2	2	0	1	1	0	60	0	0	0	0	8	0	0	0	365	0	0
3	78	0	52	144	25.0772	0	0	0	0	0	0	0.59	0.7	0.11	0	0	0	0	0	0	1	1	14.2	1	0	2	2	0	1	1	0	65	2	2	1	0	6	0	0	0	365	0	0
4	57	0	48	152	20.7756	0	2	0	1	2	0	0.5	0.6	0.1	0	0	0	0	0	0	1	1	12.2	1	1	2	2	0	1	1	0	65	1	0	1	0	5	0	0	0	365	0	0
5	51	1	78	165	28.6501	0	2	0	0	0	0	0.67	1	0.33	0	0	1	0	0	0	1	1	13.7	1	1	2	2	0	1	1	0	0	2	2	1	0	5	0	0	0	365	1	0
6	64	0					0	0	1	1	0	1.2	1.3	0.1	1	0	0	1	0	0	1	1	9.3	1	0	2	1	1	4	0		0	1	0	2	1	1	0	0	1	1	2	0
7	77	1	72	166	26.1286	0	1	0	1	0	0	0.8	0.8	0	0	0	0	0	0	0	4	1	15	1	0	2	3	0	1	1	0	65	2	2	1	0	7	0	0	0	365	0	0
8	77	1	80	170	27.6817	0	0	0	0	2	0	1.3	1.7	0.4	0	0	1	1	1	0	4	3	14.9	1	0	1	2	0	3	2	1	40	1	0	0	0	16	1	70	1	70	3	3
9	67	0	85	153	36.3108	1	0	0	1	2	0	0.57	0.9	0.33	0	0	1	0	0	0	1	1	14	1	1	2	2	0	1	1	0	63	3	0	1	0	38	0	0	0	365	1	0
10	54	0	56	157	22.719	0	2	0	0	0	0	0.4	0.74	0.34	0	0	1	0	0	0	1	1	13	1	0	1	1	1	1	1	0	50	3	0	1	0	38	0	0	0	365	1	0
11	65	1	62	167	22.231	0	0	0	0	0	0	0.9	1.4	0.5	0	0	1	0	0	0	1	1	13.8	1	1	2	1	1	1	1	0	50	2	2	2	0	5	0	0	0	365	1	0
12	73	1	88	177	28.089	0	1	0	0	2	0	0.7	0.83	0.13	0	1	0	0	0	0	1	1	15.2	1	1	2	2	0	1	1	0	66	2	2	1	0	24	0	0	0	365	0	0
13	74	0	50	150	22.2222	0	0	0	1	0	0	0.6	0.9	0.3	1	0	1	0	0	0	1	1	11.9	0	1	2	3	0	1	1	0	70	3	0	1	0	19	0	0	0	365	1	0
14	69	0	84	155	34.9636	1	0	0	0	0	0	0.8	1	0.2	0	0	0	0	0	0	1	1	12.8	0	1	2	3	0	1	1	0	78	3	0	1	0	21	0	0	0	365	0	0
15	66	1	75	171	25.6489	0	2	2	1	0	0	0.7	1	0.3	1	0	1	0	0	0	1	1	11.6	1	1	2	1	1	1	1	0	0	2	2	1	0	5	1	0	1	183	1	0
16	75	1					0	0	1	2	0	0.9	0.9	0	0	0	0	0	0	0	1	1	15	0	1	2	3	0	1	1	0	65	2	0	2	0	4	0	0	0	365	0	0
17	63	0	73	172	24.6755	0	0	0	1	0	0	0.8	1	0.2	0	0	0	0	0	0	1	1	14.5	0	1	2	3	0	1	1	0	50	2	2	1	0	4	0	0	0	365	0	0
18	64	1	80	176	25.8264	0	0	0	0	0	0	0.7	0.9	0.2	1	0	0	0	0	0	1	1	12.7	1	1	1	1	1	1	2	1	35	2	1	1	0	10	0	0	0	365	0	0
19	71	1					2	2	1	2	1	1	1.6	0.6	0	1	1	0	0	0	1	1	15	1	1	1	2	0	1	3	1	25	1	0	0	0	8	1	0	0	365	1	0
20	31	1	82	179	25.5922	0	2	0	0	0	0	0.99	1.1	0.11	0	0	0	0	0	0	1	1	15	1	0	2	2	0	1	1	0	0	1	0	0	0	6	0	0	0	365	0	0
21	65	0	63	160	24.6094	0	2	0	0	2	0	0.6	0.8	0.2	0	0	0	0	0	0	1	1	15	1	1	1	2	0	1	1	0	65	2	2	1	0	11	0	0	0	365	0	0
22	74	0	71	156	29.1749	0	0	0	1	0	0	0.8	0.8	0	0	0	0	0	0	0	1	1	15	0	0	2	3	0	1	2	1	35	3	0	0	0	7	0	0	0	365	0	0
23	53	1	85	180	26.2346	0	2	0	0	0	0	1	1.23	0.23	0	0	0	0	0	0	1	1	15.1	1	0	2	2	0	1	1	0	72	2	1	1	0	4	0	0	0	365	0	0
24	81	0					0	0	1	2	0	0.97	1.3	0.33	1	0	1	0	0	1	1	1	9.6	1	1	2	2	0	1	1	0	0	1	0	2	0	12	0	0	0	365	1	0
25	73	1					1	0	1	0	0	1	1.1	0.1	0	1	0	0	0	0	3	3	14	0	0	2	3	0	1	1	0	55	1	0	0	0	7	0	0	0	365	0	0
26	61	1	69	166	25.0399	0	2	0	1	0	0	1.1	1.3	0.2	0	0	0	0	0	0	1	1	14.9	1	0	2	1	1	1	1	0	60	2	1	2	0	12	0	0	0	365	0	0
27	65	0	87	157	35.2955	1	0	0	1	2	0	0.5	0.8	0.3	0	0	1	0	0	0	1	1	12.1	0	1	2	3	0	1	1	0	65	2	2	1	0	7	0	0	0	365	1	0
28	72	1	77	167	27.6095	0	2	2	1	2	1	1.3	3	1.7	1	0	1	1	0	0	5	1	10.4	1	1	2	1	1	3	2	1	35	2	0	2	1	4	0	0	1	4	3	4
29	65	1	60	165	22.0386	0	2	0	0	0	0	0.6	0.79	0.19	0	0	0	0	0	0	1	1	14.1	1	0	2	1	1	1	1	0	60	2	1	1	0	11	0	0	0	365	0	0
30	47	0	80	168	28.3447	0	2	0	0	0	0	0.76	0.9	0.14	0	0	0	0	0	0	1	1	13.5	1	0	2	1	1	1	1	0	65	2	2	1	0	8	0	0	0	365	0	0
31	63	0	78	150	34.6667	1	0	0	1	2	0	0.9	1.2	0.3	0	0	0	0	0	0	1	1	14.1	1	1	2	1	1	1	2	1	35	2	2	1	0	23	0	32	1	32	0	0
32	56	1	75	166	27.2173	0	2	0	1	0	0	1	1.2	0.2	0	0	0	0	0	0	1	1	15	1	0	2	2	0	1	1	0	50	2	2	1	0	5	0	0	0	365	0	0
33	71	0	72	154	30.3593	1	0	0	0	0	0	0.3	0.8	0.5	0	1	1	0	0	0	1	1	13	0	1	2	3	0	1	1	0	0	3	0	1	0	53	0	0	0	365	1	0
34	64	0	67				0	0	0	0	0	0.7	0.86	0.16	0	0	0	0	0	0	1	1	17.3	0	0	2	3	0	1	1	0	65	1	0	1	0	2	0	13	1	13	0	0
35	79	1	81	177	25.8546	0	0	0	1	2	0	0.7	1	0.3	1	1	1	1	0	0	3	4	10.1	1	0	1	2	0	3	1	0	60	2	2	1	0	26	1	0	0	365	3	3
36	48	1	93	174	30.7174	1	1	0	1	0	0	0.93	1	0.07	0	0	0	0	0	0	1	1	14.5	0	1	2	3	0	1	1	0	0	2	2	1	0	7	0	0	0	365	0	0
37	71	1	73	162	27.8159	0	1	0	0	2	0	0.86	1.4	0.54	1	0	1	0	1	0	1	1	12	0	0	2	1	1	1	1	0	45	2	1	2	0	13	0	62	1	62	1	0
38	65	1	62	166	22.4996	0	0	0	1	2	0	0.84	0.9	0.06	0	0	0	0	0	0	1	1	13.6	0	0	2	3	0	1	1	0	66	1	0	0	0	2	0	189	1	189	0	0
39	57	1	85	170	29.4118	0	1	0	0	0	0	0.76	1.1	0.34	0	0	1	0	0	0	1	1	16	0	0	2	3	0	1	1	0	70	2	2	1	0	7	0	0	0	365	1	0
40	64	0					2	0	1	2	0	0.98	1.3	0.32	0	0	1	0	0	1	2	3	13.8	1	1	2	2	0	1	1	0	52	1	0	2	0	14	0	0	0	365	1	0
41	54	0	77	159	30.4577	1	1	0	1	0	0	0.8	1.2	0.4	0	0	1	0	0	0	1	1	13.6	1	1	2	2	0	1	1	0	65	2	1	1	0	9	0	0	0	365	1	0
42	53	1	106	185	30.9715	1	2	0	1	2	0	0.86	1.1	0.24	0	0	0	0	0	0	1	1	17	1	1	2	1	1	1	1	0	65	2	2	1	0	6	0	0	0	365	0	0
43	52	0	77	150	34.2222	1	0	0	1	2	1	1.9	2.39	0.49	1	0	1	1	0	0	1	1	11.6	0	1	2	3	0	2	1	0	70	2	2	2	0	10	0	0	0	365	3	4
44	60	1	83	171	28.3848	0	0	0	1	0	0	0.63	1	0.37	0	0	1	0	0	0	1	1	15.2	1	0	2	2	0	1	1	0	65	2	1	1	0	3	0	0	0	365	1	0
45	52	1	75	170	25.9516	0	0	0	0	2	0	0.7	0.9	0.2	0	0	0	0	0	0	1	1	15	1	1	2	1	1	1	1	0	68	2	1	1	0	7	0	189	1	189	0	0
46	81	0					0	0	1	0	0	1.9	2.1	0.2	1	0	0	0	0	0	1	1	10	1	1	2	1	1	1	1	0	50	1	0	0	0	6	0	0	0	365	0	0
47	76	0	68	156	27.9421	0	0	0	1	2	0	0.7	1	0.3	1	1	1	0	0	1	1	1	11.4	1	0	1	1	1	1	3	1	25	3	0	1	0	29	0	45	1	45	1	0
48	55	0	75	159	29.6665	0	0	2	1	0	0	0.6	0.7	0.1	0	0	0	0	0	0	1	1	13.2	1	1	2	1	1	1	1	0	65	1	0	2	0	9	0	0	0	365	0	0
49	46	1	109	160	42.5781	1	0	0	1	2	0	0.8	1.3	0.5	0	0	1	1	0	1	1	1	13.3	1	1	2	1	1	3	2	1	35	1	0	2	0	16	1	85	1	85	3	4
50	64	1	62	163	23.3355	0	2	0	0	0	0	0.7	0.8	0.1	0	0	0	0	0	0	1	1	15.6	1	1	2	2	0	1	1	0	65	1	0	2	0	5	0	0	0	365	0	0
51	51	0	78	165	28.6501	0	2	0	1	0	0	0.73	1.1	0.37	1	0	1	0	0	0	1	1	11.5	1	0	2	2	0	1	1	0	58	2	2	1	0	5	0	0	0	365	1	0
52	76	0	69	172	23.3234	0	1	0	1	0	0	1	2	1	0	0	1	0	0	0	1	1	13	1	0	2	2	0	1	2	1	40	2	2	1	0	8	0	0	0	365	1	0
53	63	1	79	172	26.7036	0	2	0	0	0	0	0.9	1	0.1	0	0	0	0	0	0	1	1	16	0	1	2	3	0	1	1	0	0	1	0	0	0	19	0	0	0	0	0	0
54	71	0	80	164	29.7442	0	0	0	1	0	0	0.9	1.1	0.2	0	0	0	0	0	0	2	1	12.1	1	0	2	1	1	1	1	0	45	1	0	2	0	13	0	0	0	365	0	0
55	74	1	86	167	30.8365	1	1	0	0	2	0	1.1	1.4	0.3	0	0	0	1	0	0	1	1	18.2	0	0	1	3	0	2	1	0	45	2	1	1	0	12	1	0	0	365	2	0
56	64	0	101	145	48.038	1	0	0	1	2	0	0.76	1	0.24	1	0	0	0	0	0	4	3	13.4	0	1	2	3	0	1	1	0	57	1	0	2	0	7	0	0	0	365	0	0
57	74	1	98	186	28.327	0	2	2	0	0	0	0.9	1.2	0.3	0	0	0	0	0	0	1	1	15.3	0	0	2	3	0	1	1	0	0	2	2	1	0	11	0	0	0	365	0	0
58	51	0	55	161	21.2183	0	2	0	0	0	0	0.55	0.8	0.25	1	0	0	0	0	0	1	1	11	1	0	2	1	1	1	1	0	55	1	0	2	0	7	0	0	0	365	0	0
59	75	1					1	0	1	0	0	1	1.1	0.1	0	0	0	0	0	0	1	1	14	0	0	2	3	0	1	1	0	70	1	0	0	0	6	0	0	0	365	0	0
60	81	1	65	166	23.5883	0	2	0	0	0	0	0.9	1	0.1	0	0	0	0	0	0	1	1	14	0	1	2	3	0	1	1	0	65	1	0	2	0	11	0	0	0	365	0	0
61	82	1					1	0	0	2	0	1	1.2	0.2	0	0	0	1	0	1	1	1	13.3	1	1	1	1	1	4	0		0	1	0	0	1	1	0	0	1	1	2	0
62	63	1	75	164	27.8852	0	0	0	1	2	0	0.7			0	0	0	0	0	1	2	1	15	0	1	2	3	0	1	1	0	0	2	1	1	0	7	0	0	0	365	0	0
63	56	1	74	162	28.1969	0	2	0	0	0	0	0.6	1.4	0.8	0	0	1	0	0	0	1	1	16.5	1	0	1	1	1	1	2	1	35	2	1	1	0	3	0	0	0	365	1	0
64	76	1	90	164	33.4622	1	0	0	1	2	1	1.6	4.7	3.1	1	0	1	1	0	0	1	1	9.2	1	1	2	2	0	2	2	1	35	3	0	1	0	25	0	8	1	8	3	4
65	58	1	62	175	20.2449	0	2	0	0	0	0	0.6	1	0.4	0	0	1	0	0	0	2	1	15.02	1	1	2	1	1	1	1	0	45	2	2	1	0	5	0		0	0	1	0
66	43	1					2	2	0	0	0	0.8	1.1	0.3	0	0	1	0	0	0	1	1	15.2	1	0	1	1	1	1	1	0	65	2	0	1	0	7	0	0	0	365	1	0
67	67	1	57	160	22.2656	0	2	2	0	0	0	0.6	0.84	0.24	0	0	0	0	0	0	1	1	15.1	1	0	2	2	0	1	1	0	60	2	2	1	0	6	0	0	0	365	0	0
68	68	1	75	165	27.5482	0	1	0	1	2	0	0.9	0.9	0	0	0	0	0	0	0	2	1	13.8	1	1	2	2	0	1	1	0	45	3	0	1	0	25	0	0	0	365	0	0
69	80	0	84	160	32.8125	1	0	0	1	0	0	0.59	0.7	0.11	0	0	0	0	0	0	1	1	15	0	1	2	3	0	1	1	0	79	1	0	0	0	1	0	0	0	365	0	0
70	74	0	70	147	32.3939	1	1	0	1	0	0	1	2.1	1.1	0	0	1	0	0	0	2	2	14.4	1	1	2	2	0	1	1	0	65	1	0	0	0	9	0	0	0	37	1	0
71	57	1	110	171	37.6184	1	2	0	1	0	0	0.6	0.7	0.1	0	0	0	0	0	0	1	1	15.2	1	1	2	1	1	1	1	0	60	2	1	1	0	8	0	0	0	365	0	0
72	73	0	82	153	35.0293	1	0	0	1	2	0	1.1	1.7	0.6	0	0	1	0	0	0	1	1	13	0	1	2	3	0	1	1	0	65	3	0	1	0	7	0	0	0	365	1	0
73	62	1	120	176	38.7397	1	1	0	1	2	1	1.4	1.9	0.5	0	0	1	0	0	0	2	2	15.6	1	1	1	1	1	1	1	0	60	2	2	1	0	9	0	0	0	365	1	0
74	74	1	80	175	26.1224	0	0	2	1	2	0	0.9	1.2	0.3	0	0	0	0	0	0	1	1	15.2	1	1	2	1	1	1	1	0	55	2	2	1	0	8	0	0	0	365	0	0
75	80	1	85	180	26.2346	0	1	0	1	2	0	1.2	1.5	0.3	1	1	1	1	1	0	1	1	10.6	1	0	1	2	0	3	3	1	30	1	0	2	1	3	0	0	1	3	3	3
76	68	1	80	177	25.5354	0	2	0	1	0	0	0.7	1.6	0.9	1	0	1	1	0	0	1	1	12.6	1	1	1	1	1	4	1	0	45	2	2	1	0	29	0	0	0	365	3	4
77	44	1	63	157	25.5588	0	2	0	0	0	0	0.7	1	0.3	0	0	1	0	0	0	1	1	14.4	1	0	2	1	1	1	1	0	45	3	0	1	0	44	0	0	0	365	1	0
78	72	1	81	165	29.7521	0	1	0	1	0	0	0.9	1	0.1	0	0	0	0	0	0	1	1	15.2	0	1	2	3	0	1	1	0	65	2	1	1	0	4	0	0	0	365	0	0
79	75	1	65	168	23.03	0	1	0	1	0	0	0.8	1	0.2	0	0	0	0	0	0	1	1	13.7	1	0	2	1	1	1	2	1	35	1	0	0	0	14	0	0	0	365	0	0
80	61	0	76	159	30.0621	1	0	0	1	2	0	0.6	0.8	0.2	1	0	0	0	0	0	1	1	11.5	0	1	2	3	0	1	1	0	60	2	2	2	0	11	0	0	0	365	0	0
81	64	1	70	165	25.7117	0	2	0	1	0	0	0.6	0.8	0.2	0	0	0	0	0	0	1	1	14	1	0	2	1	1	1	2	1	35	2	2	1	0	10	0	0	0	365	0	0
82	75	0	71	159	28.0843	0	0	0	1	0	0	0.8	1.4	0.6	0	0	1	0	0	0	1	1	15.6	1	0	2	1	1	1	1	0	55	2	0	1	0	14	0	296	1	296	1	0
83	63	0					0	0	1	0	0	0.6	0.65	0.05	0	0	0	0	0	0	1	1	13.1	0	0	2	3	0	1	1	0	60	0	0	0	0	5	0	0	0	365	0	0
84	74	0	85	165	31.2213	1	0	0	1	2	0	0.6	0.9	0.3	0	0	1	0	0	0	1	1	12	1	1	2	1	1	1	1	0	63	2	1	1	0	6	0	0	0	365	1	0
85	63	0	51	154	21.5045	0	2	0	0	0	0	0.5	0.7	0.2	0	0	0	0	0	0	1	1	12.3	1	1	2	2	0	1	1	0	0	3	0	1	0	36	0	0	0	365	0	0
86	46	1	95	177	30.3233	1	1	0	1	0	0	1.1	1.3	0.2	0	0	0	0	0	0	1	1	13.9	1	1	2	2	0	1	1	0	60	1	0	1	0	5	0	0	0	365	0	0
87	42	0	73	165	26.8136	0	2	0	0	0	0	0.6	0.7	0.1	0	0	0	0	0	0	1	1	13.5	1	1	2	2	0	1	1	0	0	1	0	1	0	2	0	0	0	365	0	0
88	61	1	102	174	33.6901	1	1	0	1	0	0	0.8	0.9	0.1	0	1	0	0	0	0	4	1	15.7	0	1	2	3	0	1	1	0	60	3	0	1	0	16	0	0	0	365	0	0
89	64	1	105	171	35.9085	1	1	0	1	2	0	0.89	1	0.11	1	0	0	0	0	0	2	2	12.7	0	1	2	3	0	1	0		0	2	0	0	0	14	0	0	0	365	0	0
90	88	0					0	0	1	0	0	1.04	1.5	0.46	0	0	1	1	0	0	1	1	13.8	1	0	2	2	0	2	3	1	25	1	0	2	0	8	0	0	0	365	3	4
91	56	0	68	155	28.3039	0	0	0	1	0	0	0.7	1	0.3	0	0	1	0	0	0	2	1	12.8	1	1	2	2	0	1	1	0	45	3	0	1	0	53	0	0	0	365	1	0
92	66	1	82	165	30.1194	1	2	0	0	2	0	0.9	1.1	0.2	0	0	0	0	0	0	1	1	14.9	0	1	2	3	0	1	1	0	0	2	2	2	0	9	0	0	0	365	0	0
93	80	1	53	150	23.5556	0	0	0	1	2	0	0.95	1.2	0.25	0	0	0	0	0	0	1		14	1	0	2	2	0	1	1	0	65	2	1	1	0	7	0	0	0	365	0	0
94	66	1	70	170	24.2215	0	1	1	0	2	0	0.7	1	0.3	0	0	1	1	0	0	3	3	14	1	1	2	2	0	2	0		0	3	0	1	0	6	0	0	0	365	3	3
95	72	1	83	173	27.7323	0	1	0	1	2	0	1	2.3	1.3	0	0	1	1	0	0	2	2	13.9	1	1	2	1	1	4	1	0	50	2	2	1	1	8	0	0	1	8	3	4
96	76	1	67	161	25.8478	0	1	1	0	0	0	0.8	1	0.2	0	1	0	0	0	0	2	2	15.1	1	1	2	1	1	1	1	0	45	2	1	2	0	6	1	0	0	365	0	0
97	77	1	84	173	28.0664	0	1	0	0	0	0	1.3	1.5	0.2	1	0	0	0	0	0	2	3	11.8	1	0	2	2	0	1	1	0	65	2	1	2	0	11	0	320	1	320	0	0
98	74	0	59	157	23.9361	0	0	0	1	2	0	0.86	1.03	0.17	1	0	0	0	0	1	3	5	11.1	0	1	2	3	0	1	1	0	70	1	0	0	0	8	0	0	0	365	0	0
99	55	0	68	165	24.977	0	2	0	0	0	0	0.5	0.7	0.2	0	1	0	0	0	0	1	1	12.3	1	0	2	1	1	1	1	0	60	2	2	1	0	9	0	0	0	365	0	0
100	65	0	76	152	32.8947	1	0	0	1	2	0	0.65	1	0.35	1	1	1	1	0	0	1	1	11.2	1	1	2	2	0	3	2	1	35	3	0	1	0	56	1	0	1	155	3	3
101	67	1	77	177	24.5779	0	2	0	0	0	0	1.09	1.2	0.11	0	0	0	0	0	0	1	1	15.3	0	1	2	3	0	1	1	0	56	2	1	2	0	5	0	0	0	365	0	0
102	53	0	76	159	30.0621	1	0	0	1	2	0	0.8	1	0.2	0	0	0	0	0	1	5	1	13	0	0	2	3	0	1	1	0	65	1	0	2	0	7	0	0	0	365	0	0
103	46	0	78	151	34.209	1	0	0	1	2	0	0.49	0.67	0.18	1	0	0	0	0	0	1	1	11.4	0	1	2	3	0	1	1	0	62	2	2	1	0	9	0	0	0	365	0	0
104	66	0	70	163	26.3465	0	0	0	1	2	0	0.9	1	0.1	1	0	0	0	0	0	3	2	11.7	1	1	2	1	1	1	1	0	70	2	2	1	0	6	0	0	0	365	0	0
105	64	1	74	171	25.3069	0	2	0	0	0	0	0.9	1	0.1	0	0	0	0	0	0	1	1	14	1	0	1	2	0	1	1	0	0	2	2	1	0	8	0	0	0	365	0	0
106	71	0	77	146	36.1231	1	0	0	1	2	0	0.56	0.7	0.14	1	0	0	0	0	0	1	1	10.8	1	1	1	2	0	1	1	0	65	2	2	1	0	3	0	0	0	365	0	0
107	49	1	70	168	24.8016	0	2	0	0	2	0	0.6	1.1	0.5	0	0	1	0	0	0	1	1	12.9	1	1	2	1	1	1	2	1	35	2	2	1	0	7	0	0	0	365	1	0
108	55	0	80	165	29.3848	0	2	0	1	2	0	0.7	0.9	0.2	0	0	0	0	0	0	1	1	13.8	1	1	2	1	1	1	1	0	60	2	2	1	0	8	0	0	0	365	0	0
109	80	1	76	173	25.3934	0	1	0	1	2	1	0.9	1.1	0.2	0	0	0	0	0	0	2	2	14.3	1	1	2	2	0	1	1	0	0	0	0	0	0	8	0	18	1	18	0	0
110	48	0	90	159	35.5999	1	2	0	1	0	0	0.7	0.9	0.2	0	0	0	0	0	0	1	1	13.7	1	1	2	1	1	1	1	0	55	2	2	2	0	16	0	0	0	365	0	0
111	68	0	61	152	26.4024	0	2	0	1	0	0	0.6	0.7	0.1	0	0	0	0	0	0	1	1	14	0	0	2	3	0	1	1	0	65	2	1	1	0	4	0	0	0	365	0	0
112	72	1	105	174	34.6809	1	1	0	1	0	0	0.9	1.2	0.3	0	0	0	1	0	0	1	1	15	1	1	2	1	1	2	1	0	50	2	2	1	0	17	0	0	0	365	2	0
113	60	0	58	165	21.3039	0	2	0	1	2	1	1.4	1.49	0.09	1	0	0	0	0	0	1	1	10.9	1	1	2	1	1	1	1	0	60	2	2	1	0	12	0	0	0	365	0	0
114	53	1	75	168	26.5731	0	2	0	1	2	0	0.8	1	0.2	0	0	0	0	0	1	4	2	15.4	1	0	2	2	0	1	1	0	65	2	2	1	0	7	0	356	1	356	0	0
115	55	0	73	161	28.1625	0	2	0	1	0	0	0.7	1	0.3	1	0	1	0	1	0	1	1	10.4	1	1	2	1	1	1	1	0	40	2	2	1	0	9	0	0	0	365	1	0
116	68	1	62	168	21.9671	0	1	0	0	0	0	0.87	1.2	0.33	0	0	1	0	0	0	1	1	15	0	1	2	3	0	1	1	0	65	2	1	1	0	4	0	0	0	365	1	0
117	63	0	75	155	31.2175	1	0	0	1	0	0	0.7	1	0.3	1	0	1	0	0	0	1	1	11.9	1	1	2	1	1	1	1	0	45	2	1	1	0	9	0	0	0	365	1	0
118	50	1	68	177	21.7051	0	1	0	0	2	0	0.8	1	0.2	0	1	0	0	0	0	1	1	14.8	1	0	2	2	0	1	1	0	65	2	1	2	0	19	0	160	1	160	0	0
119	77	1					0	0	1	0	0	0.7	0.8	0.1	0	0	0	0	0	0	1	1	0	0	0	2	3	0	1	1	0	60	1	0	2	0	4	0	0	0	365	0	0
120	63	1	67	164	24.9108	0	1	0	1	0	0	1.1	1.5	0.4	0	0	1	0	0	0	2	2	14	1	1	2	1	1	1	1	0	60	2	1	1	0	9	0	0	0	365	1	0
121	70	1					2	0	0	2	1	1.5	2.7	1.2	1	1	1	0	1	0	3	1	6.6	1	0	1	2	0	1	2	1	35	1	0	0	0	23	1	0	0	365	1	0
122	68	0	54	160	21.0937	0	0	0	1	2	1	1.8	5.2	3.4	1	0	1	0	0	0	4	3	10.7	1	1	2	2	0	1	1	0	60	1	0	0	0	18	0	0	0	365	1	0
123	89	0	52	146	24.3948	0	0	0	1	0	0	1.04	1.8	0.76	0	0	1	1	0	0	1	1	13	1	1	1	2	0	3	2	1	35	2	1	2	0	7	0	0	0	365	3	4
124	78	1	78	174	25.763	0	1	2	1	0	0	0.9	1.1	0.2	0	0	0	0	0	0	1	1	16.7	0	0	2	3	0	1	1	0	0	3	0	0	0	11	0	0	0	365	0	0
125	34	0	60	163	22.5827	0	2	0	1	0	0	0.6	0.72	0.12	0	0	0	0	0	0	3	5	15.5	1	0	2	1	1	1	2	1	35	2	2	1	0	11	0	0	0	365	0	0
126	55	1	80	170	27.6817	0	0	2	1	0	0	0.8	1	0.2	0	0	0	0	0	0	1	1	15.8	1	1	2	2	0	1	1	0	70	1	0	0	0	12	0	0	0	365	0	0
127	46	0	83	162	31.6263	1	2	0	1	0	0	0.4	0.8	0.4	0	0	1	0	0	0	1	1	12.5	1	0	2	1	1	1	1	0	58	2	2	1	0	9	0	0	0	365	1	0
128	58	1	84	163	31.6158	1	1	0	0	0	0	1	1.1	0.1	0	0	0	0	0	0	1	1	15.7	1	1	2	1	1	1	1	0	45	2	1	1	0	6	0	0	0	365	0	0
129	33	1	75	180	23.1481	0	2	0	0	0	0	0.98	1.2	0.22	0	0	0	0	0	0	1	1	16	1	0	2	2	0	1	1	0	65	1	0	1	0	11	0	0	0	365	0	0
130	73	0	45	165	16.5289	0	2	0	1	2	1	2.5	3.5	1	1	1	1	1	0	1	1	1	11.4	1	1	2	2	0	1	1	0	65	2	1	2	0	14	0	0	0	365	3	2
131	54	0	79	150	35.1111	1	2	0	0	0	1	0.6	7.1	6.5	1	0	1	1	0	0	1	1	9.5	1	1	2	1	1	4	1	0	60	1	0	2	0	23	0	0	0	365	3	4
132	65	0	83	170	28.7197	0	0	0	1	2	1	0.8	3.1	2.3	1	1	1	0	0	0	1	1	9	1	1	2	2	0	1	1	0	55	2	2	2	0	12	0	0	0	365	1	0
133	61	0	70	159	27.6888	0	0	0	0	0	0	0.7	0.8	0.1	1	0	0	0	0	0	1	1	9.9	1	1	2	2	0	1	1	0	60	2	1	1	0	7	0	0	0	365	0	0
134	74	1					1	0	1	2	0	0.98	1	0.02	0	0	0	0	0	0	3	3	15.7	0	0	2	3	0	1	1	0	55	0	0	0	0	24	0	0	0	365	0	0
135	82	1	74	165	27.1809	0	0	0	1	0	0	1.27	1.4	0.13	0	0	0	0	0	0	1	1	15.6	1	1	2	2	0	1	1	0	60	1	0	0	0	2	0	0	0	365	0	0
136	59	1	86	171	29.4108	0	0	0	0	2	0	0.6	0.8	0.2	0	0	0	0	0	0	1	1	14.9	0	0	2	3	0	1	1	0	66	2	2	2	0	6	0	0	0	365	0	0
137	85	0	80	165	29.3848	0	0	0	1	0	0	0.7	1	0.3	1	0	1	1	0	0	1	1	11.3	1	1	2	2	0	3	1	0	45	1	0	0	0	27	1	0	1	132	3	3
138	71	1	75	178	23.6713	0	1	0	1	0	0	0.86	1	0.14	0	1	0	0	0	0	3	1	13.4	0	1	2	3	0	1	1	0	59	3	0	1	0	26	0	0	0	365	0	0
139	61	0	57	159	22.5466	0	2	0	0	0	0	0.6	0.9	0.3	0	0	1	0	0	0	1	1	14.6	1	0	2	1	1	1	1	0	65	2	1	1	0	11	0	0	0	365	1	0
140	81	1	80	170	27.6817	0	1	0	1	2	0	1.1	1.6	0.5	1	0	1	0	0	0	1	1	11	1	1	2	1	1	1	2	1	40	2	1	1	0	4	0	130	1	130	1	0
141	44	1	80	178	25.2493	0	2	2	0	0	0	0.6	1	0.4	0	0	1	0	0	0	1	1	16	1	0	2	2	0	1	1	0	40	2	2	1	0	11	0	0	0	365	1	0
142	57	1	87	168	30.8248	1	2	0	0	0	0	0.5	0.7	0.2	0	0	0	0	0	0	1	1	15	0	0	2	3	0	1	1	0	0	1	0	0	0	7	0	0	0	365	0	0
143	86	1					0	0	1	0	0	1	1.14	0.14	0	0	0	0	0	0	1	1	15.7	0	1	2	3	0	1	0		0	1	0	0	0	10	0	0	0	365	0	0
144	55	0	62	158	24.8358	0	0	0	1	0	0	0.57	0.63	0.06	0	0	0	0	0	0	1	1	14.5	0	1	2	3	0	1	1	0	60	1	0	0	0	7	0	0	0	365	0	0
145	79	0	56	145	26.635	0	2	0	1	0	0	0.98	2.2	1.22	0	0	1	0	0	0	1	1	12.7	1	1	2	2	0	1	1	0	72	2	1	1	0	9	0	0	0	365	1	0
146	68	0	80	157	32.4557	1	0	0	1	2	0	0.5	0.7	0.2	1	0	0	0	0	0	1	1	12.9	1	1	2	2	0	1	1	0	60	3	0	2	0	7	0	0	0	365	0	0
147	36	1	82	177	26.1738	0	2	0	0	0	0	0.7	1	0.3	0	0	1	0	0	0	1	1	15	1	0	2	2	0	1	1	0	50	1	0	1	0	5	0	0	0	365	1	0
148	50	1	82	165	30.1194	1	0	0	1	0	0	1.1	1.2	0.1	0	0	0	0	0	0	2	2	15	0	0	2	3	0	1	1	0	0	1	0	0	0	5	0	0	0	365	0	0
149	48	1					2	2	1	0	0	0.7	1.3	0.6	0	0	1	0	0	0	2	2	14.6	1	1	2	1	1	1	2	1	35	2	2	2	0	8	0	35	1	35	1	0
150	77	1	101	178	31.8773	1	0	0	1	2	1	0.9	1.4	0.5	0	0	1	1	0	0	1	1	13.3	1	1	2	1	1	2	1	0	45	2	1	2	0	9	0	9	1	9	3	4
151	94	0					0	0	0	0	0	0.8	1	0.2	1	0	0	0	0	0	1	1	11.8	1	1	2	2	0	1	1	0	70	0	0	0	0	6	0	0	0	365	0	0
152	71	0	78	150	34.6667	1	0	0	1	0	0	0.7	0.9	0.2	0	0	0	0	0	0	1	1	13.4	0	1	2	3	0	1	1	0	65	2	1	1	0	5	1	0	0	365	0	0
153	66	1					2	0	1	0	0	1.08	1.2	0.12	0	0	0	0	0	1	1	1	14.2	1	1	2	2	0	1	1	0	60	1	0	0	0	6	0	0	0	365	0	0
154	52	1	114	174	37.6536	1	0	0	1	0	0	0.75	1	0.25	1	0	0	0	0	0	1	1	12	0	0	2	3	0	1	1	0	0	1	0	1	0	13	0	0	0	365	0	0
155	64	1	72	172	24.3375	0	1	0	0	2	0	0.7	1.5	0.8	0	0	1	0	0	0	1	1	16	1	0	2	1	1	1	1	0	50	2	1	1	0	14	0	0	0	33	1	0
156	69	1	98	175	32	1	0	2	1	2	1	1.2	1.7	0.5	1	0	1	0	0	0	1	1	11.7	1	0	2	2	0	1	1	0	65	2	2	1	0	25	0	209	1	209	1	0
157	57	1	108	175	35.2653	1	2	0	1	2	0	0.6	1	0.4	0	0	1	0	0	0	1	1	13.9	1	1	2	1	1	1	1	0	60	1	0	1	0	7	0	0	0	365	1	0
158	72	1	94	169	32.912	1	0	0	1	0	0	0.8	1.1	0.3	0	0	1	0	0	0	1	1	13.2	1	0	2	1	1	1	0		0	2	2	1	0	17	0	0	0	365	1	0
159	83	0					0	0	0	0	1	0.7	1.3	0.6	0	0	1	0	0	0	1	1	12.8	1	0	2	2	0	1	1	0	60	1	0	0	0	7	1	0	0	365	1	0
160	67	1	88	165	32.3232	1	0	0	1	2	0	0.7	1.1	0.4	0	0	1	0	0	0	4	1	13	0	1	2	3	0	1	1	0	65	3	0	0	0	20	0	0	0	365	1	0
161	71	1	78	177	24.8971	0	1	0	0	0	0	0.7	1.2	0.5	0	0	1	0	0	0	1	1	15	0	1	2	3	0	1	1	0	0	2	1	1	0	24	0	0	0	365	1	0
162	74	1	72	166	26.1286	0	0	0	1	2	0	1	2.7	1.7	0	0	1	1	0	0	5	2	16.9	1	1	2	1	1	3	2	1	35	2	0	2	0	20	0	15	1	15	3	4
163	76	1	65	156	26.7094	0	1	0	0	2	0	1	2.6	1.6	1	0	1	1	1	0	1	1	9.8	1	1	1	1	1	4	0		0	1	0	0	1	3	0	0	1	3	3	4
164	77	1	83	169	29.0606	0	1	0	1	2	0	0.88	1.2	0.32	0	0	1	0	0	0	3	2	14	1	0	2	3	0	1	1	0	65	2	2	2	0	14	0	0	0	365	1	0
165	75	0	80	152	34.626	1	0	0	1	2	0	0.8	1.2	0.4	1	1	1	1	0	1	1	1	11.2	1	1	2	1	1	4	1	0	50	2	2	2	1	3	0	0	1	3	3	3
166	85	0	95	162	36.1988	1	0	0	1	0	0	0.77	1	0.23	0	0	0	1	0	0	1	1	13	1	1	2	2	0	3	1	0	60	2	1	1	0	10	0	0	0	365	2	0
167	67	0	100	165	36.7309	1	2	0	1	2	1	2.5	3.56	1.06	1	0	1	0	1	0	1	1	10.4	1	0	2	1	1	1	1	0	55	2	2	2	0	12	0	0	0	365	1	0
168	78	1					0	0	1	0	0	1.2	1.3	0.1	1	0	0	0	0	0	1	1	11.6	1	1	2	1	1	1	1	0	60	2	1	1	0	9	0	0	0	365	0	0
169	76	1	90	173	30.0712	1	1	0	1	2	1	1.43	2	0.57	0	0	1	0	0	0	2	3	13	1	1	2	1	1	1	2	1	30	1	0	2	0	23	0	18	1	18	1	0
170	56	1	95	175	31.0204	1	2	0	0	2	0	0.8	0.9	0.1	0	0	0	0	0	0	1	1	15.8	1	1	2	2	0	1	1	0	60	2	0	2	0	5	0	0	0	365	0	0
171	44	0	63	163	23.7118	0	2	0	1	0	0	1.3	1.7	0.4	1	0	1	0	0	0	1	1	11.4	1	1	2	1	1	1	1	0	65	2	2	1	0	7	0	0	0	365	1	0
172	58	0	69	165	25.3444	0	0	0	0	0	0	0.7	0.9	0.2	0	0	0	0	0	0	1	1	13.4	1	1	2	1	1	1	1	0	60	2	1	1	0	7	0	0	0	365	0	0
173	67	1	80	168	28.3447	0	1	0	1	0	0	1	1.4	0.4	0	0	1	0	0	0	1	1	15.1	0	0	2	3	0	1	1	0	60	0	0	0	0	3	0	0	0	365	1	0
174	83	1					0	0	0	2	0	0.79	1	0.21	1	0	0	1	0	1	3	3	12.3	1	0	2	2	0	3	2	1	40	1	0	0	0	8	1	48	1	48	2	0
175	53	0					2	0	1	0	0	0.7	0.9	0.2	0	0	0	0	0	0	1	1	15.5	1	1	2	2	0	1	1	0	60	1	0	0	0	5	0	0	0	365	0	0
176	84	0					0	0	0	0	0	0.92	1.2	0.28	0	0	0	1	0	0	1	1	15	1	0	2	1	1	3	3	1	30	1	0	2	0	8	0	0	0	365	2	0
177	46	0	76	160	29.6875	0	0	0	1	0	0	0.8	1.1	0.3	1	0	1	1	0	0	1	1	11.6	1	0	2	1	1	2	2	1	30	2	2	1	0	15	0	0	0	365	3	3
178	62	1	83	174	27.4145	0	2	0	1	2	0	0.8	1	0.2	0	0	0	0	0	0	1	1	15	1	0	2	1	1	1	1	0	69	1	0	2	0	6	1	0	0	365	0	0
179	55	1	75	170	25.9516	0	2	0	0	0	0	0.8	0.9	0.1	0	0	0	0	0	0	1	1	15.9	0	1	2	3	0	1	1	0	0	3	0	0	0	6	0	0	0	365	0	0
180	56	1	73	172	24.6755	0	1	0	0	0	0	0.8	1.2	0.4	0	0	1	0	0	0	1	1	14	0	0	2	3	0	1	1	0	55	2	2	1	0	9	0	0	0	365	1	0
181	66	0					2	0	0	2	0	0.7	1.2	0.5	1	0	1	0	0	0	1	1	12.8	1	1	2	2	0	1	1	0	60	1	0	0	0	16	0	0	0	365	1	0
182	48	0	44	155	18.3143	0	2	0	1	0	0	0.56	0.8	0.24	0	0	0	0	0	0	1	1	14	0	0	2	3	0	1	1	0	64	1	0	1	0	7	0	0	0	365	0	0
183	75	0	65	157	26.3702	0	2	0	0	2	0	0.5	0.8	0.3	0	0	1	0	0	0	4	3	13.4	0	1	2	3	0	1	1	0	67	2	2	2	0	10	0	0	0	365	1	0
184	79	0	94	157	38.1354	1	0	0	1	2	0	0.75	0.9	0.15	0	0	0	0	0	0	1	1	13	0	0	2	3	0	1	1	0	55	3	0	1	0	28	0	0	0	365	0	0
185	76	1	100	176	32.2831	1	1	0	1	2	0	0.94	1.4	0.46	1	0	1	0	0	1	3	1	9.9	1	1	2	2	0	1	1	0	65	3	0	1	0	11	0	0	0	365	1	0
186	49	0	93	171	31.8047	1	1	0	1	0	0	0.8	0.9	0.1	0	0	0	0	0	0	1	1	12.7	1	1	2	2	0	1	1	0	65	1	0	2	0	10	0	60	1	60	0	0
187	86	0					0	0	0	2	0	0.71	1	0.29	1	0	0	0	0	0	5	1	11.7	1	0	2	2	0	1	1	0	60	0	0	0	0	7	0	138	1	138	0	0
188	79	1	75	175	24.4898	0	0	0	1	0	0	0.7	1	0.3	0	0	1	0	0	0	1	1	14.6	1	0	2	2	0	1	1	0	60	1	0	2	0	8	0	0	0	365	1	0
189	63	0					0	0	1	2	0	0.4	0.6	0.2	0	0	0	0	0	0	5	1	13.4	0	0	2	3	0	1	1	0	0	1	0	0	0	11	0	0	0	365	0	0
190	41	0	68	165	24.977	0	2	0	0	0	0	0.9	3	2.1	1	0	1	1	0	0	1	1	12	1	0	2	1	1	4	2	1	35	2	2	1	1	1	0	0	1	1	3	4
191	76	1	77	176	24.858	0	2	0	0	0	0	0.8	1.4	0.6	0	0	1	0	0	0	1	1	13.8	1	0	2	2	0	1	1	0	60	2	2	1	0	5	0	0	0	365	1	0
192	60	0	85	162	32.3884	1	0	0	1	2	1	1.3	1.8	0.5	1	0	1	0	0	0	1	1	11.3	1	1	2	2	0	1	1	0	65	2	2	1	0	12	1	0	0	365	1	0
193	61	1	78	180	24.0741	0	2	0	1	2	1	0.63	1	0.37	0	0	1	1	0	0	5	1	16.5	1	0	2	2	0	3	3	1	25	3	0	1	0	8	1	47	1	47	3	3
194	75	0	80	163	30.1103	1	0	0	0	2	0	0.6	0.9	0.3	0	0	1	0	0	0	4	2	13.9	1	1	2	2	0	1	1	0	55	2	1	2	0	7	1	0	0	365	1	0
195	45	1	92	182	27.7744	0	2	0	1	0	0	0.78	1	0.22	0	0	0	0	0	0	1	1	15	1	1	2	1	1	1	1	0	60	2	2	1	0	8	0	0	0	365	0	0
196	76	0	75	160	29.2969	0	0	0	1	2	0	0.5	0.7	0.2	0	0	0	1	0	0	1	1	13.2	1	1	2	2	0	2	1	0	45	3	0	0	0	31	1	213	1	213	2	0
197	69	1	60	167	21.5139	0	2	0	1	2	1	1.5	3.7	2.2	1	1	1	1	0	0	1	1	12	1	1	2	2	0	3	2	1	35	2	2	2	1	60	0	0	1	60	3	4
198	51	1	84	168	29.7619	0	2	0	1	0	1	2.45	3.1	0.65	1	0	1	0	0	0	2	2	12.8	1	1	2	1	1	1	1	0	50	2	2	1	0	3	0	0	0	365	1	0
199	60	1	80	170	27.6817	0	2	0	0	2	0	0.7	0.9	0.2	0	0	0	0	0	0	2	1	16.1	1	1	1	2	0	1	1	0	0	1	0	0	0	16	0	30	1	30	0	0
200	49	0	71	158	28.441	0	2	0	0	0	0	0.7	0.9	0.2	1	0	0	0	0	0	1	1	11	1	1	2	1	1	1	1	0	60	2	1	1	0	7	0	0	0	365	0	0
201	59	0	56	160	21.875	0	2	0	1	0	0	0.75	1	0.25	0	0	0	0	0	0	1	1	14	0	0	2	3	0	1	1	0	60	3	0	1	0	5	0	0	0	365	0	0
202	73	0	85	161	32.7919	1	0	0	1	2	0	0.8	1.1	0.3	0	0	1	0	0	0	2	3	12.6	0	0	2	3	0	1	1	0	60	1	0	2	0	2	0	244	1	244	1	0
203	28	0	57	144	27.4884	0	2	0	0	1	0	1.05	1.33	0.28	1	0	0	0	0	0	1	1	11.1	0	0	2	3	0	1	1	0	57	2	2	1	0	7	0	0	0	365	0	0
204	75	0	43	163	16.1843	0	1	0	0	0	0	0.99	1.1	0.11	0	0	0	0	0	0	4	3	12.7	0	1	2	3	0	1	1	0	65	1	0	0	0	10	1	0	0	365	0	0
205	48	0	71	150	31.5556	1	2	0	1	0	0	0.6	0.7	0.1	0	0	0	0	0	0	2	2	13	0	1	2	3	0	1	2	1	37	2	2	1	0	7	0	0	0	365	0	0
206	25	1	86	190	23.8227	0	2	0	0	0	0	0.8	1.1	0.3	0	0	1	0	0	0	1	1	15.6	1	0	2	2	0	1	1	0	0	1	0	1	0	7	0	0	0	365	1	0
207	55	0	90	161	34.7209	1	0	0	1	0	0	0.6	0.8	0.2	0	0	0	0	0	0	1	1	13.1	0	1	2	3	0	1	1	0	65	2	1	1	0	12	0	50	1	50	0	0
208	81	1	83	169	29.0606	0	0	0	1	2	1	1.8	2.1	0.3	1	0	1	0	0	0	3	4	11.5	1	0	2	2	0	1	1	0	45	1	0	0	0	6	1	106	1	106	1	0
209	68	0	80	158	32.0461	1	0	0	1	0	0	0.6	1	0.4	1	0	1	0	0	0	1	1	11.8	1	1	1	1	1	1	1	0	60	2	1	1	0	8	0	0	0	365	1	0
210	88	0					0	0	1	0	1	0.5	1.2	0.7	1	0	1	1	0	0	1	1	11.8	1	0	2	2	0	2	1	0	80	1	0	0	0	30	1	0	1	86	3	4
211	76	1	64	160	25	0	1	0	1	2	0	0.97	1.3	0.33	0	0	1	0	0	0	5	2	15.5	1	1	2	2	0	1	1	0	60	1	0	1	0	11	0	0	0	365	1	0
212	82	0	85	175	27.7551	0	0	0	1	0	0	1	1.2	0.2	1	0	0	1	0	0	1	1	11.8	1	1	2	1	1	3	2	1	30	2	1	2	0	16	0	0	0	365	2	0
213	58	0	116	147	53.6813	1	2	2	1	0	0	0.7	0.9	0.2	1	0	0	0	0	0	1	1	10.9	1	1	2	2	0	1	1	0	65	2	2	1	0	7	0	0	0	365	0	0
214	66	0	106	165	38.9348	1	0	0	1	0	0	0.7	0.8	0.1	1	0	0	0	0	0	1	1	8.3	1	1	2	2	0	1	1	0	67	2	2	1	0	20	0	0	0	365	0	0
215	50	1	76	177	24.2587	0	2	0	0	2	0	0.89	1	0.11	0	1	0	0	0	0	2	2	15.7	1	0	2	1	1	1	3	1	25	2	2	2	0	7	1	0	0	365	0	0
216	74	0	70	145	33.2937	1	0	0	1	2	1	1.6	3	1.4	1	1	1	1	0	1	1	1	11.3	1	1	2	2	0	3	1	0	45	3	0	0	0	4	1	0	1	61	3	4
217	66	1	88	176	28.4091	0	0	2	1	2	1	1.3	1.8	0.5	0	0	1	0	0	0	5	2	14.6	1	1	1	2	0	1	1	0	45	2	2	1	0	6	0	0	0	365	1	0
218	56	1	85	183	25.3815	0	2	0	0	0	0	0.9	1.1	0.2	1	1	0	0	0	1	1	1	12.8	1	0	2	2	0	1	1	0	0	2	2	1	0	3	0	0	0	365	0	0
219	69	0	80	156	32.8731	1	2	0	1	2	0	0.9	1.6	0.7	1	0	1	1	0	0	2	1	9.7	1	0	2	1	1	3	2	1	30	3	0	1	0	28	0	0	0	365	3	4
220	75	1	96	173	32.0759	1	0	0	1	0	0	0.6	0.8	0.2	0	0	0	0	0	0	4	2	15	0	1	1	3	0	1	1	0	55	3	0	1	0	31	0	0	0	365	0	0
221	48	1	70	170	24.2215	0	2	2	0	0	0	0.6	1.6	1	0	0	1	0	0	0	1	1	13.2	1	0	2	1	1	1	1	0	65	2	1	1	0	12	0	0	0	365	1	0
222	74	0	82	156	33.6949	1	1	0	1	0	0	0.8	1.1	0.3	0	0	1	0	0	0	1	1	12.6	1	1	2	1	1	1	1	0	55	2	2	1	0	14	0	0	0	365	1	0
223	96	0					0	0	1	0	1	1.5	3.7	2.2	1	0	1	1	0	0	5	1	11	1	0	2	2	0	3	0		0	1	0	0	1	2	0	0	1	2	3	4
224	65	0	60	153	25.6312	0	0	0	1	0	0	0.9	1	0.1	0	0	0	0	0	0	1	1	15	0	0	2	3	0	1	1	0	47	2	2	1	0	6	0	0	0	365	0	0
225	55	0	74	170	25.6055	0	2	0	0	0	0	0.66	0.8	0.14	0	0	0	0	0	0	1	1	14.5	1	1	2	1	1	1	1	0	50	2	2	1	0	9	0	0	0	365	0	0
226	82	0	70	165	25.7117	0	0	0	0	0	0	1	1	0	0	0	0	0	0	0	1	1	12.8	1	0	2	2	0	1	1	0	50	2	2	1	0	6	0	0	0	365	0	0
227	74	1	88	170	30.4498	1	0	0	1	2	1	1.56	2.15	0.59	1	0	1	0	1	0	1	1	12	1	1	1	2	0	1	1	0	58	1	0	0	0	15	1	0	0	365	1	0
228	71	1	90	163	33.8741	1	0	2	1	2	0	1.03	2	0.97	0	0	1	0	0	0	2	2	13.3	0	1	2	3	0	1	1	0	62	1	0	2	0	35	0	0	0	365	1	0
229	53	0	95	164	35.3212	1	2	0	1	2	0	0.6	0.9	0.3	1	0	1	0	0	0	1	1	10.2	1	1	1	1	1	1	1	0	65	2	1	1	0	17	0	282	1	282	1	0
230	51	0	56	148	25.5661	0	2	0	1	0	0	0.6	0.7	0.1	1	0	0	0	0	0	1	1	10	1	1	2	1	1	1	1	0	65	2	0	1	0	7	0	0	0	365	0	0
231	67	1	108	180	33.3333	1	0	0	1	2	1	0.9	1.5	0.6	1	0	1	0	0	0	1	1	10.1	0	0	2	3	0	1	1	0	65	3	0	1	0	11	0	0	0	365	1	0
232	78	1	78	172	26.3656	0	0	0	1	2	0	1.66	2.5	0.84	0	0	1	0	0	0	1	1	12.2	1	0	2	2	0	1	0		0	1	0	2	0	13	0	0	0	365	1	0
233	47	1	83	175	27.102	0	0	0	1	0	0	0.9	1	0.1	0	0	0	0	0	0	1	1	16	1	0	2	2	0	1	1	0	50	2	2	1	0	5	0	0	0	365	0	0
234	51	0					2	0	0	0	0	0.8	0.9	0.1	0	0	0	0	0	0	1	1	13	1	1	2	2	0	1	1	0	68	1	0	2	0	7	0	0	0	365	0	0
235	45	0					2	0	0	0	0	0.7	1	0.3	0	0	1	0	0	0	1	1	13.6	1	0	2	1	1	1	0		0	2	2	1	0	9	0	0	0	365	1	0
236	71	1	113	189	31.6341	1	1	2	1	0	0	0.9	1.2	0.3	0	0	0	0	0	0	2	1	15	0	1	2	3	0	1	2	1	40	1	0	2	0	19	0	0	0	365	0	0
237	59	0	70	160	27.3437	0	2	0	1	0	0	0.5	1	0.5	0	0	1	0	0	0	1	1	14.8	1	1	2	1	1	1	1	0	60	2	1	1	0	6	0	0	0	365	1	0
238	65	1	100	178	31.5617	1	0	0	1	0	0	0.87	1	0.13	0	0	0	0	0	0	1	1	14.5	0	1	2	3	0	1	1	0	60	3	0	1	0	10	0	0	0	365	0	0
239	75	1	75	165	27.5482	0	1	0	0	0	0	0.69	0.8	0.11	0	0	0	0	0	0	1	1	15	1	1	2	1	1	1	1	0	60	2	2	1	0	9	0	0	0	365	0	0
240	68	1	88	164	32.7186	1	0	0	1	2	1	1	2.3	1.3	1	0	1	0	0	0	2	3	12.9	1	0	2	2	0	1	1	0	65	2	0	2	0	11	0	0	0	365	1	0
241	63	1	80	156	32.8731	1	2	0	1	0	0	0.9	1.1	0.2	0	0	0	0	0	0	1	1	16	0	1	2	3	0	1	1	0	0	2	1	1	0	36	0	0	0	365	0	0
242	56	1					0	0	1	2	0	0.8	1	0.2	0	0	0	0	0	0	4	2	14.4	0	1	2	3	0	1	0		0	0	0	0	0	4	0	0	0	365	0	0
243	56	0	60	154	25.2994	0	2	0	1	0	0	0.2	0.8	0.6	1	0	1	0	0	0	1	1	11.2	1	1	2	1	1	1	1	0	60	2	1	1	0	7	0	0	0	365	1	0
244	63	0	74	160	28.9062	0	2	0	0	0	0	0.54	0.8	0.26	0	0	0	0	0	0	1	1	13.9	1	1	2	2	0	1	1	0	60	2	1	1	0	9	0	105	1	105	0	0
245	63	1	80	160	31.25	1	2	0	1	2	0	0.9	1.2	0.3	0	0	0	0	0	0	1	1	15.7	1	0	2	2	0	1	1	0	57	1	0	2	0	6	0	349	1	349	0	0
246	70	1	80	164	29.7442	0	0	2	1	2	0	0.9	1.1	0.2	1	0	0	0	0	0	1	1	11.9	1	1	2	2	0	1	1	0	65	2	2	1	0	9	0	0	0	365	0	0
247	63	1	66	179	20.5986	0	2	0	0	0	0	0.9	1.1	0.2	0	0	0	0	0	0	1	1	16.6	1	0	2	1	1	1	1	0	0	2	2	1	0	10	0	0	0	365	0	0
248	74	1	85	175	27.7551	0	1	0	0	0	0	0.85	1.1	0.25	0	0	0	0	0	0	2	2	15	0	1	2	3	0	1	1	0	45	3	0	0	0	11	0	0	0	365	0	0
249	84	1	72	170	24.9135	0	1	0	1	0	0	0.88	1.1	0.22	0	0	0	1	1	0	3	1	13	0	0	2	3	0	2	1	0	65	1	0	0	0	13	1	0	1	347	2	0
250	82	1					2	0	1	2	1	2	2.6	0.6	1	0	1	0	0	0	1	1	9.3	1	1	2	1	1	1	1	0	50	1	0	2	0	29	0	0	0	365	1	0
251	61	1	88	167	31.5537	1	1	2	1	2	0	0.7	0.8	0.1	0	0	0	0	0	0	4	1	13.6	1	1	2	2	0	1	1	0	60	2	2	2	0	5	0	0	0	365	0	0
252	46	1	92	181	28.0822	0	2	2	0	0	0	0.52	0.7	0.18	0	0	0	0	0	0	1	1	14	1	0	2	1	1	1	2	1	35	2	2	1	0	7	0	0	0	0	0	0
253	57	1	84	170	29.0657	0	0	0	1	0	0	0.7	0.8	0.1	0	0	0	0	0	0	1	1	15	1	0	2	2	0	1	1	0	65	2	0	2	0	7	0	0	0	365	0	0
254	72	1	90	170	31.1419	1	1	0	1	0	0	0.8	1.1	0.3	0	0	1	0	0	0	1	1	14.3	0	0	2	3	0	1	0		0	0	0	0	0	13	0	0	0	365	1	0
255	79	1					1	0	1	2	0	1.4	1.9	0.5	0	0	1	0	0	0	1	1	13.2	1	1	2	1	1	1	1	0	55	0	0	0	0	9	0	0	0	365	1	0
256	78	1	46	156	18.902	0	0	0	1	0	1	1.5	2.1	0.6	1	1	1	0	0	1	5	1	10.9	0	1	2	3	0	1	1	0	0	3	0	1	0	46	0	0	0	365	1	0
257	73	1	84	166	30.4834	1	1	2	1	0	0	1.08	1.3	0.22	1	1	0	0	0	0	2	0	12.9	1	1	2	2	0	1	2	1	40	2	0	1	0	5	0	0	0	365	0	0
258	71	1					2	2	1	2	0	1.3	4.1	2.8	0	0	1	1	0	0	1	1	13	1	1	1	1	1	4	0		0	1	0	0	1	3	0	0	1	3	3	4
259	60	1	120	164	44.6163	1	1	2	1	2	0	1	1.3	0.3	0	0	1	0	0	0	1	1	14	0	1	2	3	0	1	1	0	67	1	0	1	0	14	0	0	0	365	1	0
260	38	1					2	0	1	0	0	0.6	1	0.4	0	0	1	0	0	0	2	1	16	1	0	2	1	1	1	1	0	65	0	0	0	0	5	0	0	0	365	1	0
261	78	0	65	140	33.1633	1	0	0	1	2	0	0.8	2.1	1.3	1	0	1	1	0	0	1	1	10.8	1	1	2	2	0	3	1	0	65	1	0	1	0	12	0	0	0	365	3	4
262	43	0	55	160	21.4844	0	2	0	0	0	0	0.7	0.9	0.2	0	0	0	0	0	0	1	1	15.5	1	1	2	1	1	1	1	0	45	2	1	1	0	4	0	0	0	365	0	0
263	66	1	102	170	35.2941	1	0	0	1	2	0	0.9	1.1	0.2	0	0	0	0	0	0	2	0	16	1	1	2	2	0	1	1	0	60	1	0	0	0	8	0	0	0	365	0	0
264	54	1	79	169	27.6601	0	0	0	1	2	0	0.7	1.1	0.4	0	0	1	0	0	0	1	1	13.1	1	0	2	1	1	1	2	1	31	3	0	1	0	52	0	0	0	365	1	0
265	44	1	100	178	31.5617	1	0	0	1	2	1	1.37	1.6	0.23	1	0	0	0	0	0	1	1	12.8	1	1	1	1	1	1	1	0	59	2	2	1	0	13	0	0	0	365	0	0
266	82	1	68	159	26.8977	0	1	0	1	2	0	1.4	1.9	0.5	0	0	1	0	0	0	1	1	13	1	1	2	2	0	1	1	0	56	2	1	1	0	8	0	0	0	365	1	0
267	75	1	80	175	26.1224	0	1	0	1	2	1	2.5	5.2	2.7	1	0	1	0	0	0	1	1	11.7	1	1	2	1	1	1	1	0	45	2	1	1	1	3	0	0	1	3	1	0
268	44	0	60	156	24.6548	0	2	0	0	0	0	0.6	0.8	0.2	0	0	0	0		0	1	1	13.8	0	0	2	3	0	1	1	0	65	2	2	1	0	7	0	0	0	365	0	0
269	78	0	80	165	29.3848	0	2	0	1	0	0	0.6	1.2	0.6	0	0	1	1	0	0	1	1	14	1	1	2	2	0	3	1	0	60	2	2	2	0	18	1	116	1	116	3	4
270	21	1	89	168	31.5334	1	2	2	0	0	0	0.8	1.1	0.3	0	0	1	0	0	0	1	1	14.8	1	1	2	2	0	1	1	0	65	0	0	0	0	9	0	0	0	365	1	0
271	67	1	72	172	24.3375	0	0	0	1	2	0	0.58	1	0.42	0	0	1	1	0	0	2	2	12	1	1	1	1	1	3	2	1	30	1	0	2	0	22	0	141	1	141	3	4
272	61	0					2	0	0	0	0	0.4	0.6	0.2	0	0	0	0	0	0	1	1	15	1	0	1	2	0	1	1	0	55	2	2	2	0	6	0	0	0	365	0	0
273	55	1	58	167	20.7967	0	2	0	0	0	0	0.5	1	0.5	1	0	1	0	0	0	1	1	12.2	1	0	2	1	1	1	1	0	55	2	2	1	0	8	0	0	0	365	1	0
274	50	1	95	168	33.6593	1	0	0	1	0	0	0.8	0.9	0.1	0	0	0	0	0	0	1	1	13.3	1	0	2	2	0	1	1	0	65	2	2	1	0	8	0	0	0	365	0	0
275	73	1	78	172	26.3656	0	1	0	1	2	0	0.8	1	0.2	0	0	0	0	0	0	1	1	13	1	0	2	2	0	1	1	0	60	2	2	1	0	5	0	121	1	121	0	0
276	76	0					1	0	0	0	0	0.67	0.8	0.13	0	0	0	0	0	0	1	1	12.4	0	0	2	3	0	1	1	0	76	1	0	0	0	5	0	0	0	365	0	0
277	65	1	80	167	28.6851	0	0	0	1	2	0	0.84	1.3	0.46	0	0	1	0	0	0	1	1	13	0	1	2	3	0	1	1	0	0	3	0	1	0	28	0	0	0	365	1	0
278	51	1	79	172	26.7036	0	2	0	0	0	0	0.8	1.1	0.3	0	0	1	0	0	0	1	1	16	1	0	2	1	1	1	1	0	40	2	2	1	0	6	0	0	0	365	1	0
279	50	1	93	175	30.3673	1	2	0	1	2	0	0.9	1.3	0.4	0	0	1	0	0	0	1	1	13.4	1	1	2	1	1	1	1	0	60	2	2	1	0	11	0	0	0	365	1	0
280	47	1	70	170	24.2215	0	2	0	0	0	0	1.4	1.4	0	0	0	0	1	0	0	1	1	15	1	0	2	1	1	4	0		0	1	0	0	1	1	0	0	1	1	2	0
281	74	0	68	167	24.3824	0	0	0	1	2	1	1.4	3.4	2	0	0	1	1	0	0	4	3	12.5	1	1	1	3	0	4	3	1	20	2	2	2	0	42	1	68	1	68	3	4
282	72	0					0	0	1	0	0	0.7	1	0.3	1	0	1	0	0	0	1	1	11.8	0	1	2	3	0	1	1	0	0	1	0	0	0	4	0	54	1	54	1	0
283	84	0	52	150	23.1111	0	0	0	1	0	0	0.63	0.7	0.07	0	0	0	0	0	0	1	1	13.6	1	0	2	1	1	1	1	0	45	1	0	2	0	19	1	0	0	365	0	0
284	73	1	95	176	30.6689	1	0	0	1	2	0	0.8	0.93	0.13	0	0	0	0	0	0	1	1	15.7	0	1	1	3	0	1	1	0	60	3	0	1	0	7	0	0	0	365	0	0
285	56	1	84	175	27.4286	0	2	0	0	0	0	0.79	1.1	0.31	0	0	1	0	0	0	1	1	14.8	1	1	2	2	0	1	1	0	58	2	2	1	0	7	0	0	0	365	1	0
286	77	1	74	166	26.8544	0	0	0	1	2	0	0.8	1	0.2	0	0	0	0	0	0	3	1	14.5	1	1	2	2	0	1	1	0	58	3	0	1	0	21	0	0	0	365	0	0
287	54	1	91	167	32.6294	1	2	0	0	0	0	0.7	1	0.3	0	0	1	0	1	0	3	2	15.5	0	1	2	3	0	1	1	0	60	2	0	1	0	3	0	0	0	365	1	0
288	53	1	75	176	24.2123	0	2	0	0	0	0	0.9	1.3	0.4	0	0	1	0	0	1	1	1	13.2	1	1	2	1	1	1	1	0	50	2	1	1	0	10	0	2	1	2	1	0
289	59	0	80	162	30.4832	1	2	0	0	0	0	0.5	0.7	0.2	0	0	0	0	0	0	1	1	15.2	1	1	2	2	0	1	1	0	67	2	2	1	0	2	0	0	0	365	0	0
290	38	0	80	159	31.6443	1	2	2	0	0	0	0.4	0.69	0.29	0	0	0	0	0	0	3	2	12.6	1	1	2	1	1	1	2	1	35	2	2	1	0	5	0	0	0	365	0	0
291	67	1					2	1	1	0	0	1	1.2	0.2	0	0	0	0	0	0	1	1	12.4	1	0	2	2	0	1	1	0	60	1	0	0	0	9	0	0	0	365	0	0
292	78	1					2	0	0	0	0	0.92	1.1	0.18	0	0	0	0	0	0	1	1	15.2	0	1	2	3	0	1	1	0	60	1	0	2	0	4	0	0	0	365	0	0
293	61	1	84	170	29.0657	0	2	0	1	2	0	0.7	0.8	0.1	0	0	0	1	0	0	1	1	15.7	1	1	1	1	1	3	1	0	50	2	2	1	0	6	0	0	0	365	2	0
294	52	1	110	175	35.9184	1	2	0	0	0	0	0.7	1.4	0.7	0	0	1	0	0	0	1	1	18.4	1	0	1	1	1	1	1	0	60	2	2	1	0	7	0	0	0	365	1	0
295	51	1	105	180	32.4074	1	2	0	0	0	0	0.9	1.3	0.4	0	0	1	0	0	0	1	1	15.7	1	1	2	1	1	1	1	0	60	2	2	1	0	6	0	0	0	365	1	0
296	81	1	76	172	25.6896	0	1	0	0	2	0	1	1.3	0.3	0	1	1	0	0	0	1	1	15.7	1	0	2	1	1	1	1	0	60	3	0	0	0	43	0	0	0	365	1	0
297	61	1	90	172	30.4218	1	0	0	0	2	0	0.7	0.9	0.2	0	0	0	0	0	0	1	1	14.4	0	0	2	3	0	1	0		0	3	0	1	0	6	0	0	0	365	0	0
298	76	1					1	2	1	2	0	0.94	1	0.06	1	1	0	0	0	0	1	1	12.6	1	1	2	1	1	1	1	0	60	1	0	0	0	3	0	0	0	365	0	0
299	81	0	78	154	32.8892	1	0	0	0	2	1	2.1	2.8	0.7	0	0	1	1	0	0	1	1	12.5	1	0	1	1	1	4	1	0	45	2	0	0	1	3	0	0	1	3	3	4
300	65	1	72	168	25.5102	0	1	0	1	2	1	1.6	2.3	0.7	1	1	1	0	0	0	1	1	11	0	1	2	3	0	1	1	0	50	1	0	2	0	13	0	0	0	365	1	0
301	80	1	60	145	28.5375	0	1	0	0	0	0	0.7	0.85	0.15	0	0	0	0	0	0	3	2	13.7	0	0	2	3	0	1	0		0	3	0	1	0	7	1	0	0	365	0	0
302	59	0	66	155	27.4714	0	0	0	1	2	0	1	1.4	0.4	0	0	1	0	0	1	5	2	13	0	0	2	3	0	1	1	0	0	2	2	1	0	18	0	0	0	365	1	0
303	81	1					2	0	0	0	1	1.6	3.2	1.6	0	1	1	0	1	1	1	1	16.6	1	0	1	1	1	1	1	0	67	1	0	0	0	9	0	0	0	365	1	0
304	84	0	79	178	24.9337	0	0	0	1	0	0	0.6	0.7	0.1	1	0	0	0	0	0	1	1	11.9	0	1	2	3	0	1	1	0	60	1	0	2	0	9	0	0	0	365	0	0
305	76	0					0	0	1	0	0	0.83	1.1	0.27	1	0	0	1	0	1	1	1	12.1	1	1	2	1	1	2	1	0	60	1	0	2	0	7	0	0	0	365	2	0
306	68	1	90	181	27.4717	0	1	0	1	2	0	0.6	1	0.4	0	1	1	0	0	0	1	1	13.6	0	1	2	3	0	1	1	0	55	3	0	1	0	29	0	0	0	365	1	0
307	74	0	68	161	26.2336	0	0	0	0	2	0	0.67	0.9	0.23	0	0	0	0	0	0	2	2	15	1	1	2	2	0	1	1	0	74	1	0	0	0	8	0	0	0	365	0	0
308	61	1					2	0	0	0	0	0.7	1	0.3	0	0	1	0	0	0	1	1	14.9	1	1	2	1	1	1	1	0	65	1	0	2	0	12	0	0	0	365	1	0
309	70	1	75	175	24.4898	0	2	0	0	0	0	0.9	1.2	0.3	0	0	0	0	0	0	1	1	14.1	1	0	2	1	1	1	3	1	25	1	0	2	0	15	1	0	0	365	0	0
310	72	1	70	164	26.0262	0	0	0	1	2	0	0.5	0.8	0.3	0	0	1	0	0	0	1	1	15.4	1	1	1	1	1	1	1	0	80	2	1	1	0	6	0	0	0	365	1	0
311	74	1	80	175	26.1224	0	2	0	1	0	0	0.7	1.1	0.4	1	0	1	0	0	0	1	1	11.8	1	0	2	1	1	1	1	0	45	3	0	0	0	56	0	0	0	225	1	0
312	69	1	85	170	29.4118	0	0	0	1	0	0	0.83	1.1	0.27	0	0	0	0	0	0	1	1	15	1	0	2	2	0	1	1	0	56	2	2	1	0	8	0	16	1	16	0	0
313	54	0	64	154	26.986	0	2	0	0	0	0	0.4	0.8	0.4	1	0	1	0	0	0	1	1	11.1	1	0	2	2	0	1	1	0	60	2	1	1	0	13	0	284	1	284	1	0
314	74	0	100	170	34.6021	1	0	0	1	0	0	1	1.5	0.5	0	0	1	0	0	0	1	1	15.8	1	1	2	2	0	1	1	0	65	2	0	1	0	9	0	7	1	7	1	0
315	77	1	85	175	27.7551	0	2	0	0	0	0	0.8	1.1	0.3	1	0	1	0	0	1	3	2	11.4	1	0	2	2	0	1	2	1	35	1	0	2	0	37	0	0	0	365	1	0
316	65	1	85	174	28.075	0	1	0	1	2	0	0.9	1.1	0.2	0	0	0	0	0	0	1	1	15.4	0	0	2	3	0	1	1	0	60	3	0	1	0	23	0	0	0	365	0	0
317	65	1	85	172	28.7317	0	1	0	1	0	0	0.7	2.52	1.82	0	0	1	0	0	0	1	1	14	1	1	1	2	0	1	1	0	60	2	2	1	0	21	0	0	0	365	1	0
318	70	1	74	159	29.271	0	0	0	1	2	1	1	1.1	0.1	1	0	0	0	0	0	5	2	12.5	0	1	2	3	0	1	1	0	65	2	2	1	0	9	0	0	0	365	0	0
319	80	1	72	167	25.8166	0	1	1	0	0	1	1.2	2	0.8	1	0	1	0	0	0	1	1	7.9	1	0	2	2	0	1	1	0	0	0	0	0	0	14	1	0	0	365	1	0
320	81	1	59	167	21.1553	0	1	0	0	0	0	1.1	1.1	0	0	0	0	0	0	0	1	1	14.3	0	0	2	3	0	1	1	0	60	2	1	1	0	2	0	0	0	365	0	0
321	56	1	87	173	29.0688	0	0	0	1	2	0	0.9	1.2	0.3	0	0	0	0	0	0	1	1	14.8	1	1	2	2	0	1	1	0	65	2	1	1	0	6	0	250	1	250	0	0
322	68	0					0	0	1	0	0	1.2	1.2	0	0	0	0	1	0	0	1	1	13.4	1	0	2	1	1	4	0		0	1	0	0	1	0	0	0	1	1	2	0
323	45	1	65	170	22.4913	0	2	0	0	0	0	0.8	1.1	0.3	0	0	1	0	0	0	1	1	14.1	1	0	1	2	0	1	1	0	0	2	2	1	0	5	0	0	0	365	1	0
324	73	0	90	147	41.6493	1	1	0	0	2	0	1.2	1.2	0	0	0	0	0	0	0	1	1	13.3	0	0	2	3	0	1	1	0	65	2	2	1	0	5	0	19	1	19	0	0
325	42	0	78	167	27.968	0	2	0	1	0	0	0.5	0.8	0.3	0	0	1	0	0	0	1	1	14.6	1	0	2	1	1	1	2	1	35	2	2	1	0	8	0	0	0	365	1	0
326	42	1	58	158	23.2335	0	2	0	0	0	1	1.5	2.8	1.3	1	0	1	0	0	0	1	1	9.9	1	0	1	1	1	1	1	0	60	1	0	2	0	21	0	0	0	365	1	0
327	61	1					1	0	1	0	0	0.8	0.9	0.1	0	0	0	0	0	0	1	1	13.1	1	1	2	1	1	1	1	0	0	1	0	0	0	11	0	0	0	365	0	0
328	72	1	73	170	25.2595	0	1	2	1	0	0	0.8	0.9	0.1	0	1	0	0	0	1	1	1	15	0	1	2	3	0	1	1	0	65	3	0	1	0	19	0	0	0	365	0	0
329	81	1					2	2	0	0	1	2	3	1	1	0	1	0	1	0	1	1	11.9	1	0	2	2	0	1	1	0	0	1	0	0	0	6	0	0	0	365	1	0
330	79	1	111	173	37.0878	1	0	0	1	0	0	0.7	0.9	0.2	0	0	0	0	1	0	1	1	14.5	1	0	1	2	0	1	1	0	70	2	2	2	0	15	0	0	0	365	0	0
331	48	1	92	170	31.8339	1	0	0	1	0	0	0.8	1	0.2	0	0	0	0	0	0	1	1	25	1	1	2	1	1	1	1	0	65	2	2	1	0	8	0	0	0	365	0	0
332	74	1	106	171	36.2505	1	2	2	1	2	0	0.98	1.4	0.42	0	0	1	0	0	0	1	1	13.5	1	1	1	2	0	1	1	0	50	3	0	1	0	9	1	0	1	142	1	0
333	81	1	71	157	28.8044	0	1	0	1	0	1	2.2	2.8	0.6	0	1	1	0	0	0	4	1	13.4	0	1	2	3	0	1	1	0	60	1	0	0	0	7	1	0	0	365	1	0
334	47	1	76	169	26.6097	0	2	0	0	0	0	0.96	1.2	0.24	0	0	0	0	0	0	1	1	14.9	0	1	2	3	0	1	1	0	62	1	0	1	0	9	0	0	0	365	0	0
335	81	0	67	152	28.9993	0	0	0	1	0	0	0.8	1	0.2	0	0	0	0	0	0	4	2	12.3	0	0	2	3	0	1	1	0	0	3	0	1	0	46	0	27	1	27	0	0
336	75	1	71	170	24.5675	0	0	0	1	2	0	0.83	1	0.17	0	1	0	0	0	0	3	0	13	0	0	2	3	0	1	1	0	50	1	0	0	0	12	0	133	1	133	0	0
337	54	1	65	172	21.9713	0	2	0	0	0	0	0.78	0.9	0.12	0	0	0	0	0	0	1	1	13	0	0	2	3	0	1	1	0	0	2	2	1	0	5	0	0	0	365	0	0
338	52	1	102	185	29.8028	0	2	0	1	0	0	0.8	1.07	0.27	0	0	0	0	0	0	1	1	13.6	1	1	2	2	0	1	1	0	55	2	2	1	0	7	0	0	0	365	0	0
339	73	0	86	169	30.111	1	0	0	1	2	0	0.9	1.1	0.2	0	0	0	0	0	0	2	3	12.7	1	1	1	2	0	1	1	0	45	2	2	2	0	7	0	0	0	365	0	0
340	85	1	84	167	30.1194	1	2	0	0	0	0	0.99	1.4	0.41	1	0	1	0	0	0	1	1	9.9	1	0	2	1	1	1	2	1	35	2	2	1	0	13	1	0	0	365	1	0
341	87	1	103	170	35.6401	1	0	0	1	0	0	1.15	1.7	0.55	1	1	1	0	0	0	2	3	12.8	1	0	1	2	0	1	1	0	45	1	0	2	0	12	0	0	0	365	1	0
342	75	0	98	164	36.4366	1	2	0	1	2	0	0.9	1.2	0.3	0	0	0	0	0	0	1	1	14	1	1	2	1	1	1	1	0	0	2	1	1	0	6	0	0	0	365	0	0
343	79	0	75	155	31.2175	1	0	0	1	0	0	0.7	0.83	0.13	1	0	0	0	0	1	1	1	10.2	0	1	2	3	0	1	1	0	65	3	0	1	0	23	0	0	0	365	0	0
344	34	1	86	180	26.5432	0	2	0	0	0	0	0.8	1.2	0.4	0	0	1	0	0	0	1	1	14	1	0	2	2	0	1	1	0	50	1	0	2	0	22	0	5	1	5	1	0
345	69	0					0	0	1	2	0	0.58	0.7	0.12	0	0	0	0	0	1	1	1	12	1	0	2	1	1	1	1	0	45	1	0	2	0	13	0	0	0	365	0	0
346	72	1	95	167	34.0636	1	1	0	1	0	0	0.9	1.1	0.2	0	0	0	0	0	0	1	1	17.1	0	0	2	3	0	1	1	0	55	1	0	2	0	11	0	57	1	57	0	0
347	56	1	87	170	30.1038	1	2	2	1	0	0	0.6	0.8	0.2	0	0	0	0	1	0	1	1	15.9	1	1	2	2	0	1	1	0	60	2	2	1	0	10	0	0	0	365	0	0
348	75	0					0	0	1	2	0	1.1	1.3	0.2	0	0	0	0	0	0	1	1	12.6	0	0	2	3	0	1	1	0	75	1	0	0	0	5	0	0	0	365	0	0
349	52	0	47	158	18.8271	0	0	0	1	0	0	0.6	1.1	0.5	0	0	1	0	0	0	1	1	15.7	1	0	2	2	0	1	2	1	30	1	0	1	0	8	0	0	0	365	1	0
350	57	1	72	174	23.7812	0	0	0	1	2	0	0.5	0.8	0.3	0	0	1	0	0	0	1	1	15.3	1	0	2	2	0	1	1	0	45	2	2	1	0	18	0	0	0	365	1	0
351	53	0	67	165	24.6097	0	1	0	0	0	0	0.6	1	0.4	0	1	1	1	0	0	1	1	12.7	1	0	2	1	1	2	2	1	40	2	1	1	0	26	0	0	0	365	3	3
352	51	1	86	182	25.963	0	2	0	0	0	0	0.7	0.8	0.1	0	0	0	1	0	0	1	1	16.5	1	1	2	2	0	1	1	0	0	2	2	1	0	6	0	0	0	11	2	0
353	79	1	78	168	27.6361	0	0	0	1	2	1	1.26	1.7	0.44	0	1	1	1	0	0	4	2	14	1	1	2	2	0	2	1	0	45	1	0	2	0	6	0	13	1	13	3	4
354	76	0	75	164	27.8852	0	0	0	1	0	0	0.76	0.8	0.04	0	0	0	0	0	0	1	1	12.7	0	0	2	3	0	1	1	0	55	1	0	0	0	5	0	0	0	365	0	0
355	61	0	59	166	21.4109	0	2	0	1	0	0	0.7	1.3	0.6	0	0	1	0	0	0	2	2	13.3	1	1	2	1	1	1	1	0	65	2	1	1	0	23	0	0	0	365	1	0
356	69	1	68	176	21.9525	0	2	1	0	0	0	0.8	1.1	0.3	1	0	1	0	0	0	1	1	9.9	1	1	2	3	0	1	1	0	60	1	0	0	0	7	0	124	1	124	1	0
357	79	0					0	0	1	0	0	0.7	1.1	0.4	0	0	1	0	0	0	1	1	12.8	1	1	2	1	1	1	2	1	35	1	0	2	1	6	0	0	1	6	1	0
358	61	0	89	163	33.4977	1	0	0	1	1	1	2.6	3.3	0.7	1	0	1	0	0	0	1	1	9.4	1	1	2	2	0	1	1	0	50	3	0	2	0	54	0	40	1	40	1	0
359	59	1	75	175	24.4898	0	1	0	0	0	0	1.02	1.3	0.28	0	1	0	0	0	0	2	3	14.3	0	0	2	3	0	1	1	0	45	1	0	2	0	5	0	0	0	365	0	0
360	47	1	83	165	30.4867	1	2	2	0	0	0	0.7	0.9	0.2	1	0	0	0	0	0	1	1	12.6	1	0	2	1	1	1	1	0	0	2	1	1	0	15	0	0	0	365	0	0
361	74	0	83	158	33.2479	1	0	0	1	2	0	0.7	1	0.3	0	0	1	0	0	0	1	1	13.6	1	1	2	2	0	1	1	0	55	2		1	0	7	0	0	0	365	1	0
362	59	1	83	175	27.102	0	2	2	0	0	0	0.7	0.89	0.19	0	0	0	0	0	0	1	1	15	1	1	2	1	1	1	3	1	25	3	0	1	0	33	0	196	1	196	0	0
363	78	1	78	173	26.0617	0	1	0	0	0	0	1	1.2	0.2	0	0	0	0	1	0	1	1	16.4	1	0	2	1	1	1	1	0	0	2	0	1	1	14	0	0	1	14	0	0
364	58	0	82	158	32.8473	1	0	0	1	0	0	0.74	0.74	0	0	1	0	0	0	0	1	1	13.9	0	1	2	3	0	1	1	0	55	3	0	1	0	15	0	0	0	365	0	0
365	37	0	54	167	19.3625	0	2	0	0	0	0	0.55	0.9	0.35	1	0	1	0	0	0	1	1	11.8	1	0	1	2	0	1	1	0	65	2	2	1	0	5	0	0	0	365	1	0
366	78	0	81	156	33.284	1	0	0	1	2	0	1.37	1.86	0.49	1	0	1	0	0	0	1	1	11.4	0	0	2	3	0	1	0		0	0	0	0	0	13	0	0	0	365	1	0
367	70	0	59	163	22.2063	0	0	0	1	0	0	0.6	0.7	0.1	0	0	0	0	0	0	1	1	12.3	0	0	2	3	0	1	1	0	63	2	2	1	0	5	0	0	0	365	0	0
368	65	1	80	160	31.25	1	2	2	0	0	0	0.7	0.9	0.2	0	0	0	0	0	0	1	1	15.4	1	1	2	1	1	1	1	0	45	2	2	1	0	7	1	0	0	365	0	0
369	66	0	65	158	26.0375	0	0	0	1	0	0	0.7	1	0.3	0	0	1	0	0	0	4	1	13	1	1	2	2	0	1	1	0	0	2	2	1	0	11	0	0	0	365	1	0
370	84	0	53	150	23.5556	0	0	0	1	2	0	1	1.4	0.4	1	0	1	0	0	0	4	3	11	0	0	2	3	0	1	1	0	65	1	0	0	0	8	0	208	1	208	1	0
371	76	1	86	171	29.4108	0	0	0	1	0	1	1.4	2	0.6	0	0	1	0	0	0	1	1	14.4	0	0	2	3	0	1	1	0	50	2	2	1	0	7	0	0	0	365	1	0
372	84	1	85	178	26.8274	0	0	0	0	0	0	1.02	1.2	0.18	0	0	0	0	0	0	1	1	14.5	1	0	2	2	0	1	1	0	60	2	1	1	0	5	0	0	0	365	0	0
373	74	0	65	155	27.0552	0	0	0	1	2	0	0.9	1.1	0.2	0	0	0	0	0	0	4	4	14	0	1	2	3	0	1	1	0	0	1	0	0	0	1	0	0	0	365	0	0
374	41	0	72	176	23.2438	0	2	0	0	0	0	0.63	0.85	0.22	1	0	0	0	0	0	1	1	12	1	0	2	2	0	1	1	0	60	1	0	0	0	34	1	63	1	63	0	0
375	68	1	85	171	29.0688	0	2	0	0	0	0	0.8	0.8	0	0	1	0	0	0	0	1	1	15.4	0	1	2	3	0	1	1	0	61	1	0	2	0	7	0	0	0	365	0	0
376	67	0	65	158	26.0375	0	0	0	1	0	0	1.2	2.9	1.7	0	0	1	0	0	0	1	1	14.6	1	1	2	2	0	1	2	1	40	2	0	0	1	2	0	0	1	2	1	0
377	28	1					0	0	0	0	0	0.9	1.1	0.2	0	0	0	0	0	0	2	1	14	1	0	2	1	1	1	1	0	70	0	0	0	1	3	0	0	1	3	0	0
378	73	0	80	165	29.3848	0	0	0	1	2	0	1.6	3.7	2.1	1	1	1	1	0	0	1	1	12.5	1	0	2	2	0	4	3	1	30	2	1	2	1	2	0	0	1	2	3	4
379	46	0	62	157	25.1532	0	1	0	0	0	0	0.6	0.9	0.3	0	0	1	0	0	0	2	2	13.9	0	1	2	3	0	1	1	0	0	1	0	1	0	1	0	0	0	365	1	0
380	76	1	60	165	22.0386	0	0	0	1	0	0	0.9	1.1	0.2	1	0	0	1	0	0	2	2	10.1	1	1	2	1	1	2	1	0	45	2	2	1	0	22	1	0	1	172	2	0
381	76	1	74	159	29.271	0	1	0	1	0	0	1	1.3	0.3	1	0	1	0	0	0	1	1	11.7		0	2	3	0	1	1	0	60	2	1	1	0	11	1	0	0	365	1	0
382	65	1	65	160	25.3906	0	2	2	1	0	0	0.8	1.1	0.3	0	0	1	0	0	0	3	2	14	1	1	2	2	0	1	1	0	60	2	2	2	0	8	0	214	1	214	1	0
383	80	1	75	171	25.6489	0	0	0	1	2	0	1	1.5	0.5	0	0	1	0	0	0	5	2	13.4	0	0	2	3	0	1	1	0	65	2	2	1	0	4	0	0	0	365	1	0
384	66	1	115	179	35.8915	1	1	0	1	0	0	0.7	0.9	0.2	0	0	0	0	0	0	1	1	15.3	1	0	2	1	1	1	1	0	55	1	0	0	0	11	0	0	0	365	0	0
385	67	1	88	165	32.3232	1	0	0	1	0	1	1.3	1.7	0.4	0	0	1	1	0	0	2	2	13.6	1	1	2	2	0	2	2	1	35	1	0	1	0	21	0	323	1	323	3	3
386	72	1	78	172	26.3656	0	1	0	0	2	0	0.87	1	0.13	0	0	0	0	0	0	3	2	15.8	0	0	2	3	0	1	1	0	65	2	1	1	0	5	0	0	0	365	0	0
387	60	1	104	185	30.3871	1	1	0	1	2	0	0.7	1	0.3	0	0	1	0	0	0	1	1	13	1	1	2	1	1	1	2	1	35	2	2	2	0	8	0	0	0	365	1	0
388	64	1	60	175	19.5918	0	0	0	1	2	0	1	1.3	0.3	0	0	1	0	0	1	1	1	15	0	1	2	3	0	1	1	0	60	2	2	1	0	5	0	0	0	365	1	0
389	68	1	86	170	29.7578	0	1	1	0	0	0	0.5	1.3	0.8	1	0	1	0	0	0	1	1	12.5	1	0	2	1	1	1	1	0	45	2	1	1	0	13	1	21	1	21	1	0
390	61	0	71	165	26.079	0	2	2	1	2	0	0.7	0.9	0.2	1	0	0	0	0	0	1	1	11	1	1	2	2	0	1	1	0	55	3	0	1	0	11	0	90	1	90	0	0
391	77	0	83	162	31.6263	1	0	0	1	2	0	0.6	0.7	0.1	0	0	0	0	0	0	1	1	13.1	1	1	2	2	0	1	1	0	80	2	1	2	0	7	0	23	1	23	0	0
392	47	1	125	180	38.5802	1	2	0	1	2	0	0.92	1	0.08	0	0	0	0	0	0	1	1	16.8	1	1	2	2	0	1	1	0	65	1	0	2	0	8	0	0	0	365	0	0
393	57	1	90	169	31.5115	1	2	2	1	2	0	0.6	1.3	0.7	1	0	1	0	0	0	1	1	10.9	1	1	2	1	1	1	2	1	39	2	1	2	0	26	1	0	0	365	1	0
394	80	1	74	174	24.4418	0	1	0	0	0	0	0.69	1	0.31	1	0	1	0	1	0	3	3	12.4	1		2	2	0	1	1	0	60	2	2	2	0	32	0	0	0	365	1	0
395	68	1	102	178	32.1929	1	1	0	1	0	0	1.2			0	0	0	0	0	0	1	1	0	0	0	0	3	0	1	0		0	2	2	1	0	1	0	195	1	195	0	0
396	59	0	104	162	39.6281	1	0	0	1	0	0	0.9	1	0.1	0	0	0	0	0	0	1	1	14.9	1	1	2	1	1	1	0		0	3	0	1	0	0	0	38	1	38	0	0
397	71	1	95	175	31.0204	1	0	0	1	2	0	0.7	1.1	0.4	1	0	1	1	1	0	1	1	11.5	1	1	2	1	1	3	1	0	45	3	0	1	0	3	0	0	0	365	3	4
398	66	0	56	155	23.3091	0	2	1	1	0	0	0.64	1.2	0.56	0	0	1	0	0	1	1	1	12.6	1	1	2	1	1	1	1	0	60	2	2	1	0	9	0	0	0	365	1	0
399	77	1	89	176	28.7319	0	1	0	1	2	0	0.9	1.1	0.2	0	0	0	0	1	0	1	1	14.8	1	1	2	1	1	1	1	0	0	1	0	0	0	3	0	0	0	365	0	0
400	57	0	71	150	31.5556	1	2	0	1	2	0	0.6	0.8	0.2	0	0	0	0	0	0	4	2	14.3	0	1	2	3	0	1	1	0	0	2	2	1	0	7	0	346	1	346	0	0
401	86	0	75	165	27.5482	0	0	0	1	2	0	0.7	1.2	0.5	0	0	1	1	0	0	1	1	13.6	1	1	2	1	1	4	1	0	60	2	1	2	0	20	1	0	0	365	3	4
402	74	1	74	170	25.6055	0	2	0	1	0	0	0.6	0.9	0.3	0	0	1	0	0	0	1	1	14	1	0	2	1	1	1	2	1	40	2	2	1	0	7	0	0	0	365	1	0
403	49	1	82	174	27.0842	0	2	2	0	0	0	0.6	0.9	0.3	0	0	1	0	0	0	1	1	16.4	1	0	2	2	0	1	1	0	65	2	2	1	0	12	0	0	0	365	1	0
404	69	0	75	156	30.8185	1	0	0	1	2	0	0.74	1	0.26	0	0	0	0	0	0	2	1	13	0	1	2	3	0	1	1	0	65	2	2	1	0	5	0	0	0	365	0	0
405	62	0	69	156	28.3531	0	0	0	1	0	0	0.79	1.1	0.31	0	0	1	0	0	0	1	1	13	1	0	2	1	1	1	1	0	60	2	2	1	0	6	0	0	0	365	1	0
406	65	0	70	152	30.2978	1	1	0	1	2	1	1.2	3.2	2	0	0	1	0	0	1	4	3	12.1	1	1	2	2	0	1	1	0	0	1	0	0	0	7	1	0	1	161	1	0
407	46	0	82	164	30.4878	1	2	0	1	2	0	0.5	0.7	0.2	1	0	0	0	0	0	1	1	7.1	1	1	2	2	0	1	1	0	65	2	1	1	0	9	0	0	0	365	0	0
408	72	1	98	175	32	1	1	0	0	2	0	0.9	1	0.1	1	0	0	1	0	0	2	1	12.9	1	1	2	1	1	2	1	0	75	2	2	1	0	9	0	0	0	365	2	0
409	84	0	69	163	25.9701	0	0	0	0	0	0	0.5	0.8	0.3	0	0	1	1	0	0	1	1	13.7	1	0	2	1	1	2	2	1	35	2	2	2	0	8	0	0	0	365	3	3
410	48	1	80	185	23.3747	0	0	0	1	0	0	1	1.3	0.3	0	0	1	0	0	0	1	1	13.3	1	0	2	1	1	1	1	0	43	3	0	2	0	41	0	0	0	365	1	0
411	69	1	68	169	23.8087	0	2	0	1	2	0	0.8	1.1	0.3	0	0	1	0	0	0	3	1	15.4	1	0	1	2	0	1	1	0	50	2	2	1	0	4	0	0	0	365	1	0
412	79	1	85	180	26.2346	0	1	0	1	2	0	1.1	1.3	0.2	0	0	0	1	0	1	2	1	15.4	1	1	2	2	0	4	2	1	35	3	0	1	0	1	0	0	0	365	2	0
413	68	1					0	0	1	2	1	1.5	1.8	0.3	0	0	1	0	0	0	1	1	13	0	1	2	3	0	1	1	0	0	3	0	1	0	28	0	0	0	365	1	0
414	60	1	70	165	25.7117	0	1	0	1	0	0	0.76	0.95	0.19	0	0	0	0	0	0	1	1	16.1	0	1	2	3	0	1	1	0	0	0	0	0	0	5	0	0	0	365	0	0
415	66	1	71	178	22.4088	0	1	0	0	0	0	0.8	1	0.2	0	0	0	0	0	0	1	1	14.6	1	1	2	2	0	1	1	0	65	2	2	1	0	6	0	0	0	365	0	0
416	70	1	78	178	24.6181	0	0	0	0	2	0	0.8	0.8	0	0	0	0	0	0	0	1	1	13	0	0	2	3	0	1	1	0	65	3	0	0	0	27	0	0	0	365	0	0
417	37	1	115	187	32.8863	1	0	0	1	0	0	0.9	1.1	0.2	0	0	0	0	0	0	1	1	15.2	0	1	1	3	0	1	1	0	65	1	0	2	0	7	0	0	0	365	0	0
418	75	1					0	0	1	0	0	1.2	2.1	0.9	0	0	1	0	0	0	1	1	15	1	0	2	1	1	1	0		0	1	0	0	1	6	0	0	1	6	1	0
419	64	1	73	177	23.3011	0	2	0	0	0	0	1.4	2.06	0.66	0	0	1	1	0	0	1	1	16	1	0	2	1	1	4	0		0	3	0	1	0	1	0	0	0	365	3	4
420	70	1	80	175	26.1224	0	0	0	1	0	1	1.1	1.4	0.3	0	0	0	1	0	0	2	2	13.3	1	1	2	1	1	2	3	1	20	2	2	2	0	24	0	3	1	3	2	0
421	68	1	85	170	29.4118	0	0	0	0	2	0	0.6	1.2	0.6	0	0	1	0	0	0	1	1	13.4	1	0	1	1	1	1	2	1	30	1	0	0	1	9	0	0	1	9	1	0
422	68	1					2	0	1	0	1	1.2	1.52	0.32	1	1	1	1	0	0	2	3	9.6	1	0	1	2	0	2	1	0	45	1	0	0	0	13	1	0	1	3	3	3
423	56	0	62	163	23.3355	0	0	0	1	2	0	0.48	0.6	0.12	0	0	0	0	0	0	1	1	14.1	0	1	2	3	0	1	1	0	0	3	0	1	0	33	0	0	0	365	0	0
424	66	1	87	174	28.7356	0	1	0	0	0	0	0.6	0.9	0.3	0	0	1	0	0	0	3	2	16	1	1	2	2	0	1	1	0	0	2	2	2	0	7	0	0	0	365	1	0
425	71	1	62	159	24.5243	0	1	0	0	0	0	1.1	1.6	0.5	0	0	1	0	0	0	1	1	14	0	0	2	3	0	1	1	0	61	0	0	0	0	10	0	1	1	1	1	0
426	72	1	79	178	24.9337	0	0	0	0	0	0	0.9	1.1	0.2	0	0	0	0	0	0	2	3	13.2	1	0	2	2	0	1	1	0	50	0	0	0	0	3	0	0	0	365	0	0
427	76	0	65	160	25.3906	0	0	0	0	0	0	0.67	0.8	0.13	0	0	0	0	0	0	1	1	12.6	1	0	2	1	1	1	1	0	45	2	2	1	0	65	1	0	0	365	0	0
428	69	1	90	177	28.7274	0	0	0	1	2	0	1.1	3.4	2.3	1	0	1	0	0	0	3	0	9.9	1	0	2	2	0	1	2	1	35	1	0	2	0	109	1	0	0	365	1	0
429	73	0	80	150	35.5556	1	0	0	1	2	0	1	1.2	0.2	0	0	0	1	0	0	1	1	14.4	1	1	2	1	1	3	1	0	45	3	0	1	0	2	1	0	0	365	2	0
430	52	1	107	177	34.1537	1	1	1	1	0	0	0.9	0.95	0.05	0	0	0	0	0	0	1	1	15.9	0	0	2	3	0	1	1	0	45	3	0	0	0	4	0	0	0	365	0	0
431	67	0	70	155	29.1363	0	0	0	0	2	0	0.57	0.7	0.13	0	0	0	0	0	0	1	1	15.6	0	0	2	3	0	1	1	0	65	1	0	0	0	13	0	36	1	36	0	0
432	68	1	117	185	34.1855	1	0	0	0	0	0	0.9	0.9	0	0	0	0	0	1	0	1	1	15.5	0	1	2	3	0	1	1	0	0	3	0	1	0	3	0	0	0	365	0	0
433	68	0	105	150	46.6667	1	0	0	0	2	0	0.8	1.1	0.3	0	0	1	0	0	0	5	2	12.6	0	0	2	3	0	1	1	0	65	2	2	1	0	10	0	0	0	365	1	0
434	60	0	73	160	28.5156	0	0	0	1	2	0	0.52	0.8	0.28	0	0	0	0	0	0	2	1	13.9	1	1	2	1	1	1	1	0	45	2	2	1	0	8	0	0	0	365	0	0
435	63	1	90	167	32.2708	1	2	0	1	0	0	0.77	1	0.23	0	0	0	0	0	0	1	1	17	1	1	2	2	0	1	1	0	68	2	2	2	0	6	0	0	0	365	0	0
436	55	0					0	0	1	0	0	0.7	0.8	0.1	0	0	0	0	0	0	1	1	13.7	1	0	2	2	0	1	1	0	55	1	0	0	0	3	0	0	0	365	0	0
437	75	1	96	173	32.0759	1	1	0	0	0	0	0.76	1	0.24	0	0	0	0	0	0	1	1	13.6	0	0	2	3	0	1	1	0	69	3	0	1	0	17	0	0	0	365	0	0
438	46	1	84	171	28.7268	0	2	0	1	0	0	0.7	1.1	0.4	0	0	1	0	0	0	1	1	16	1	0	2	1	1	1	2	1	40	2	2	1	0	5	0	0	0	365	1	0
439	81	0	63	153	26.9127	0	1	0	1	0	0	0.5	0.7	0.2	1	0	0	0	0	0	1	1	10.1	1	1	2	1	1	1	2	1	35	2	2	1	0	9	0	0	0	365	0	0
440	69	1	75	166	27.2173	0	0	0	1	0	0	0.96	1.1	0.14	0	0	0	0	0	0	1	1	14.5	1	1	2	2	0	1	1	0	0	2	2	1	0	5	0	0	0	365	0	0
441	80	1	80	175	26.1224	0	2	0	0	0	0	1.3	2.5	1.2	0	0	1	0	0	0	1	1	15	1	0	2	1	1	1	1	0	65	2	2	2	0	12	1	0	0	365	1	0
442	60	1	80	160	31.25	1	2	0	0	2	0	0.7	1.1	0.4	0	0	1	0	0	0	1	1	13.6	1	0	2	1	1	1	2	1	30	1	2	2	0	8	0	0	0	365	1	0
443	61	1	80	166	29.0318	0	1	0	1	2	0	0.89	1	0.11	0	0	0	0	0	0	2	2	13.9	1	1	2	2	0	1	1	0	60	2	2	1	0	8	0	0	0	365	0	0
444	83	0					0	0	1	2	0	1.2	2	0.8	0	0	1	1	0	0	2	3	12.7	1	0	2	2	0	2	2	1	35	1	0	2	0	10	1	0	0	365	3	4
445	78	1	68	165	24.977	0	0	0	1	2	0	1	1.4	0.4	0	0	1	0	0	0	1	1	16.6	1	1	2	2	0	1	1	0	45	2	2	1	0	10	0	0	0	365	1	0
446	81	0	76	150	33.7778	1	0	0	1	2	1	0.74	1.4	0.66	1	0	1	1	0	0	1	1	11.9	0	1	2	3	0	3	1	0	74	3	0	1	0	20	0	0	0	365	3	4
447	43	1	92	167	32.9879	1	1	0	1	2	0	0.58	0.9	0.32	0	0	1	0	0	0	1	1	15.8	1	1	2	1	1	1	1	0	62	2	2	1	0	6	0	0	0	365	1	0
448	83	0	65	165	23.8751	0	0	0	1	0	0	0.51	0.61	0.1	1	0	0	0	0	0	1	1	11.5	1	1	2	1	1	1	2	1	40	2	1	1	0	12	0	0	0	365	0	0
449	49	0	82	156	33.6949	1	1	0	1	0	0	0.4	0.7	0.3	0	0	0	0	0	0	5	2	13.4	0	1	2	3	0	1	1	0	0	2	1	1	0	6	0	0	0	365	0	0
450	73	1	70	167	25.0995	0	0	0	1	2	0	0.9	1.6	0.7	0	0	1	1	0	1	1	1	14.9	1	1	1	2	0	3	2	1	40	3	0	0	0	14	1	0	0	365	3	4
451	75	1	90	173	30.0712	1	1	0	1	0	0	1.4	1.7	0.3	0	0	1	0	0	0	1	1	14.5	1	0	2	1	1	1	1	0	60	2	2	1	0	23	0	0	0	365	1	0
452	64	1	76	174	25.1024	0	2	0	1	2	0	0.8	0.9	0.1	0	0	0	0	0	0	5	1	14.6	1	0	2	2	0	1	1	0	60	1	0	0	0	11	0	0	0	365	0	0
453	69	1	80	168	28.3447	0	0	0	1	0	0	1	1.1	0.1	0	0	0	0	0	0	1	1	13.2	0	1	2	3	0	1	1	0	60	3	0	1	0	19	0	0	0	365	0	0
454	74	1					0	0	1	2	1	1.3	2.4	1.1	1	0	1	0	0	0	1	1	11.5	1	1	2	2	0	3	2	1	40	1	0	2	1	6	0	0	1	6	1	0
455	62	1					2	0	0	0	0	0.7	0.7	0	0	0	0	0	0	0	1	1	14.8	0	0	2	3	0	1	1	0	50	1	0	0	0	7	0	14	1	14	0	0
456	66	0	85	158	34.049	1	0	0	1	2	0	0.68	0.8	0.12	0	0	0	0	0	0	1	1	13	0	1	2	3	0	1	1	0	65	3	0	1	0	6	0	0	0	365	0	0
457	51	1	112	180	34.5679	1	2	2	1	0	0	0.7	1.1	0.4	0	0	1	0	0	0	5	0	15	1	0	2	2	0	1	1	0	0	0	0	0	0	8	0	0	0	365	1	0
458	43	1	104	177	33.1961	1	2	0	0	0	0	0.83	1.1	0.27	0	0	0	0	0	0	1	1	17.5	1	0	2	1	1	1	1	0	0	1	0	0	0	9	0	265	1	265	0	0
459	35	1	103	182	31.0953	1	2	0	0	0	0	0.8	1.4	0.6	0	0	1	0	0	0	1	1	15.4	1	0	2	1	1	1	1	0	45	3	0	1	0	56	0	0	0	365	1	0
460	63	1	100	178	31.5617	1	1	0	1	2	0	0.5	0.9	0.4	0	1	1	0	0	0	3	3	14.4	1	1	2	2	0	1	1	0	46	1	0	0	0	9	0	0	0	365	1	0
461	70	1	76	172	25.6896	0	1	0	0	0	0	0.7	0.93	0.23	0	0	0	0	0	0	3	3	13	0	1	2	3	0	1	2	1	30	2	2	1	0	7	0	0	0	365	0	0
462	87	0	48	141	24.1437	0	0	0	0	0	0	0.5	0.8	0.3	0	0	1	0	0	0	1	1	13.8	1	0	2	2	0	1	1	0	60	1	0	0	0	5	1	0	0	365	1	0
463	83	1	92	180	28.3951	0	1	0	0	0	1	1.3	1.6	0.3	0	0	1	0	0	0	4	3	14.6	0	1	2	3	0	1	1	0	60	2	2	2	0	9	0	70	1	70	1	0
464	76	1	76	163	28.6048	0	0	0	1	2	0	0.95	1.4	0.45	0	1	1	0	0	0	4	4	15	1	0	2	2	0	1	1	0	60	2	2	1	0	4	1	0	0	365	1	0
465	81	1					0	0	1	2	0	0.8	2.06	1.26	0	0	1	0	0	0	1	1	15	1	0	2	1	1	1	2	1	35	1	0	2	0	4	0	0	0	365	1	0
466	55	1	85	172	28.7317	0	2	2	0	0	0	0.8	1.1	0.3	0	0	1	0	0	0	1	1	14	1	0	2	1	1	1	3	1	25	2	2	1	0	9	0	153	1	153	1	0
467	64	0	73	170	25.2595	0	0	0	1	2	0	0.39	0.4	0.01	0	0	0	0	0	0	1	1	14.1	1	0	1	2	0	1	1	0	65	2	2	1	0	4	0	0	0	365	0	0
468	55	1	93	175	30.3673	1	1	1	1	0	0	1.2	1.5	0.3	0	0	1	0	0	0	1	1	13.8	1	1	2	1	1	1	2	1	35	2	1	1	0	6	1	0	0	365	1	0
469	77	1	83	176	26.7949	0	1	0	1	0	0	0.9	1.1	0.2	0	0	0	0	0	0	5	2	15.5	1	1	2	1	1	1	1	0	0	1	0	0	0	8	1	0	0	365	0	0
470	67	0	86	160	33.5937	1	0	0	1	2	0	0.92	1.7	0.78	1	0	1	0	0	0	1	1	10.3	1	1	2	2	0	1	1	0	60	2	2	1	0	21	0	0	0	365	1	0
471	70	0	58	162	22.1003	0	1	0	1	0	0	0.7	0.8	0.1	0	0	0	0	0	0	1	1	13.9	1	1	2	2	0	1	1	0	60	2	2	1	0	11	0	0	0	365	0	0
472	78	1	89	173	29.737	0	2	0	0	0	0	0.8	1.15	0.35	0	0	1	0	0	0	1	1	15.7	0	0	2	3	0	1	1	0	70	2	2	2	0	3	0	0	0	365	1	0
473	84	0	63	155	26.2227	0	0	0	1	0	0	1.4	2.2	0.8	0	0	1	1	0	0	3	1	15	1	0	1	1	1	4	2	1	40	1	0	0	1	4	0	0	1	4	3	4
474	72	1	87	171	29.7527	0	0	0	1	0	0	0.82	1.1	0.28	0	0	0	0	1	0	4	1	14	0	1	2	2	0	1	1	0	66	3	0	1	0	23	0	0	0	365	0	0
475	30	1	68	159	26.8977	0	2	0	0	0	0	0.7	0.9	0.2	0	0	0	0	0	0	1	1	14.8	1	0	2	2	0	1	1	0	0	1	0	0	0	6	0	0	0	365	0	0
476	63	1	65	161	25.0762	0	0	0	0	0	0	0.8	1	0.2	0	0	0	0	0	0	1	1	15	0	0	2	3	0	1	1	0	0	2	1	1	0	7	0	0	0	365	0	0
477	69	1	82	171	28.0428	0	2	0	0	0	0	0.8	0.95	0.15	1	0	0	0	0	0	1	1	12.3	0	0	2	3	0	1	1	0	60	2	1	1	0	49	1	0	0	365	0	0
478	57	1	81	162	30.8642	1	1	0	0	2	0	0.7	1.1	0.4	0	1	1	0	0	0	1	1	14	0	0	2	3	0	1	1	0	50	1	0	2	0	6	0	353	1	353	1	0
479	85	1	70	173	23.3887	0	0	0	0	0	0	1	1.1	0.1	0	0	0	1	0	0	4	1	13.3	1	0	2	1	1	4	0		0	1	0	0	1	1	0	0	1	1	2	0
480	65	1	75	169	26.2596	0	1	0	1	2	0	0.66	0.9	0.24	0	0	0	0	0	1	1	1	13.2	1	0	1	1	1	1	1	0	60	2	2	1	0	11	0	0	0	365	0	0
481	62	0	80	150	35.5556	1	0	0	1	2	0	0.6	0.7	0.1	0	0	0	0	0	0	2	2	16.3	1	1	1	2	0	1	1	0	50	2	2	2	0	10	1	0	0	365	0	0
482	67	0	60	148	27.3923	0	0	0	1	0	0	0.52	0.8	0.28	0	0	0	0	0	0	1	1	14.4	0	1	2	3	0	1	1	0	60	3	0	1	0	41	0	0	0	365	0	0
483	69	0					0	0	0	0	0	0.8	1.1	0.3	0	0	1	1	0	0	1	1	13.2	1	0	2	2	0	2	2	1	40	1	0	2	0	11	1	0	1	43	3	3
484	65	1	72	170	24.9135	0	1	0	1	0	0	1	1.1	0.1	0	0	0	0	0	0	2	3	13.1	0	1	2	3	0	1	1	0	45	1	0	0	0	2	1	120	1	120	0	0
485	73	1					1	0	1	0	0	1.1	1.48	0.38	1	1	1	1	1	0	1	1	10.7	1	1	2	1	1	3	1	0	45	0	0	0	0	16	0	0	0	365	3	3
486	48	1	99	172	33.464	1	2	0	1	0	0	0.9	1	0.1	1	0	0	0	0	0	1	1	12.6	0	0	2	3	0	1	1	0	64	2	1	1	0	16	0	0	0	365	0	0
487	72	1	80	165	29.3848	0	0	0	1	2	0	0.8	1.1	0.3	1	0	1	0	0	1	4	2	12.2	1	1	2	1	1	1	1	0	45	2	2	2	0	21	0	0	0	365	1	0
488	63	1	96	180	29.6296	0	2	0	0	2	0	1.5	2.2	0.7	0	0	1	0	0	1	1	1	15.6	1	0	2	1	1	1	1	0	50	2	2	1	0	31	0	49	1	49	1	0
489	77	1	90	168	31.8878	1	1	0	1	0	1	1.3	1.5	0.2	0	0	0	0	0	0	4	3	16.5	1	1	2	3	0	1	1	0	63	1	0	0	0	6	1	0	0	365	0	0
490	62	1	91	172	30.7599	1	1	0	1	2	1	1	1.3	0.3	0	0	1	0	1	0	1	1	14.1	1	1	2	2	0	1	1	0	50	2	2	1	0	7	0	0	0	365	1	0
491	72	0	83	165	30.4867	1	0	0	1	2	0	0.7	1.1	0.4	1	0	1	0	0	0	2	3	11	1	1	2	1	1	1	3	1	25	2	2	2	0	10	0	0	0	365	1	0
492	64	0	52	160	20.3125	0	0	0	1	0	0	0.7	0.87	0.17	0	0	0	0	0	0	1	1	14.4	0	0	2	3	0	1	1	0	65	3	0	1	0	64	0	0	0	365	0	0
493	67	1					2	0	0	0	0	1.1	1.98	0.88	1	0	1	0	0	0	1	1	12.4	1	0	1	2	0	1	1	0	63	1	0	0	0	37	1	0	0	365	1	0
494	50	1	100	182	30.1896	1	1	2	1	0	0	0.6	0.8	0.2	0	1	0	0	0	0	3	2	14.3	1	1	2	1	1	1	1	0	60	2	0	1	0	24	0	333	1	333	0	0
495	57	1	82	160	32.0312	1	1	0	1	2	0	0.69	1.1	0.41	0	0	1	1	0	0	2	2	15	1	0	2	3	0	3	2	1	35	2	2	1	0	8	0	124	1	124	3	4
496	66	0	98	168	34.7222	1	0	0	1	2	0	0.7	1.1	0.4	0	0	1	0	0	0	4	3	13	0	1	2	3	0	1	1	0	65	1	0	2	0	13	0	0	0	365	1	0
497	51	1	120	174	39.6354	1	0	0	1	2	0	0.62	0.8	0.18	0	0	0	0	0	0	4	3	0	0	1	2	3	0	1	1	0	50	1	0	2	0	12	0	153	1	153	0	0
498	68	0	67	158	26.8386	0	0	0	1	0	0	0.5	0.9	0.4	0	0	1	0	0	0	1	1	13.7	1	1	2	1	1	1	1	0	59	3	0	2	0	33	0	0	0	365	1	0
499	57	1					0	0	0	2	0	0.9	1.5	0.6	1	0	1	0	0	0	1	1	11.7	1	0	2	1	1	1	0		0	0	0	0	1	28	0	0	1	28	1	0
500	92	1	80	170	27.6817	0	0	0	0	0	1	1.2	1.5	0.3	1	0	1	0	0	0	1	1	11.8	1	0	2	1	1	1	1	0	62	2	1	2	0	33	1	0	0	365	1	0
501	61	0	59	158	23.634	0	2	0	1	0	0	0.7	1	0.3	0	0	1	1	0	0	1	1	15.1	1	0	2	2	0	2	2	1	40	2	2	1	0	16	0	0	0	365	3	3
502	74	1	68	165	24.977	0	0	0	1	0	1	2.4	3.3	0.9	1	1	1	1	0	1	3	1	11.5	1	0	2	2	0	2	1	0	60	2	1	1	0	7	0	15	1	15	3	4
503	73	1	92	172	31.0979	1	2	0	1	2	1	1.1	1.5	0.4	0	0	1	0	0	1	1	1	15.3	1	0	2	1	1	1	1	0	45	3	0	0	0	3	0	135	1	135	1	0
504	47	1	99	180	30.5556	1	2	0	1	0	0	0.8	1.11	0.31	0	0	1	0	0	0	1	1	15.3	1	1	2	1	1	1	1	0	65	2	2	1	0	14	0	0	0	0	1	0
505	61	1	75	168	26.5731	0	2	0	0	0	0	1	1.3	0.3	0	0	1	0	0	0	2	1	15.4	1	0	2	2	0	1	1	0	60	3	0	1	0	14	0	0	0	365	1	0
506	70	1	90	155	37.461	1	0	0	1	2	0	1.07	1.6	0.53	0	0	1	0	0	0	3	1	13.8	0	0	1	3	0	1	1	0	0	2	2	2	0	9	0	0	0	365	1	0
507	45	1					0	0	1	0	0	0.87	1	0.13	0	0	0	0	0	0	1	1	16	1	1	2	2	0	1	1	0	65	1	0	0	0	6	0	0	0	365	0	0
508	65	1	70	165	25.7117	0	2	0	1	2	0	0.7	1.1	0.4	0	0	1	0	0	0	1	1	14.4	1	0	2	1	1	1	1	0	50	2	2	1	0	10	0	0	0	365	1	0
509	63	1	85	172	28.7317	0	2	2	1	2	0	0.8	1.2	0.4	0	0	1	0	0	0	1	1	16	1	1	2	1	1	4	2	1	35	3	0	1	0	0	0	0	0	365	1	0
510	45	1	83	169	29.0606	0	2	2	1	0	0	0.5	0.9	0.4	0	0	1	0	0	0	1	1	16	1	0	2	2	0	1	1	0	70	2	2	1	0	7	0	0	0	365	1	0
511	72	0	80	165	29.3848	0	0	0	1	0	0	0.7	0.9	0.2	1	0	0	0	0	0	1	1	11.9	1	0	2	2	0	1	1	0	65	2	1	1	0	9	0	0	0	365	0	0
512	73	1	84	170	29.0657	0	2	0	1	0	1	1.2	2.4	1.2	1	0	1	1	0	0	1	1	11.8	1	0	1	1	1	4	2	1	40	2	0	1	1	9	0	0	1	9	3	4
513	67	1	79	162	30.1021	1	1	0	1	0	0	0.83	1.2	0.37	1	1	1	0	0	1	4	2	12.9	0	1	2	3	0	1	1	0	65	3	0	0	0	22	0	29	1	29	1	0
514	73	1					2	2	1	0	0	0.8	1	0.2	0	0	0	0	0	0	1	1	15.6	1	1	2	2	0	1	1	0	45	2	1	1	0	5	0	0	0	365	0	0
515	73	1	89	172	30.0838	1	0	0	1	0	0	0.6	1.1	0.5	0	0	1	0	0	0	1	1	14.7	1	0	2	1	1	1	1	0	60	2	2	2	0	6	0	0	0	365	1	0
516	44	1	106	180	32.716	1	1	1	1	0	0	0.6	0.9	0.3	0	0	1	0	0	0	2	2	15.5	1	0	1	1	1	1	1	0	45	2	2	1	0	10	0	0	0	365	1	0
517	85	1	82	174	27.0842	0	2	0	1	2	0	1.1	1.1	0	1	0	0	0	0	0	1	1	10.6	1	0	2	1	1	1	1	0	60	2	2	2	0	7	0	0	0	365	0	0
518	62	1					1	2	1	0	0	1.1	2.8	1.7	0	1	1	0	0	1	5	2	16	0	1	2	3	0	1	1	0	55	1	0	0	0	12	1	0	1	193	1	0
519	72	0	60	158	24.0346	0	0	0	1	0	0	0.9	2.7	1.8	1	0	1	1	0	0	1	1	10.4	1	0	2	1	1	3	1	0	60	2	1	1	1	26	0	0	1	26	3	4
520	51	1	87	170	30.1038	1	0	0	1	0	0	0.8	1.1	0.3	0	0	1	0	0	0	1	1	15	0	1	2	3	0	1	1	0	79	2	2	1	0	5	0	137	1	137	1	0
521	69	1	77	172	26.0276	0	1	0	0	2	0	0.5	1	0.5	0	0	1	0	0	0	2	1	14.7	1	1	2	2	0	1	1	0	0	2	2	1	0	8	0	0	0	365	1	0
522	84	0	67	152	28.9993	0	0	0	1	0	0	1	1.6	0.6	1	1	1	1	0	0	3	3	10.7	1	1	1	2	0	2	1	0	55	0	0	0	0	11	0	150	0	365	3	4
523	81	1	87	164	32.3468	1	1	0	0	2	0	1.1	1.4	0.3	0	0	0	0	0	0	2	1	14	0	1	2	3	0	1	1	0	55	2	2	1	0	8	0	0	0	365	0	0
524	67	0	60	160	23.4375	0	0	0	0	0	0	0.6	0.8	0.2	1	0	0	0	0	0	1	1	11.8	1	0	2	1	1	1	2	1	40	2	2	2	0	14	0	0	0	365	0	0
525	68	0	73	144	35.2045	1	0	0	1	2	1	1	1.56	0.56	1	0	1	0	0	0	2	2	10.9	1	1	2	2	0	1	2	1	37	2	2	2	0	33	0	210	1	210	1	0
526	63	1	65	156	26.7094	0	0	0	0	0	0	0.83	1.2	0.37	0	0	1	0	0	0	1	1	14.7	1	0	2	1	1	1	1	0	40	2	2	2	0	8	0	0	0	365	1	0
527	81	0					0	0	1	2	0	0.6	1	0.4	1	1	1	0	0	1	4	1	12.1	0	0	2	3	0	1	1	0	60	1	0	0	0	28	0	0	0	365	1	0
528	78	0	68	158	27.2392	0	0	0	1	2	0	0.7	1.33	0.63	1	0	1	1	0	0	1	1	10.9	1	1	2	2	0	4	1	0	45	1	0	2	1	38	0	0	1	38	3	4
529	64	1	96	170	33.218	1	0	0	1	2	1	1.5	2.3	0.8	0	0	1	0	1	0	2	2	17.6	0	1	2	3	0	1	1	0	60	2	2	2	0	22	0	0	0	365	1	0
530	74	1					0	0	0	2	1	3.3	3.3	0	0	0	0	1	0	0	4	1	13.5	1	0	2	1	1	4	0		0	1	0	2	1	0	0	0	1	1	2	0
531	79	1	79	175	25.7959	0	1	0	1	0	0	0.8	0.9	0.1	0	0	0	0	0	0	1	1	14	0	0	2	3	0	1	1	0	44	2	2	1	0	31	0	0	0	365	0	0
532	63	1	68	165	24.977	0	0	0	1	0	1	1.5	1.9	0.4	0	0	1	0	0	0	4	3	13.9	0	1	2	3	0	1	1	0	50	2	2	2	0	10	0	0	0	365	1	0
533	71	1	81	159	32.0399	1	1	0	1	0	0	0.7	0.9	0.2	0	0	0	0	0	0	1	1	14	1	1	2	2	0	1	1	0	50	2	2	1	0	7	0	176	1	176	0	0
534	77	0	154	68	333.045	1	0	0	0	0	0	0.6	0.8	0.2	0	0	0	0	0	0	4	2	12.4	0	1	2	3	0	1	1	0	67	3	0	1	0	13	0	0	0	0	0	0
535	76	0					0	0	1	2	0	0.8	1.1	0.3	0	0	1	1	0	0	3	3	15.9	0	1	2	3	0	3	1	0	60	1	0	2	0	7	1	0	0	365	3	3
536	71	1	68	168	24.093	0	1	0	1	2	0	0.7	0.9	0.2	0	0	0	0	0	0	1	1	15.4	0	1	1	3	0	1	1	0	60	3	0	1	0	60	0	0	0	206	0	0
537	81	1	67	168	23.7387	0	0	0	0	2	0	0.7	1.2	0.5	0	0	1	0	0	0	1	1	15.4	0	1	2	3	0	1	1	0	65	1	0	2	0	7	0	0	0	365	1	0
538	76	1	78	170	26.9896	0	0	0	1	2	1	4.1	11.4	7.3	1	0	1	0	0	0	1	1	9	1	0	1	2	0	1	1	0	45	2	2	2	0	7	1	45	1	45	1	0
539	78	0	63	158	25.2363	0	0	0	1	0	0	1	1.1	0.1	0	0	0	0	0	0	1	1	13.4	1	1	2	2	0	1	1	0	65	2	2	2	0	9	0	0	0	365	0	0
540	63	1	82	160	32.0312	1	0	2	1	0	0	0.7	0.9	0.2	0	0	0	0	0	0	1	1	14.4	1	0	1	1	1	1	1	0	55	2	1	1	0	10	0	0	0	365	0	0
541	71	1					1	0	1	2	0	0.88	1	0.12	0	1	0	0	0	0	4	3	13	1	0	2	1	1	1	1	0	0	2	2	2	0	7	0	0	0	365	0	0
542	74	1	82	168	29.0533	0	0	0	1	2	0	1.2	1.79	0.59	1	0	1	0	1	0	1	1	12.1	0	1	2	3	0	1	1	0	55	1	0	1	0	4	0	0	0	365	1	0
543	82	1					1	0	1	2	0	0.9	1.3	0.4	0	0	1	0	1	0	3	3	13.9	0	1	2	3	0	1	1	0	52	1	0	0	0	3	0	0	0	365	1	0
544	69	0	60	151	26.3146	0	1	0	1	2	0	0.8	0.8	0	0	0	0	0	0	0	2	1	15	0	1	2	3	0	1	1	0	0	3	0	0	0	19	0	0	0	365	0	0
545	76	0	45	145	21.4031	0	2	0	1	0	1	1.03	1.54	0.51	1	1	1	1	1	0	2	1	11	1	1	2	2	0	2	1	0	45	1	0	2	0	26	0	18	1	18	3	4
546	80	0	75	157	30.4272	1	0	0	1	0	0	0.9	1.1	0.2	0	0	0	0	0	0	1	1	13.1	0	1	2	3	0	1	1	0	65	1	0	1	0	9	0	0	0	365	0	0
547	55	1					0	0	1	2	1	0.7	1.3	0.6	0	0	1	0	0	0	4	3	15.4	1	1	2	2	0	1	1	0	61	2	2	2	0	4	0	0	0	365	1	0
548	73	0	64	151	28.0689	0	0	0	1	0	0	0.7	0.79	0.09	0	0	0	1	0	1	2	1	16.3	0	1	2	3	0	2	2	1	40	3	0	0	0	10	1	0	0	365	2	0
549	85	0					0	0	1	2	0	1.1	1.5	0.4	0	0	1	0	0	0	0	3	13	1	1	2	2	0	1	1	0	60	1	0	0	0	7	1	0	1	107	1	0
550	49	1	89	176	28.7319	0	2	0	0	0	0	0.6	1.1	0.5	0	0	1	0	0	0	2	1	15.5	0	1	2	3	0	1	1	0	0	2	1	1	0	5	0	0	0	365	1	0
551	70	0	83	162	31.6263	1	0	0	1	2	0	0.6	1	0.4	0	0	1	0	0	0	1	1	15.4	1	1	1	2	0	1	2	1	40	2	2	2	0	16	0	243	1	243	1	0
552	83	0	69	150	30.6667	1	0	0	1	2	0	0.8	1	0.2	0	0	0	0	0	0	3	1	12	1	1	2	2	0	1	1	0	60	1	0	0	0	7	0	0	0	187	0	0
553	51	1	97	176	31.3146	1	1	0	1	0	0	0.9	1.3	0.4	1	0	1	0	0	0	1	1	12.5	1	1	2	1	1	1	1	0	60	2	1	1	0	8	0	0	0	365	1	0
554	59	1	68	158	27.2392	0	2	2	1	2	1	2	3.9	1.9	1	1	1	1	1	0	1	1	9.4	1	1	2	2	0	2	1	0	46	2	1	2	0	21	0	0	0	365	3	4
555	86	1					1	0	1	0	0	0.78	0.9	0.12	1	0	0	0	0	0	4	1	12.1	0	1	2	3	0	1	1	0	65	0	0	0	0	5	0	0	0	365	0	0
556	72	1	71	174	23.4509	0	1	0	1	2	0	0.56	1.1	0.54	0	0	1	0	0	0	2	3	14.5	1	1	1	2	0	1	2	1	35	1	0	0	0	35	1	0	0	365	1	0
557	58	0	71	163	26.7229	0	0	0	1	2	0	0.7	1.12	0.42	1	0	1	0	0	1	1	1	10.9	1	0	2	1	1	1	1	0	60	2	2	1	0	16	0	14	1	14	1	0
558	69	0	69	155	28.7201	0	0	0	1	0	0	0.56	0.8	0.24	0	0	0	0	0	0	1	1	12.8	1	1	2	2	0	1	1	0	45	2	2	1	0	8	0	0	0	365	0	0
559	72	1	83	168	29.4076	0	1	2	1	0	0	0.77	1.5	0.73	0	0	1	1	0	0	4	2	14.6	1	1	2	1	1	2	1	0	45	2	2	1	0	9	0	0	0	365	3	4
560	68	0	68	160	26.5625	0	0	0	1	0	0	0.7	0.91	0.21	0	0	0	0	0	0	1	1	12.9	1	1	2	1	1	1	1	0	45	2	2	1	0	15	0	0	0	365	0	0
561	67	1	96	186	27.7489	0	2	0	0	0	0	0.6	0.81	0.21	0	0	0	0	0	0	1	1	14.7	1	1	2	1	1	1	1	0	60	2	1	2	0	16	0	0	0	365	0	0
562	49	1	96	176	30.9917	1	2	0	0	0	0	0.9	1.1	0.2	0	0	0	0	0	0	2	3	14.5	0	1	2	2	0	1	2	1	40	0	0	2	0	7	0	0	0	365	0	0
563	74	1	87	167	31.1951	1	0	0	1	0	0	1	1.1	0.1	0	0	0	0	0	0	3	2	15.3	1	0	2	2	0	1	1	0	64	2	1	1	0	4	0	0	0	365	0	0
564	57	1	80	170	27.6817	0	2	0	0	0	0	0.7	1	0.3	0	0	1	0	0	0	1	1	13	1	0	2	1	1	1	2	1	30	2	2	1	0	6	0	0	0	365	1	0
565	82	0	83	162	31.6263	1	0	0	1	0	0	0.8	0.92	0.12	0	0	0	0	0	1	1	1	14.6	0	0	2	3	0	1	1	0	61	1	0	0	0	31	0	0	0	365	0	0
566	48	1	96	170	33.218	1	0	0	1	0	1	1.1	1.7	0.6	0	0	1	0	0	0	1	1	17.1	0	0	2	3	0	1	1	0	62	2	2	2	0	11	0	0	0	365	1	0
567	58	1	94	176	30.3461	1	1	0	1	2	0	0.7	0.9	0.2	1	1	0	0	0	1	1	1	15.9	1	1	2	1	1	1	1	0	60	2	1	1	0	9	0	27	1	27	0	0
568	66	1	85	169	29.7609	0	2	2	1	0	0	0.9	1.1	0.2	0	0	0	0	0	0	1	1	16.3	1	1	2	1	1	1	1	0	69	2	1	1	0	11	0	0	0	365	0	0
569	73	1	90	170	31.1419	1	1	0	0	2	1	1.8	4.7	2.9	1	1	1	1	0	0	2	3	11	1	1	2	2	0	3	1	0	62	2	2	2	0	22	1	36	1	36	3	4
570	50	1	64	165	23.5078	0	2	0	0	0	0	0.8	1.2	0.4	0	0	1	0	0	0	1	1	14.4	1	0	1	2	0	1	1	0	0	2	2	1	0	11	0	157	1	157	1	0
571	78	1	78	166	28.306	0	0	0	1	2	0	1.1	1.8	0.7	1	1	1	0	0	0	1	1	10.8	0	1	2	3	0	1	2	1	35	1	0	0	0	9	1	0	0	365	1	0
572	68	1	93	173	31.0735	1	1	2	1	0	0	0.8	1	0.2	0	0	0	0	0	0	2	0	17.8	1	0	2	2	0	1	2	1	40	2	2	2	0	8	0	0	0	365	0	0
573	52	1	100	179	31.21	1	0	0	1	2	0	0.8	0.9	0.1	0	0	0	0	0	0	3	2	14.3	1	1	2	2	0	1	1	0	55	2	2	1	0	8	0	0	0	365	0	0
574	75	1	78	160	30.4687	1	2	0	1	2	0	0.76	1.3	0.54	1	0	1	0	0	0	1	1	11	1	1	2	2	0	1	1	0	45	2	1	2	0	16	1	0	1	198	1	0
575	83	1	80	172	27.0416	0	1	0	1	2	0	0.8	1.1	0.3	1	0	1	0	0	0	1	1	12.1	1	1	2	2	0	1	1	0	0	2	2	2	0	3	0	0	0	365	1	0
576	78	1	85	172	28.7317	0	0	0	1	0	1	1.1	1.3	0.2	1	0	0	0	0	1	1	1	12.4	1	1	2	2	0	2	1	0	55	1	0	2	0	9	0	0	0	365	0	0
577	77	0	89	154	37.5274	1	0	0	1	0	0	1.1	1.53	0.43	1	0	1	0	0	0	3	2	9.6	0	1	2	3	0	1	1	0	71	2	2	1	0	13	0	0	0	365	1	0
578	35	1					0	0	0	0	0	0.8	1	0.2	0	0	0	0	0	0	1	1	14.4	0	0	2	2	0	1	1	0	45	2	0	2	0	7	0	0	0	365	0	0
579	39	0	55	153	23.4952	0	2	0	0	0	0	0.7	0.8	0.1	0	0	0	0	0	0	1	1	12.7	1	0	2	2	0	1	1	0	0	2	2	1	0	8	0	0	0	365	0	0
580	71	1	60	160	23.4375	0	1	0	1	0	0	0.88	1.3	0.42	1	0	1	1	0	0	1	1	12.7	1	1	2	1	1	3	3	1	30	2	2	1	0	3	1	0	1	45	3	4
581	73	1	76	170	26.2976	0	2	0	0	0	1	1.1	1.6	0.5	0	1	1	0	0	0	2	3	13.6	1	1	2	2	0	1	1	0	50	1	0	2	0	12	0	0	0	365	1	0
582	76	0	77	155	32.0499	1	0	0	1	0	1	1.3	1.7	0.4	0	0	1	0	0	0	1	1	15	0	0	2	3	0	1	1	0	70	2	1	2	0	9	0	0	0	365	1	0
583	65	0	75	177	23.9395	0	1	0	1	0	0	0.58	1	0.42	0	0	1	0	0	0	1	1	14	0	0	2	3	0	1	1	0	80	2	1	1	0	11	0	93	1	93	1	0
584	74	0	100	153	42.7186	1	0	0	1	0	0	0.8	1.2	0.4	0	0	1	0	0	0	3	3	13	1	1	2	3	0	1	1	0	45	1	0	2	0	12	1	0	0	365	1	0
585	50	1	93	188	26.3128	0	1	0	1	0	0	0.8	1.1	0.3	0	0	1	0	0	0	2	2	13.3	0	1	2	3	0	1	1	0	60	3	0	2	0	13	0	0	0	365	1	0
586	81	0	74	152	32.0291	1	0	0	1	2	0	0.8	1.5	0.7	1	0	1	0	0	0	1	1	11.9	1	1	2	2	0	1	1	0	55	1	0	2	0	47	0	149	1	149	1	0
587	81	1	73	171	24.9649	0	0	0	1	0	0	1.4	1.7	0.3	0	0	1	0	0	0	1	1	15.6	0	0	2	2	0	1	1	0	70	1	0	2	0	21	0	0	0	365	1	0
588	78	0					0	0	1	2	1	1.47	2.2	0.73	0	1	1	0	0	0	2	3	12	1	1	2	2	0	1	1	0	0	1	0	0	0	43	0	18	1	18	1	0
589	64	1	80	162	30.4832	1	0	0	1	2	1	1.29	3.5	2.21	1	0	1	1	0	0	1	1	10.7	1	0	2	2	0	3	2	1	30	3	0	0	0	50	1	22	1	22	3	4
590	77	0	75	165	27.5482	0	0	0	1	2	0	1.1	1.4	0.3	0	0	0	1	0	0	1	1	15.9	1	1	2	1	1	4	1	0	45	1	0	2	1	2	0	0	1	2	2	0
591	63	1	95	170	32.872	1	0	0	1	2	0	0.66	0.8	0.14	0	0	0	0	0	0	1	1	14.1	1	1	2	2	0	1	1	0	65	2	1	1	0	5	0	0	0	365	0	0
592	61	1	83	171	28.3848	0	2	0	1	0	0	0.7	0.9	0.2	0	0	0	0	0	0	1	1	14.1	1	1	2	2	0	1	1	0	69	2	2	2	0	6	0	0	0	365	0	0
593	77	0	66	161	25.462	0	0	0	1	2	0	1.1	1.2	0.1	0	0	0	0	0	0	1	1	12.7	0	0	2	3	0	1	1	0	60	1	0	2	0	10	1	0	0	365	0	0
594	63	1	80	168	28.3447	0	0	0	1	2	0	0.8	1.2	0.4	0	0	1	0	0	0	2	2	15	0	0	2	3	0	1	2	1	30	3	0	0	0	12	0	0	0	365	1	0
595	42	1	110	176	35.5114	1	2	0	1	0	0	0.7	0.8	0.1	0	1	0	0	0	0	1	1	14	1	1	2	2	0	1	1	0	55	2	0	1	0	4	0	0	0	365	0	0
596	91	1	60	155	24.974	0	0	0	0	0	1	1.2	1.3	0.1	1	0	0	0	0	0	1	1	11.8	1	1	2	1	1	1	1	0	60	2	1	2	0	5	1	0	0	365	0	0
597	70	1	84	126	52.9101	1	0	1	1	2	0	0.5	1.8	1.3	1	0	1	0	0	0	1	1	12.3	1	0	1	2	0	1	1	0	50	3	0	0	0	15	1	0	1	147	1	0
598	72	1	61	169	21.3578	0	0	0	1	2	0	0.75	0.9	0.15	1	0	0	0	0	0	1	1	11.4	1	1	2	1	1	1	2	1	37	3	0	1	0	55	0	0	0	365	0	0
599	64	0	108	167	38.7249	1	0	0	1	2	1	1.6	2.03	0.43	0	0	1	0	0	0	1	1	12.5	0	1	2	3	0	1	1	0	62	1	0	0	0	8	0	0	0	365	1	0
600	50	1	62	170	21.4533	0	2	2	0	0	0	0.8	1	0.2	0	0	0	0	0	0	1	1	14.2	1	0	2	1	1	1	2	1	35	2	2	1	0	7	0	0	0	365	0	0
601	70	1	108	169	37.8138	1	0	0	1	2	0	1.25	1.6	0.35	0	0	1	0	0	0	3	4	13.1	0	1	1	3	0	1	1	0	60	2	2	2	0	6	0	284	1	284	1	0
602	86	1					0	0	0	0	0	1.2	1.2	0	1	0	0	0	0	0	1	1	11.7	1	0	2	1	1	1	2	1	40	0	0	0	0	11	0	0	0	365	0	0
603	74	0	50	153	21.3593	0	0	0	0	0	0	0.5	1.2	0.7	0	0	1	0	0	0	1	1	13.4	1	0	2	1	1	1	1	0	50	2	2	1	0	22	0	0	0	365	1	0
604	55	0	95	164	35.3212	1	2	0	1	0	0	0.5	0.7	0.2	0	0	0	0	0	0	1	1	12.1	1	1	2	2	0	1	1	0	60	2	1	2	0	8	0	0	0	365	0	0
605	85	1					0	0	1	2	1	1.55	3	1.45	1	0	1	1	0	0	3	2	9.3	1	1	1	2	0	2	2	1	30	1	0	0	0	12	0	0	0	365	3	4
606	90	1					2	0	1	0	1	2.1	2.1	0	1	1	0	1	1	1	1	1	10.4	1	0	2	2	0	2	2	1	35	1	0	0	0	13	1	0	1	237	2	0
607	76	0	67	165	24.6097	0	0	0	1	0	0	0.5	0.7	0.2	1	0	0	0	0	0	1	1	10.2	1	0	2	2	0	1	1	0	60	3	0	1	0	51	0	0	0	365	0	0
608	57	1	67	172	22.6474	0	1	0	1	0	0	0.8	1	0.2	1	0	0	0	0	0	1	1	10.7	1	0	2	2	0	1	1	0	61	3	0	1	0	37	1	0	1	238	0	0
609	74	1	75	151	32.8933	1	2	0	1	2	0	0.9	1.2	0.3	0	0	0	0	0	0	1	1	15.7	0	1	2	3	0	1	1	0	66	3	0	1	0	16	0	0	0	365	0	0
610	52	1					2	0	1	2	0	0.8	1.2	0.4	0	0	1	1	1	0	1	1	16.9	1	1	2	1	1	3	0		0	0	0	0	1	5	0	0	1	5	3	3
611	80	1	95	173	31.7418	1	0	0	1	0	0	1.2	1.2	0	0	0	0	0	0	0	2	3	15.3	0	1	2	3	0	1	1	0	65	2	2	2	0	7	1	0	0	365	0	0
612	83	1	85	180	26.2346	0	1	0	1	2	0	1.28	1.7	0.42	0	0	1	0	0	0	1	1	14.7	0	1	2	3	0	1	1	0	50	1	0	0	0	6	1	0	1	121	1	0
613	56	1	74	165	27.1809	0	0	0	0	0	0	0.6	1	0.4	0	0	1	0	0	0	1	1	15	0	0	2	3	0	1	1	0	60	2	2	1	0	8	0	207	1	207	1	0
614	60	1	70	167	25.0995	0	2	2	0	0	0	0.8	0.9	0.1	0	0	0	0	0	0	1	1	17.7	0	0	2	3	0	1	1	0	65	2	1	1	0	2	0	0	0	365	0	0
615	63	1	89	167	31.9122	1	2	0	1	0	0	1.1	1.5	0.4	0	1	1	0	0	0	1	1	13.3	1	1	2	2	0	1	1	0	45	3	0	1	0	28	0	74	1	74	1	0
616	88	1					1	0	1	2	0	0.8	0.92	0.12	0	0	0	0	0	1	4	3	13.6	0	1	2	3	0	1	1	0	45	1	0	0	0	4	0	297	1	297	0	0
617	60	1	76	169	26.6097	0	1	0	0	0	0	0.5	0.8	0.3	0	0	1	0	0	0	2	2	15	1	0	2	3	0	1	1	0	65	2	1	1	0	6	0	0	0	365	1	0
618	56	1	80	167	28.6851	0	1	0	0	0	0	0.9	1.2	0.3	0	0	0	0	0	0	1	1	17	1	0	2	2	0	1	1	0	0	2	2	1	0	5	0	0	0	365	0	0
619	72	1	85	168	30.1162	1	1	2	1	2	0	0.8	1.1	0.3	1	0	1	1	1	0	1	1	11.4	1	1	1	2	0	3	1	0	65	2	2	1	0	14	0	86	1	86	3	3
620	84	0	58	161	22.3757	0	0	0	0	2	0	0.72	1	0.28	0	0	0	0	0	0		1	13.7	1	0	2	2	0	1	1	0	65	2	2	2	0	13	0	0	0	0	0	0
621	46	1	98	172	33.126	1	1	1	0	0	0	0.8	1	0.2	0	0	0	0	0	0	1	1	14	1	1	2	2	0	1	1	0	50	2	2	1	0	9	0	0	0	365	0	0
622	78	0	85	162	32.3884	1	0	0	1	0	0	0.8	0.9	0.1	0	0	0	0	0	0	1	1	14.1	0	0	2	3	0	1	1	0	0	1	0	2	0	8	0	0	0	365	0	0
623	65	0	75	150	33.3333	1	0	0	1	0	0	0.56	0.9	0.34	1	0	1	0	0	0	1	1	11	1	1	2	1	1	1	1	0	50	3	0	1	0	23	0	0	0	365	1	0
624	55	1	80	167	28.6851	0	2	2	0	0	0	0.7	1	0.3	1	1	1	0	0	1	1	1	12.5	1	0	2	1	1	1	2	1	38	2	2	1	0	12	0	0	0	365	1	0
625	68	0	46	146	21.58	0	0	0	1	2	1	1.2	2.6	1.4	1	1	1	1	0	0	4	4	8.3	1	1	2	1	1	2	0		0	2	0	2	0	21	1	65	1	68	3	4
626	81	1	65	171	22.2291	0	2	0	1	2	1	1	1.4	0.4	1	0	1	0	0	0	1	1	11.9	1	1	2	1	1	1	1	0	45	2	2	1	0	17	1	4	1	4	1	0
627	77	1	75	160	29.2969	0	0	0	1	2	1	1.4	2	0.6	1	0	1	0	0	0	3	1	8.7	1	0	2	1	1	1	1	0	65	2	1	1	0	28	1	0	0	365	1	0
628	73	1	80	165	29.3848	0	0	2	1	2	1	2.4	3.8	1.4	1	0	1	1	0	1	2	3	12.7	1	1	2	2	0	3	2	1	30	1	0	0	0	14	1	0	1	189	3	4
629	55	0	61	153	26.0584	0	0	0	1	2	1	2.8	6	3.2	0	0	1	0	0	1	3	1		0	1	1	3	0	1	1	0	65	0	0	2	0	22	0	0	0	365	1	0
630	71	1	82	175	26.7755	0	0	0	1	2	0	1	1.4	0.4	0	0	1	1	0	0	1	1	15	1	1	1	1	1	2	1	0	50	2	0	2	0	10	1	0	1	151	3	3
631	74	1	64	150	28.4444	0	1	1	0	2	0	0.6	0.9	0.3	0	0	1	0	0	0	1	1	14.2	1	0	2	2	0	1	1	0	60	1	0	2	0	23	0	0	0	365	1	0
632	56	1					2	2	1	2	0	0.77	1.3	0.53	0	0	1	0	0	0	1	1	13.7	1	1	2	1	1	1	1	0	50	1	0	0	0	13	0	0	0	365	1	0
633	59	1	69	160	26.9531	0	1	0	1	0	0	0.7	1.1	0.4	1	0	1	0	0	0	1	1	12.5	1	1	2	1	1	1	1	0	50	2	0	1	0	10	0	0	0	365	1	0
634	53	1	112	170	38.7543	1	1	0	1	2	0	0.75	0.8	0.05	0	0	0	0	0	0	1	1	14	0	0	2	3	0	1	1	0	65	2	2	2	0	2	0	16	1	16	0	0
635	50	1	77	168	27.2817	0	2	1	0	0	0	0.9	2.2	1.3	0	0	1	0	0	0	1	1	12.1	1	0	2	1	1	1	1	0	35	2	2	2	0	29	0	0	0	365	1	0
636	81	1	73	178	23.04	0	1	0	1	0	0	0.8	1.1	0.3	0	0	1	0	1	0	1	1	15.1	1	1	2	1	1	1	1	0	45	2	2	1	0	11	0	0	0	365	1	0
637	71	1	80	170	27.6817	0	1	0	1	2	0	0.8	1	0.2	0	0	0	1	0	0	1	1	13.3	1	1	2	1	1	3	2	1	35	2	1	2	0	25	0	59	1	59	2	0
638	71	1	76	170	26.2976	0	0	0	1	2	1	1.8	4.3	2.5	1	0	1	0	0	0	1	1	8.5	1	1	2	2	0	1	1	0	63	2	0	1	0	77	0	0	0	365	1	0
639	77	0	90	154	37.9491	1	0	0	1	2	0	0.9	1	0.1	0	0	0	1	0	0	3	1	13.6	1	1	2	2	0	2	1	0	50	0	0	0	0	4	1	0	0	365	2	0
640	73	1	78	163	29.3575	0	0	0	1	0	0	0.8	1.3	0.5	0	0	1	0	0	0	1	1	13.9	1	0	2	2	0	1	1	0	55	1	0	0	0	9	0	0	0	365	1	0
641	78	1	91	176	29.3776	0	1	0	1	2	0	0.9	1.3	0.4	0	0	1	0	0	0	1	1	14	1	0	2	1	1	1	1	0	50	3	0	0	0	13	1	0	0	365	1	0
642	79	0					0	0	1	0	0	0.9	1.3	0.4	1	0	1	1	0	1	1	1	9.1	1	0	2	2	0	2	1	0	60	1	0	0	0	7	1	0	1	202	3	3
643	74	1	62	170	21.4533	0	0	0	1	2	0	0.7	1	0.3	0	1	1	0	0	0	1	1	14.5	0	0	2	3	0	1	1	0	55	3	0	1	0	25	0	0	0	365	1	0
644	52	1	111	178	35.0335	1	2	0	1	2	0	0.7	1.1	0.4	0	0	1	1	0	0	1	1	13.5	0	1	1	3	0	2	1	0	60	2	2	1	0	15	0	0	0	365	3	4
645	74	1	70	170	24.2215	0	0	0	1	2	1	1.5	2	0.5	0	0	1	0	0	0	2	3	13.9	1	1	2	2	0	3	1	0	45	1	0	2	0	9	0	0	0	365	1	0
646	76	0	82	169	28.7105	0	0	0	1	2	1	1.8	4.1	2.3	1	0	1	1	0	0	1	1	10.8	1	1	2	1	1	4	3	1	20	1	0	2	1	4	0	0	1	4	3	4
647	81	1	86	164	31.975	1	1	1	1	0	0	1.1	1.3	0.2	0	0	0	0	0	0	2	1	13	0	0	2	3	0	1	1	0	70	1	0	0	0	10	0	0	0	278	0	0
648	75	0	48	152	20.7756	0	0	0	1	2	1	1.2	2.6	1.4	1	1	1	0	0	0	1	1	10	1	1	1	2	0	1	0		0	2	0	1	1	0	0	0	1	1	1	0
649	36	1					0	0	1	1	1	2.6	3.8	1.2	1	1	1	0	0	0	1	1	12.3	1	0	2	1	1	1	2	1	35	1	0	0	0	22	0	0	0	365	1	0
650	73	0	103	156	42.3241	1	0	0	1	2	0	0.8	0.9	0.1	0	0	0	0	0	0	1	1	13.1	0	1	2	3	0	1	1	0	60	1	0	2	0	7	0	0	0	365	0	0
651	63	0	69	155	28.7201	0	2	0	0	0	0	0.58	0.9	0.32	0	0	1	0	0	0	2	2	13.6	0	1	2	3	0	1	1	0	65	2	2	1	0	4	0	0	0	365	1	0
652	78	1					1	0	1	0	0	1.5	2.4	0.9	0	0	1	1	1	0	1	1	14.4	1	0	2	2	0	4	0		0	1	0	0	1	0	0	0	1	1	3	4
653	77	0					0	0	1	2	0	0.97	1	0.03	0	0	0	0	0	0	1	1	13	1	0	2	2	0	1	1	0	69	1	0	0	0	7	0	0	0	365	0	0
654	67	1					0	0	1	0	0	1.6	1.6	0	0	0	0	1	0	0	1	1	14.7	1	0	2	2	0	4	0		0	1	0	0	1	1	0	0	1	1	2	0
655	75	1					0	0	1	0	0	0.9	1.2	0.3	0	0	0	0	0	0	1	1	15.1	1	1	2	1	1	1	1	0	45	1	0	2	0	24	0	0	0	365	0	0
656	79	0	77	158	30.8444	1	0	0	1	2	0	0.9	1.2	0.3	0	0	0	0	0	0	1	1	15.6	1	1	2	1	1	1	2	1	35	2	2	1	0	6	0	0	0	365	0	0
657	65	0	70	168	24.8016	0	0	0	1	0	0	0.81	1	0.19	0	0	0	0	0	1	4	2	14	1	0	2	2	0	1	1	0	61	1	0	0	0	9	0	0	0	365	0	0
658	88	1					0	0	1	0	1	2.4	6.7	4.3	1	0	1	0	0	0	1	1	10.4	1	1	1	1	1	1	2	1	40	1	0	0	0	27	1	0	1	65	1	0
659	57	1	95	187	27.1669	0	1	0	1	0	0	1	1	0	0	0	0	0	0	1	1	1	15	0	1	2	3	0	1	1	0	55	2	2	1	0	4	0	0	0	365	0	0
660	54	1	80	175	26.1224	0	2	0	0	0	0	0.9	1.1	0.2	0	0	0	0	0	0	1	1	15.8	1	1	2	1	1	1	2	1	40	2	2	1	0	5	0	0	0	365	0	0
661	60	1	85	170	29.4118	0	2	0	1	2	0	0.87	1.6	0.73	0	0	1	0	0	1	2	2	14	0	0	2	3	0	1	1	0	50	1	0	0	0	6	0	215	1	215	1	0
662	54	1	85	175	27.7551	0	0	1	1	0	0	0.7	0.9	0.2	0	0	0	0	0	1	1	1	15	1	0	2	1	1	1	2	1	35	2	1	1	0	11	0	0	0	365	0	0
663	56	1	73	170	25.2595	0	1	0	0	2	0	0.9	1.1	0.2	0	0	0	0	0	0	2	0	16.7	1	1	2	2	0	1	1	0	50	2	2	1	0	11	0	0	0	27	0	0
664	65	1	78	180	24.0741	0	1	2	1	2	0	0.9	0.9	0	0	0	0	0	0	0	1	1	15	1	1	2	1	1	1	2	1	30	3	0	1	0	12	0	208	1	208	0	0
665	40	1					2	2	1	0	0	0.6	0.9	0.3	0	0	1	0	0	0	1	1	15	1	0	2	1	1	1	1	0	55	1	0	0	0	11	0	0	0	365	1	0
666	76	0	75	147	34.7078	1	0	0	1	2	0	0.6	0.9	0.3	1	0	1	0	0	0	3	2	10.3	1	1	2	2	0	1	2	1	35	2	1	2	0	12	1	196	1	196	1	0
667	60	0	90	178	28.4055	0	0	0	1	2	0	0.43	0.9	0.47	0	0	1	0	0	0	1	1	13	1	1	2	2	0	1	1	0	65	3	0	1	0	18	0	0	0	365	1	0
668	89	1					1	0	1	0	1	1.4	1.9	0.5	0	0	1	0	1	0	1	1	17	1	0	2	1	1	1	1	0	60	1	0	2	0	6	0	0	0	365	1	0
669	87	1					0	0	1	2	0	1.27	1.9	0.63	1	0	1	0	0	1	1	1	12.6	1	0	2	1	1	1	1	0	45	1	0	2	0	23	0	0	0	365	1	0
670	65	1	74	170	25.6055	0	0	0	1	2	0	0.9	1.6	0.7	1	0	1	0	0	0	3	3	12.4	1	1	2	2	0	1	1	0	68	1	0	2	0	12	1	0	0	365	1	0
671	71	0					1	0	1	0	0	0.8	1.1	0.3	0	0	1	0	1	0	1	1	13	1	1	2	2	0	1	1	0	60	1	0	0	0	7	0	0	0	365	1	0
672	84	0	66	159	26.1066	0	1	0	1	2	0	0.71	0.82	0.11	0	1	0	1	0	0	3	3	13.1	1	0	1	2	0	2	1	0	0	1	0	0	0	10	1	0	0	365	2	0
673	75	1	76	164	28.257	0	1	0	1	2	0	1.4	1.7	0.3	0	0	1	0	0	0	1	1	15.6	0	1	1	3	0	1	1	0	55	3	0	1	0	33	1	0	1	365	1	0
674	72	1	85	174	28.075	0	0	0	1	0	0	0.96	1.2	0.24	0	0	0	0	0	0	1	1	16	1	0	2	2	0	1	1	0	50	2	1	2	0	7	0	0	0	365	0	0
675	77	0	50	150	22.2222	0	0	0	0	2	1	1.2	2.1	0.9	0	0	1	1	0	0	1	1	13	1	0	2	2	0	2	1	0	45	2	2	1	0	11	1	0	0	365	3	4
676	64	1	79	171	27.0169	0	2	0	1	2	0	1	1.2	0.2	0	0	0	0	0	0	1	1	13.8	0	1	2	3	0	1	1	0	61	3	0	1	0	18	0	14	1	14	0	0
677	85	1	77	172	26.0276	0	0	0	0	0	1	1.09	1.7	0.61	0	0	1	0	0	0	4	1	13.6	1	0	2	2	0	1	1	0	60	1	0	0	0	2	1	0	0	365	1	0
678	80	0					0	0	1	2	0	0.6	1.9	1.3	1	0	1	0	0	0	1	1	11	0	1	2	3	0	1	1	0	0	1	0	2	0	8	0	0	0	365	1	0
679	68	1	95	172	32.112	1	1	0	0	2	0	0.7	1.4	0.7	1	0	1	0	0	0	1	1	9.2	1	0	2	2	0	1	1	0	45	3	0	0	0	59	1	0	1	26	1	0
680	52	1	107	180	33.0247	1	0	0	1	2	1	2.2	2.6	0.4	1	0	1	0	0	0	1	1	11	0	1	2	3	0	1	2	1	35	3	0	1	0	22	0	0	0	365	1	0
681	77	1	65	164	24.1672	0	1	0	1	0	0	0.9	1.2	0.3	1	0	0	0	0	0	1	1	12.6	1	1	2	2	0	1	1	0	65	2	2	1	0	7	0	0	0	365	0	0
682	71	1	75	168	26.5731	0	1	0	1	0	0	0.9	1.3	0.4	0	0	1	0	0	0	2	3	14	1	1	2	2	0	1	1	0	50	1	0	0	0	11	0	0	0	365	1	0
683	73	0	66	154	27.8293	0	0	0	1	2	0	0.95	1.5	0.55	0	0	1	0	0	0	1	1	13.8	1	0	2	1	1	1	1	0	65	1	0	1	0	10	0	0	0	365	1	0
684	47	1	92	176	29.7004	0	0	0	0	0	0	0.8	1	0.2	0	0	0	0	0	0	2	2	16.4	1	0	2	2	0	1	1	0	62	1	0	2	0	3	0	0	0	365	0	0
685	75	1	57	166	20.6852	0	1	0	0	0	0	1.07	1.4	0.33	0	0	1	0	0	0	2	2	14	0	0	2	3	0	1	1	0	40	3	0	1	0	11	0	137	1	137	1	0
686	79	1	76	174	25.1024	0	0	0	1	0	0	0.8	1.2	0.4	0	0	1	0	0	0	1	1	16	1	0	2	2	0	1	1	0	55	2	1	2	0	8	0	0	0	365	1	0
687	69	1	87	167	31.1951	1	1	0	1	2	1	5.5	10.3	4.8	1	0	1	1	0	0	5	1	9.5	1	1	1	2	0	3	1	0	45	3	0	1	0	41	0	11	1	11	3	4
688	71	1	74	165	27.1809	0	0	0	1	2	1	1	2.7	1.7	1	0	1	1	1	0	1	1	10.8	1	0	2	1	1	3	1	0	45	2	1	2	0	58	1	0	1	49	3	4
689	73	1	70	175	22.8571	0	1	0	1	2	0	0.6	1.2	0.6	0	0	1	0	0	0	2	2	13.3	1	1	2	1	1	1	3	1	30	2	2	1	0	14	1	0	0	365	1	0
690	78	1	85	174	28.075	0	0	0	0	0	0	0.7	0.88	0.18	0	0	0	0	0	0	2	1	13.6	1	0	2	2	0	1	1	0	60	2	2	2	0	7	0	0	0	365	0	0
691	79	1	70	177	22.3435	0	1	0	0	2	1	1.5	3.7	2.2	1	0	1	1	0	0	5	1	15.6	1	0	1	1	1	4	1	0	45	2	0	1	1	12	0	0	1	12	3	4
692	61	1					1	0	1	2	0	1	1.21	0.21	0	0	0	0	1	1	2	2	13.1	1	1	2	2	0	1	2	1	30	1	0	0	0	8	1	61	1	61	0	0
693	62	1	69	167	24.7409	0	2	0	0	0	1	1.1	1.5	0.4	0	1	1	0	0	0	1	1	16.4	1	1	2	1	1	1	1	0	50	2	1	1	0	10	0	0	0	365	1	0
694	57	1	61	170	21.1073	0	1	0	1	2	0	0.9	1.2	0.3	0	0	0	0	0	0	1	1	15	1	1	2	1	1	1	1	0	60	2	2	2	0	9	0	0	0	365	0	0
695	71	1					1	0	1	0	0	1	1.3	0.3	0	0	1	1	0	0	1	1	14.4	1	1	2	1	1	4	1	0	45	2	2	1	0	14	0	0	0	365	3	3
696	93	1					0	0	0	0	1	1.9	2.7	0.8	0	0	1	1	0	1	1	1	14	1	1	2	2	0	2	1	0	45	1	0	2	0	3	0	0	0	365	3	4
697	50	1	72	170	24.9135	0	2	2	0	0	0	0.6	0.9	0.3	0	0	1	1	0	0	1	1	15.4	1	0	2	1	1	4	2	1	30	0	0	0	0	4	1	9	1	9	3	3
698	73	0	70	155	29.1363	0	0	0	1	0	0	0.5	0.7	0.2	1	0	0	0	0	0	1	1	10.4	1	0	2	2	0	1	1	0	78	1	0	0	0	17	0	0	0	365	0	0
699	75	1					0	0	1	0	1	1.2	1.58	0.38	0	0	1	0	0	0	1	1	13.9	1	0	2	1	1	1	1	0	60	2	2	2	0	10	0	0	0	0	1	0
700	67	1	76	163	28.6048	0	1	0	1	0	0	0.91	1	0.09	0	0	0	0	0	0	1	1	14.3	0	0	2	3	0	1	1	0	60	0	0	0	0	21	0	0	0	365	0	0
701	72	1	65	163	24.4646	0	2	0	0	0	0	0.78	1	0.22	0	0	0	0	1	0	1	1	13.3	1	1	2	1	1	1	1	0	63	2	1	1	0	16	0	0	0	365	0	0
702	79	0					0	0	1	2	1	2.59	3.4	0.81	0	0	1	1	0	0	2	2	15.4	1	0	2	1	1	3	2	1	35	1	0	0	0	19	0	0	0	0	3	4
703	67	1	70	162	26.6728	0	1	0	1	0	0	0.93	1	0.07	1	0	0	0	0	0	5	1	12	0	1	2	3	0	1	1	0	0	3	0	0	0	26	0	0	0	365	0	0
704	71	1	110	173	36.7537	1	0	2	1	2	1	1.2	1.7	0.5	0	0	1	0	0	0	4	2	15	0	1	2	3	0	1	1	0	55	1	0	0	0	16	0	0	0	365	1	0
705	43	1	85	170	29.4118	0	2	2	0	0	0	0.7	0.82	0.12	0	0	0	0	0	0	3	2	14.2	1	1	2	1	1	1	2	1	35	2	2	1	0	5	0	0	0	365	0	0
706	53	1	82	175	26.7755	0	2	0	0	2	0	0.5	0.7	0.2	1	0	0	0	0	0	1	1	12.6	1	1	2	1	1	1	1	0	65	0	0	0	0	11	0	276	1	276	0	0
707	69	1	65	174	21.4692	0	2	0	1	0	0	0.8	1.1	0.3	0	0	1	0	0	0	1	1	15	1	0	2	2	0	1	1	0	60	2	1	1	0	6	0	0	0	365	1	0
708	71	1	119	164	44.2445	1	1	0	1	2	0	0.6	0.8	0.2	0	0	0	0	0	0	1	1	0	0	1	2	3	0	1	1	0	50	3	0	1	0	46	1	111	1	111	0	0
709	67	1	90	172	30.4218	1	1	0	1	0	0	0.8	0.98	0.18	0	0	0	0	0	0	1	1	15.3	1	1	2	2	0	1	1	0	0	2	1	1	0	6	0	0	0	365	0	0
710	59	0	57	165	20.9366	0	2	0	0	0	0	0.5	1	0.5	0	0	1	0	0	0	1	1	13.1	1	0	2	1	1	1	1	0	65	2	1	2	0	8	0	0	0	365	1	0
711	81	0					0	0	1	0	0	1.1	1.1	0	1	0	0	0	0	0	1	1	11.8	1	1	2	1	1	1	1	0	60	1	0	2	0	6	1	0	0	365	0	0
712	80	0					0	0	1	2	0	1.5	3.1	1.6	1	0	1	1	0	0	1	1	8.5	1	1	2	1	1	3	1	0	62	1	0	2	0	22	0	0	0	365	3	4
713	57	1	90	176	29.0548	0	1	0	0	2	0	0.8	1	0.2	0	0	0	0	0	0	1	1	14.7	0	0	2	3	0	1	1	0	65	0	0	2	0	4	0	363	1	363	0	0
714	71	0					0	0	0	2	0	0.78	1.1	0.32	0	0	1	1	0	0	2	4	13.4	1	1	2	2	0	3	2	1	35	1	0	0	0	24	0	23	1	23	3	3
715	42	1	120	168	42.517	1	2	0	0	2	0	0.8	1.2	0.4	0	0	1	0	0	0	1	1	16	1	1	2	2	0	1	1	0	60	2	2	1	0	5	0	0	0	365	1	0
716	74	0	68	150	30.2222	1	0	0	1	0	0	0.8	1.3	0.5	0	1	1	0	0	0	1	1	13.6	1	1	2	2	0	1	1	0	0	2	1	1	0	7	0	0	0	365	1	0
717	74	1	95	175	31.0204	1	2	2	1	2	1	1.24	1.6	0.36	1	0	1	0	0	0	5	1	9	1	1	2	2	0	1	1	0	0	3	0	1	0	34	0	0	0	365	1	0
718	47	0	56	152	24.2382	0	2	2	1	0	0	0.6	0.9	0.3	0	0	1	0	0	1	1	1	13.6	1	1	2	1	1	1	1	0	55	2	2	1	0	14	0	26	1	26	1	0
719	78	0					0	0	1	2	1	1.8	2.6	0.8	0	0	1	1	0	0	1	1	14	1	0	2	1	1	2	1	0	0	1	0	2	0	7	1	0	1	151	3	4
720	46	1	105	178	33.1398	1	1	0	1	0	0	0.82	1.1	0.28	0	0	0	0	0	0	3	2	15	1	1	2	1	1	1	1	0	54	2	1	1	0	8	0	0	0	365	0	0
721	74	0	64	146	30.0244	1	0	0	1	0	0	0.5	0.7	0.2	0	0	0	0	0	0	1	1	12.8	1	1	2	2	0	1	1	0	62	2	1	1	0	8	0	0	0	365	0	0
722	59	1	100	175	32.6531	1	0	2	1	2	0	1.1	1.2	0.1	1	0	0	1	0	0	2	1	10.6	1	0	2	1	1	4	2	1	35	3		1	0	0	0	0	0	365	2	0
723	36	1	96	186	27.7489	0	2	0	1	0	0	0.8	0.9	0.1	0	0	0	0	0	0	1	1	17.2	1	0	2	1	1	1	1	0	59	2	2	1	0	6	0	0	0	365	0	0
724	84	1					1	0	1	2	1	2.3	3.37	1.07	1	1	1	0	1	0	3	1	8.7	1	0	2	1	1	1	1	0	60	1	0	0	0	26	1	62	1	62	1	0
725	78	1	73	165	26.8136	0	1	0	1	2	0	1.2	1.2	0	0	0	0	0	0	0	4	4	15.7	0	1	2	3	0	1	1	0	60	3	0	1	0	20	1	0	1	201	0	0
726	68	1	80	167	28.6851	0	1	0	1	0	1	1.4	1.9	0.5	1	0	1	0	1	0	4	5	11.6	0	1	2	3	0	1	1	0	60	3	0	0	0	24	0	0	0	365	1	0
727	58	0	86	164	31.975	1	0	0	1	2	0	0.7	0.9	0.2	0	0	0	0	0	0	1	1	14.3	1	1	1	1	1	1	1	0	60	2	1	1	0	7	0	0	0	365	0	0
728	62	1	82	169	28.7105	0	0	0	0	0	0	1.1	1.5	0.4	0	0	1	0	0	0	1	1	13.1	1	0	2	1	1	1	1	0	65	2	1	1	0	15	0	0	0	365	1	0
729	81	1					1	0	1	2	0	0.6	1.6	1	0	0	1	0	1	1	1	1	11.9	1	0	2	2	0	1	1	0	55	1	0	0	0	7	0	0	0	365	1	0
730	52	1	83	172	28.0557	0	2	0	0	2	0	0.65	0.8	0.15	0	0	0	0	0	0	1	1	14	0	0	2	3	0	1	1	0	0	2	2	1	0	6	0	0	0	365	0	0
731	69	1	68	156	27.9421	0	1	0	0	0	0	0.9	1.2	0.3	0	0	0	0	0	0	1	1	14.7	1	0	2	1	1	1	1	0	65	2	2	1	0	16	0	0	0	365	0	0
732	70	1					0	0	1	0	0	1	1.14	0.14	0	0	0	0	0	0	1	1	14.9	0	0	2	3	0	1	1	0	65	0	0	0	0	12	0	0	0	365	0	0
733	55	1	76	170	26.2976	0	0	2	1	2	0	0.5	0.7	0.2	0	0	0	0	0	0	1	1	16	1	1	1	2	0	1	1	0	50	2	2	2	0	9	0	0	0	365	0	0
734	85	0	70	158	28.0404	0	0	0	1	0	0	1.05	1.05	0	0	0	0	0	1	0	2	1	13	1	1	2	2	0	1	1	0	0	1	0	2	0	8	1	0	1	306	0	0
735	81	0	109	168	38.6196	1	0	0	1	0	0	0.53	0.9	0.37	1	0	1	0	0	1	1	1	10.9	1	0	1	1	1	1	2	1	35	2	2	2	0	12	0	0	0	365	1	0
736	57	1	90	170	31.1419	1	0	0	0	0	0	0.7	0.9	0.2	0	0	0	0	0	0	1	1	14.3	1	0	2	2	0	1	1	0	50	1	0	1	0	6	0	0	0	365	0	0
737	82	0					0	0	1	0	0	1	1.3	0.3	0	0	1	0	0	0	1	1	12.7	0	1	2	3	0	1	1	0	65	1	0	2	0	8	0	0	0	365	1	0
738	67	0	71	156	29.1749	0	2	0	1	0	0	0.7	0.9	0.2	0	0	0	0	1	0	1	1	13.1	1	1	2	1	1	1	1	0	35	2	2	1	0	17	0	0	0	365	0	0
739	72	0	59	157	23.9361	0	0	0	1	2	0	0.7	0.8	0.1	0	0	0	0	0	1	1	1	12.4	1	1	2	2	0	1	1	0	50	2	2	1	0	7	0	0	0	365	0	0
740	79	0	76	157	30.8329	1	0	0	0	0	0	0.77	1.2	0.43	1	0	1	0	0	0	1	1	11.7	1	0	2	2	0	1	1	0	60	1	0	1	0	8	0	0	0	365	1	0
741	45	1					2	1	0	0	0	0.9	1.2	0.3	0	0	0	0	0	0	1	1	13.7	1	1	2	2	0	1	1	0	60	2	1	1	0	12	0	0	0	365	0	0
742	66	1					1	0	1	0	0	0.8	1	0.2	1	0	0	0	0	0	2	3	11.9	0	0	2	3	0	1	1	0	45	1	0	0	0	12	0	0	0	365	0	0
743	63	1	79	170	27.3356	0	0	2	1	0	0	0.6	0.9	0.3	0	0	1	0	0	0	1	1	14.7	1	1	2	2	0	1	1	0	65	2	2	1	0	7	0	0	0	365	1	0
744	44	1					2	0	0	2	0	0.65	1	0.35	0	0	1	0	0	0	1	1	16.4	1	0	2	2	0	1	1	0	65	2	1	1	0	7	0	0	0	365	1	0
745	59	1	88	174	29.0659	0	2	0	1	2	0	0.84	1.2	0.36	1	0	1	1	1	0	5	4	11.9	1	1	2	1	1	2	1	0	55	2	2	1	0	9	0	86	1	86	3	3
746	71	1	105	177	33.5153	1	1	0	1	0	0	0.8	1.1	0.3	0	0	1	0	0	0	1	1	14.8	1	0	2	1	1	1	1	0	54	2	2	1	0	6	0	0	0	365	1	0
747	66	1	80	170	27.6817	0	2	0	1	2	0	0.8	1.5	0.7	0	0	1	0	0	0	1	1	13.9	1	0	2	2	0	1	2	1	40	3	0	1	0	8	0	0	0	365	1	0
748	79	0	67	157	27.1816	0	0	0	1	0	0	0.6	1.1	0.5	0	0	1	0	0	0	1	1	14.6	0	1	2	3	0	1	1	0	75	2	2	2	0	7	0	0	0	365	1	0
749	67	1	67	163	25.2174	0	0	0	0	2	1	4.9	7.7	2.8	1	1	1	0	0	0	3	2	10.1	1	1	1	2	0	1	1	0	45	2	2	2	0	25	1	0	1	216	1	0
750	83	0	72	158	28.8415	0	0	0	1	2	1	5.2	16	10.8	1	0	1	0	0	0	2	3	9.9	0	0	1	3	0	1	0		0	2	0	1	1	4	0	0	1	4	1	0
751	73	0	79	153	33.7477	1	0	0	1	2	0	0.77	1	0.23	0	0	0	0	0	1	1	1	14.8	1	1	2	2	0	1	1	0	70	1	0	0	0	15	0	0	0	365	0	0
752	61	0	58	157	23.5304	0	0	0	1	2	0	0.9	1.3	0.4	1	0	1	0	0	0	3	2	10	1	1	1	2	0	1	1	0	60	2	0	2	0	6	0	44	1	44	1	0
753	84	0	75	158	30.0433	1	0	0	1	0	0	0.6	0.92	0.32	0	0	1	0	0	0	1	1	14.2	0	0	2	3	0	1	1	0	0	2	2	1	0	13	0	0	0	365	1	0
754	76	0	118	152	51.0734	1	0	0	1	0	0	1.2	1.53	0.33	0	0	1	0	0	0	4	2	12	0	0	1	3	0	1	1	0	0	1	0	2	0	19	0	0	0	365	1	0
755	55	1	79	168	27.9904	0	2	0	0	0	0	0.8	1.2	0.4	0	0	1	0	1	0	1	1	14	0	0	2	3	0	1	1	0	0	1	0	1	0	6	0	0	0	365	1	0
756	53	1	100	180	30.8642	1	2	2	0	0	0	0.79	1.2	0.41	0	0	1	0	0	0	2	2	15	1	0	2	1	1	1	3	1	30	0	0	0	0	8	0	93	1	93	1	0
757	87	0	54	150	24	0	0	0	1	0	0	0.9	1.3	0.4	0	0	1	1	0	0	1	1	12.6	1	1	2	2	0	2	1	0	0	3	1	1	0	7	0	0	0	365	3	3
758	66	1	95	173	31.7418	1	0	2	1	0	0	0.8	1.1	0.3	0	0	1	0	0	0	1	1	16	1	1	2	1	1	1	2	1	35	2	2	1	0	9	0	0	0	365	1	0
759	49	1	89	172	30.0838	1	2	0	1	0	0	0.6	0.9	0.3	0	0	1	0	0	0	1	1	14.1	1	1	2	1	1	1	1	0	55	2	1	1	0	10	0	0	0	365	1	0
760	78	1	80	172	27.0416	0	1	0	0	2	0	1.8	2.2	0.4	1	0	1	1	0	0	1	1	11	1	0	1	1	1	4	0		0	1	0	0	1	0	0	0	1	1	3	4
761	67	1	96	178	30.2992	1	0	0	1	2	0	0.8	1	0.2	0	0	0	0	0	0	3	2	14.4	1	1	2	1	1	1	1	0	53	3	0	1	0	37	1	0	1	305	0	0
762	62	1	78	176	25.1808	0	2	0	1	0	0	0.8	1	0.2	0	1	0	1	0	1	2	2	14.2	1	1	2	1	1	2	2	1	30	2	2	2	0	15	0	0	0	365	2	0
763	55	1	81	165	29.7521	0	2	2	0	0	0	0.7	1	0.3	0	0	1	0	0	0	3	2	15	1	1	2	1	1	1	1	0	50	2	2	1	0	9	0	0	0	365	1	0
764	77	0	63	150	28	0	1	0	1	2	0	0.9	1	0.1	0	0	0	0	0	0	4	1	15	1	1	2	2	0	1	1	0	55	2	2	1	0	5	1	0	1	83	0	0
765	55	0	70	163	26.3465	0	0	0	1	0	0	0.69	0.9	0.21	0	0	0	0	0	1	1	1	13.2	1	1	2	2	0	1	1	0	60	1	0	1	0	8	0	0	0	365	0	0
766	77	1	93	170	32.1799	1	1	0	0	2	0	1	1.4	0.4	1	0	1	0	0	0	1	1	12.9	1	0	1	1	1	1	1	0	60	2	2	1	0	19	0	0	0	365	1	0
767	70	1	101	165	37.0983	1	0	0	1	0	1	1.4	1.9	0.5	0	0	1	0	0	0	4	3	13.2	0	0	2	3	0	1	1	0	55	1	0	0	0	31	0	0	0	365	1	0
768	77	1	105	166	38.1042	1	1	2	1	2	0	0.8	1.1	0.3	0	0	1	0	1	0	1	1	14.6	1	1	2	2	0	1	1	0	0	3	0	0	0	4	0	0	0	365	1	0
769	49	0	84	167	30.1194	1	2	0	0	0	0	0.8	0.9	0.1	0	0	0	0	0	0	1	1	12.6	1	1	2	1	1	1	1	0	60	2	1	1	0	6	0	0	0	365	0	0
770	89	0	60	160	23.4375	0	0	0	1	0	0	0.9	1.5	0.6	1	0	1	1	0	1	1	1	11.1	1	0	2	1	1	3	1	0	45	1	0	2	0	13	1	0	1	29	3	4
771	74	1					2	2	1	2	1	1.7	3.1	1.4	0	1	1	0	0	0	2	3	12.5	0	0	2	3	0	1	1	0	71	1	0	0	0	30	0	0	0	365	1	0
772	56	1	79	167	28.3266	0	2	0	1	2	0	0.8	0.9	0.1	0	0	0	0	0	0	1	1	14.6	1	0	1	1	1	1	1	0	55	3	0	1	0	53	0	0	0	365	0	0
773	78	1	76	166	27.5802	0	1	0	1	0	0	1	1.4	0.4	0	0	1	0	0	1	1	1	14	0	1	2	3	0	1	1	0	55	1	0	1	0	11	0	94	1	94	1	0
774	67	1	84	172	28.3937	0	1	0	0	0	0	1	1	0	0	0	0	0	0	0	1	1	14	0	0	2	3	0	1	1	0	74	2	2	1	0	7	0	0	0	365	0	0
775	68	0	75	152	32.4619	1	0	0	1	2	0	0.96	1	0.04	0	0	0	0	0	1	1	1	14	0	1	2	3	0	1	1	0	71	3	0	1	0	27	0	0	0	365	0	0
776	53	0	70	158	28.0404	0	2	0	0	0	0	0.56	0.56	0	0	0	0	0	0	0	1	1	14	0	0	2	3	0	1	1	0	65	1	0	1	0	3	0	0	0	365	0	0
777	64	1	82	165	30.1194	1	2	0	1	2	1	1.6	1.9	0.3	0	0	0	0	0	0	3	2	13.5	1	1	2	1	1	1	2	1	40	3	0	1	0	37	0	0	0	365	0	0
778	61	1	63	168	22.3214	0	2	0	1	2	1	4.3	6.8	2.5	0	1	1	0	0	0	2	1	13	0	1	2	3	0	1	1	0	61	1	0	0	0	14	0	0	0	365	1	0
779	76	1	60	170	20.7612	0	2	0	0	0	0	0.7	1	0.3	0	0	1	0	0	0	1	1	16	1	0	2	1	1	1	1	0	65	2	2	1	0	7	0	0	0	365	1	0
780	69	1	74	165	27.1809	0	2	0	1	2	0	0.74	0.74	0	0	0	0	0	0	0	1	1	16.6	0	1	2	3	0	1	1	0	60	2	2	1	0	6	0	0	0	365	0	0
781	70	1	88	168	31.1791	1	1	0	1	2	0	1.3	1.6	0.3	0	0	1	0	0	0	1	1	13	1	1	2	1	1	1	1	0	69	2	0	2	0	7	0	42	1	42	1	0
782	53	1	88	177	28.089	0	2	2	1	0	0	0.78	0.9	0.12	0	0	0	0	0	0	1	1	17	1	0	2	2	0	1	1	0	60	2	1	1	0	6	0	0	0	365	0	0
783	59	0	71	171	24.281	0	2	0	0	0	0	0.9	1	0.1	0	0	0	0	0	0	1	1	14.8	1	0	2	2	0	1	1	0	65	1	0	0	0	7	0	0	0	365	0	0
784	77	1	93	160	36.3281	1	2	0	1	2	0	0.97	1.6	0.63	0	0	1	0	1	0	2	1	13.9	0	1	2	3	0	1	1	0	60	2	1	2	0	34	1	0	0	365	1	0
785	52	1	100	183	29.8606	0	2	0	1	0	0	0.9	1.3	0.4	0	0	1	0	0	0	1	1	13.5	1	0	2	2	0	1	1	0	60	2	1	2	0	8	0	0	0	365	1	0
786	55	1	103	180	31.7901	1	1	0	1	0	0	0.8	1	0.2	0	0	0	0	0	0	2	1	14.7	0	1	2	3	0	2	1	0	65	3	0	0	0	9	0	0	0	365	0	0
787	45	1	79	175	25.7959	0	2	0	0	0	0	0.7	0.9	0.2	0	0	0	0	0	0	1	1	15	1	0	2	2	0	1	1	0	65	2	2	1	0	5	0	0	0	365	0	0
788	47	1	92	183	27.4717	0	2	0	1	0	0	1.1	1.5	0.4	0	0	1	0	0	0	2	5	15	1	0	2	1	1	1	2	1	35	2	1	1	0	9	0	0	0	365	1	0
789	63	0	63	168	22.3214	0	0	0	0	2	0	0.6	1	0.4	0	0	1	0	0	0	1	1	12.7	1	0	2	1	1	1	2	1	35	2	2	1	0	10	0	0	0	365	1	0
790	46	0	56	161	21.6041	0	2	0	0	1	0	0.7	1.2	0.5	1	1	1	0	0	0	2	2	7.5	0	0	2	3	0	1	1	0	0	2	2	1	0	21	0	108	1	108	1	0
791	65	0	71	173	23.7228	0	0	0	1	2	0	0.8	1	0.2	1	0	0	0	0	1	1	1	10.3	1	1	2	2	0	1	1	0	50	2	2	1	0	10	0	56	1	56	0	0
792	83	0					0	0	1	2	1	1.2	1.5	0.3	1	0	1	1	0	0	1	1	8.6	1	0	1	2	0	2	1	0	45	1	0	0	0	15	1	0	1	131	3	3
793	65	1	63	168	22.3214	0	2	2	0	0	0	0.8	1	0.2	0	0	0	0	0	0	1	1	16	1	0	2	1	1	1	2	1	35	2	2	1	0	9	0	0	0	365	0	0
794	71	0	75	165	27.5482	0	0	0	0	0	0	0.58	0.9	0.32	0	0	1	0	0	0	1	1	13.4	1	0	2	1	1	1	1	0	60	1	0	0	0	13	0	136	1	136	1	0
795	75	0	65	155	27.0552	0	0	0	1	0	0	0.8	1.1	0.3	0	0	1	0	0	1	1	1	13.7	1	1	2	1	1	1	2	1	30	2	1	2	0	10	1	0	0	365	1	0
796	62	0	86	162	32.7694	1	1	0	1	0	0	0.7	0.8	0.1	0	0	0	0	0	0	3	1	13	1	0	2	1	1	1	1	0	67	3	0	1	0	33	0	0	1	365	0	0
797	85	0					0	0	1	2	0	1	1.1	0.1	0	0	0	0	0	0	1	1	13.3	1	0	2	2	0	1	1	0	65	1	0	2	0	8	0	0	0	365	0	0
798	45	0	76	163	28.6048	0	2	0	1	0	0	0.7	1	0.3	0	0	1	0	0	0	1	1	15.3	1	0	2	1	1	1	2	1	35	2	2	1	0	7	0	0	0	365	1	0
799	64	1	88	168	31.1791	1	0	0	1	2	0	0.7	0.8	0.1	0	0	0	0	0	0	2	1	15	1	0	2	1	1	1	1	0	61	2	2	1	0	7	0	0	0	365	0	0
800	74	0	73	158	29.2421	0	0	0	1	0	0	0.7	1	0.3	0	0	1	0	0	0	1	1	13.2	1	1	2	2	0	1	1	0	70	1	0	1	0	5	0	0	0	365	1	0
801	56	1	86	172	29.0698	0	0	0	1	2	1	3.55	4.31	0.76	1	0	1	0	0	0	4	2	11.5	1	0	1	2	0	1	1	0	67	1	0	0	0	14	0	0	0	365	1	0
802	81	0	147	61	395.055	1	0	0	1	0	0	0.9	1.7	0.8	0	0	1	1	0	0	5	0	12.7	1	1	1	2	0	3	1	0	45	2	0	1	0	22	0	0	0	166	3	4
803	70	1	96	182	28.982	0	0	0	1	2	0	0.9	1.1	0.2	0	0	0	0	0	0	4	2	14.3	1	1	2	1	1	1	2	1	35	2	2	1	0	9	0	0	0	365	0	0
804	74	0	85	160	33.2031	1	0	0	1	2	0	0.84	1.3	0.46	1	0	1	0	0	0	2	2	12.4	1	0	1	1	1	1	0		0	1	0	0	0	13	0	0	0	365	1	0
805	58	0					0	0	1	2	1	0.3	0.6	0.3	0	0	1	0	0	0	1	1	14.6	1	0	2	1	1	1	1	0	50	1	0	0	0	84	0	0	0	365	1	0
806	81	1					1	0	1	0	0	0.97	1.4	0.43	1	0	1	0	0	0	1	1	11.6	1	0	2	1	1	1	1	0	45	1	0	0	0	7	0	0	0	365	1	0
807	50	1	93	169	32.5619	1	2	0	1	0	0	0.7	1.7	1	1	0	1	0	0	0	1	1	12.7	1	0	2	1	1	1	2	1	30	2	2	1	0	23	0	311	1	311	1	0
808	64	1	64	157	25.9645	0	0	0	1	0	0	0.9	1.6	0.7	0	0	1	1	0	0	1	1	15.9	1	1	2	1	1	3	2	1	40	1	0	2	1	2	0	0	1	2	3	4
809	73	0	77	156	31.6404	1	0	0	1	2	0	0.7	2	1.3	0	0	1	0	0	0	1	1	12.7	1	0	2	2	0	1	1	0	0	1	0	1	0	6	0	0	0	365	1	0
810	78	0					0	0	1	0	0	0.5	0.6	0.1	0	0	0	0	0	0	1	1	12.2	0	1	2	3	0	1	1	0	65	1	0	0	0	6	0	0	0	356	0	0
811	74	1	60	170	20.7612	0	2	0	1	2	1	0.9	1.6	0.7	1	0	1	1	0	0	1	1	9.7	1	0	1	2	0	3	1	0	70	0	0	0	1	9	0	0	1	9	3	4
812	51	1	67	177	21.3859	0	2	0	0	0	0	0.57	0.7	0.13	1	0	0	0	0	0	2	2	11.7	1	0	2	1	1	1	2	1	30	2	2	1	0	6	0	0	0	365	0	0
813	63	1	85	168	30.1162	1	1	0	1	2	0	0.6	0.9	0.3	0	0	1	0	0	0	2	3	14.8	1	1	2	2	0	2	1	0	45	1	0	2	0	15	0	0	0	365	1	0
814	58	1	68	173	22.7204	0	2	0	1	0	0	0.7	0.9	0.2	0	0	0	0	0	0	1	1	14.3	1	1	2	1	1	1	1	0	45	2	2	1	0	13	0	0	0	365	0	0
815	46	0	95	170	32.872	1	0	0	0	0	0	0.62	0.8	0.18	1	0	0	0	0	0	1	1	11.4	1	0	2	2	0	1	1	0	65	1	0	1	0	6	0	0	0	365	0	0
816	55	1	92	174	30.3871	1	2	1	1	2	0	0.65	1	0.35	0	0	1	0	0	0	4	3	0	0	0	2	3	0	1	1	0	0	0	0	0	0	5	0	0	0	365	1	0
817	62	1	97	166	35.201	1	0	0	1	2	0	0.9	1.1	0.2	1	0	0	0	0	0	1	1	11.4	1	1	2	1	1	1	1	0	50	2	0	1	0	3	0	0	0	365	0	0
818	39	1	80	173	26.7299	0	2	0	1	2	0	0.6	0.7	0.1	0	0	0	0	0	0	1	1	14	1	1	2	1	1	1	1	0	50	2	2	1	0	7	0	0	0	365	0	0
819	35	0	84	172	28.3937	0	2	0	0	0	0	0.8	1	0.2	0	1	0	0	0	0	1	1	13.4	1	1	2	2	0	1	1	0	66	1	0	1	0	8	0	0	0	365	0	0
820	86	0	74	150	32.8889	1	0	0	1	0	0	1.2	1.7	0.5	0	0	1	0	0	0	1	1	12.5	0	1	2	3	0	2	1	0	45	2	1	1	0	8	0	0	0	365	1	0
821	73	1	96	172	32.45	1	0	0	1	0	0	0.8	0.99	0.19	0	1	0	0	0	0	4	2	15	0	1	2	3	0	1	1	0	65	1	0	2	0	3	0	0	0	365	0	0
822	77	0	91	158	36.4525	1	0	0	1	0	0	1.07	1.7	0.63	0	0	1	0	0	0	1	1	15	1	1	2	2	0	1	1	0	60	2	2	1	0	5	0	0	0	365	1	0
823	60	1	81	172	27.3797	0	2	0	1	0	0	0.94	1.2	0.26	0	0	0	0	0	0	1	1	13.5	0	1	2	3	0	1	1	0	60	3	0	1	0	4	0	0	0	365	0	0
824	73	0	75	168	26.5731	0	0	0	1	0	0	0.75	0.9	0.15	0	0	0	0	0	1	1	1	14.9	0	1	2	3	0	1	1	0	74	2	2	1	0	36	0	0	0	365	0	0
825	75	1	53	164	19.7055	0	2	0	1	0	0	0.8	1.3	0.5	1	1	1	0	1	0	1	1	9.9	1	0	2	2	0	1	1	0	0	1	0	2	1	37	0	0	1	37	1	0
826	77	1	85	162	32.3884	1	0	0	1	0	0	0.7	1	0.3	0	0	1	0	1	0	1	1	14.6	1	0	2	2	0	1	1	0	65	2	1	1	0	12	0	0	0	365	1	0
827	78	1	78	166	28.306	0	1	0	1	0	0	0.8	1.1	0.3	0	1	1	0	0	0	3	1	16	1	1	2	1	1	1	1	0	55	2	1	1	0	11	0	0	0	365	1	0
828	72	1					2	0	1	0	0	0.7	1.1	0.4	0	1	1	0		0	1	1	14.3	1	0	1	1	1	1	1	0	55	1	0	0	0	10	0	0	0	365	1	0
829	69	1					1	0	0	0	0	0.6	1.3	0.7	0	0	1	0	1	0	1	1	13.6	1	0	1	2	0	1	1	0	60	1	0	2	0	96	1	0	1	95	1	0
830	65	1	100	170	34.6021	1	1	2	1	2	0	1.1	1.5	0.4	0	0	1	1	0	0	1	1	15.3	1	0	2	1	1	4	2	1	40	3	1	0	0	7	1	0	1	204	3	3
831	65	1	76	173	25.3934	0	1	0	1	2	0	0.7	0.9	0.2	0	0	0	0	0	0	1	1	13.4	0	0	2	3	0	1	1	0	66	1	0	2	0	6	0	0	0	365	0	0
832	44	1	80	170	27.6817	0	2	0	1	2	1	1.48	1.7	0.22	0	1	0	0	0	0	3	1	17	0	1	2	3	0	1	1	0	65	1	0	2	0	8	0	0	0	365	0	0
833	60	1	92	175	30.0408	1	1	0	1	2	1	1.5	2	0.5	0	0	1	0	0	0	2	3	16.1	0	1	1	3	0	1	2	1	40	2	2	2	0	13	1	0	1	159	1	0
834	71	1	74	173	24.7252	0	1	0	1	2	0	1.1	1.3	0.2	0	0	0	0	0	0	2	1	15	0	1	2	3	0	1	1	0	60	3	0	1	0	20	0	105	1	105	0	0
835	49	1	100	170	34.6021	1	2	0	0	0	0	0.9	1.3	0.4	0	0	1	0	0	0	1	1	16.2	1	0	2	1	1	1	1	0	50	2	2	1	0	9	0	0	0	365	1	0
836	59	1	78	180	24.0741	0	2	0	0	0	0	0.72	0.9	0.18	0	0	0	0	0	0	1	1	14.1	1	1	2	2	0	1	2	1	35	2	2	1	0	9	1	0	0	365	0	0
837	74	0	77	153	32.8933	1	0	0	1	2	0	1.18	1.5	0.32	1	0	1	0	0	0	1	1	9.2	0	1	2	3	0	1	1	0	0	3	0	1	0	18	0	0	0	365	1	0
838	53	1	79	169	27.6601	0	2	2	0	0	1	1.6	2.8	1.2	0	0	1	1	0	0	1	1	15.8	1	0	2	1	1	3	2	1	35	2	2	1	0	47	0	0	0	365	3	4
839	53	1	97	172	32.788	1	1	0	1	0	0	0.8	1.1	0.3	0	0	1	0	0	0	1	1	14	0	1	2	3	0	1	1	0	0	2	2	2	0	3	0	211	1	211	1	0
840	84	1					2	0	1	2	0	1	1.7	0.7	1	0	1	1	1	0	1	1	11	1	0	2	1	1	3	2	1	35	1	0	0	0	39	1	0	1	154	3	4
841	58	0	89	168	31.5334	1	0	0	1	2	1	2.2	2.7	0.5	1	0	1	0	0	0	4	2	10.7	0	1	1	3	0	1	1	0	68	2	2	1	0	14	0	0	0	365	1	0
842	67	0	71	157	28.8044	0	0	0	1	2	0	0.9	1.2	0.3	0	0	0	0	0	0	2	3	13.2	0	1	2	3	0	1	1	0	45	1	0	2	0	11	0	0	0	365	0	0
843	78	1	90	176	29.0548	0	0	0	1	0	0	0.93	1.2	0.27	1	0	0	0	0	1	1	1	12.1	1	0	2	2	0	1	1	0	67	2	1	1	0	7	0	0	0	365	0	0
844	53	1	85	175	27.7551	0	1	0	0	0	0	0.86	1	0.14	0	0	0	0	0	0	4	2	14	0	1	2	3	0	1	1	0	65	2	2	1	0	7	0	0	0	365	0	0
845	75	1	73	170	25.2595	0	1	0	1	0	0	1.2	1.6	0.4	0	1	1	0	0	1	4	3	14	1	1	1	2	0	1	0		0	2	0	2	1	4	0	0	1	4	1	0
846	72	1					0	0	1	2	1	1.4	3.2	1.8	1	1	1	1	0	0	1	1	10.6	1	1	2	2	0	4	2	1	30	2	0	2	1	20	0	0	1	20	3	4
847	71	0	66	148	30.1315	1	0	0	1	0	0	0.7	0.9	0.2	0	0	0	0	0	0	1	1	13.5	0	1	2	3	0	1	1	0	60	3	0	0	0	18	0	0	0	365	0	0
848	55	1	105	178	33.1398	1	0	2	1	2	1	1.1	1.4	0.3	0	1	0	1	0	0	1	1	16.9	0	0	2	2	0	3	1	0	0	3	0	0	0	11	0	0	0	356	2	0
849	52	1	80	161	30.863	1	2	0	1	2	0	0.7	1	0.3	0	0	1	1	0	0	2	2	14	1	0	2	2	0	4	2	1	35	2	2	2	0	12	0	0	0	365	3	3
850	40	0	99	166	35.9268	1	2	0	1	0	0	0.53	0.9	0.37	1	0	1	0	0	0	1	1	11.8	1	0	2	1	1	1	2	1	35	2	2	1	0	20	0	0	0	365	1	0
851	78	1	69	149	31.0797	1	1	0	1	0	0	1	1.5	0.5	1	1	1	1	1	0	1	1	12.5	1	1	1	2	0	3	2	1	35	2	2	1	0	6	1	0	0	365	3	4
852	76	1	66	166	23.9512	0	0	0	1	2	0	1.15	1.5	0.35	1	0	1	0	0	0	2	1	10.5	1	0	2	2	0	1	2	1	35	2	1	2	0	5	0	0	0	365	1	0
853	78	1	77	168	27.2817	0	1	0	1	0	1	2	2.8	0.8	1	1	1	1	0	0	1	1	12.8	1	0	2	2	0	2	1	0	45	2	1	1	1	19	0	0	1	19	3	4
854	68	0	65	150	28.8889	0	2	0	1	2	0	0.48	0.5	0.02	0	1	0	0	0	0	4	2	14	1	0	2	2	0	1	1	0	55	3	0	1	0	38	1	0	0	365	0	0
855	61	0	74	163	27.852	0	2	0	1	2	0	0.58	0.8	0.22	1	0	0	0	0	0	1	1	11.8	0	1	2	3	0	1	1	0	72	3	0	1	0	12	0	0	0	365	0	0
856	57	1	85	168	30.1162	1	2	2	1	0	0	0.7	1	0.3	0	0	1	0	0	0	1	1	14	1	1	2	1	1	1	1	0	55	2	2	1	0	17	0	0	0	365	1	0
857	71	1	80	168	28.3447	0	1	0	1	0	0	0.7	0.91	0.21	1	1	0	0	0	0	1	1	10.5	1	1	1	1	1	1	1	0	65	2	2	1	0	17	0	1	1	1	0	0
858	74	1	98	175	32	1	0	0	1	2	0	1	1.5	0.5	1	0	1	0	0	0	3	3	9.5	1	0	2	2	0	1	2	1	40	2	2	2	0	10	0	0	0	365	1	0
859	77	0	56	155	23.3091	0	0	0	0	2	0	1.1	1.45	0.35	1	0	1	1	0	0	1	1	10.3	1	0	2	2	0	2	1	0	55	2	1	2	0	7	0	0	0	365	3	3
860	57	1	114	182	34.4161	1	1	0	1	2	0	0.8	0.93	0.13	0	0	0	0	0	0	1	1	16.1	0	0	2	3	0	1	1	0	60	3	0	1	0	15	0	0	0	231	0	0
861	66	1	105	161	40.5077	1	2	0	1	2	1	1.3	1.4	0.1	0	0	0	0	0	0	2	1	16.1	0	1	2	3	0	1	1	0	45	2	2	2	0	5	0	0	0	365	0	0
862	66	0	70	155	29.1363	0	0	0	1	2	0	0.8	1.1	0.3	0	0	1	1	0	0	3	3	13.2	1	0	1	2	0	2	1	0	50	3	0	0	0	11	0	0	0	365	3	3
863	85	0					0	0	1	2	0	0.9	1.1	0.2	0	0	0	0	0	1	1	1	0	1	0	2	2	0	1	1	0	60	0	0	0	0	4	0	0	0	365	0	0
864	54	1	102	171	34.8825	1	2	0	1	2	0	0.55	0.6	0.05	0	0	0	0	0	0	1	1	15	1	1	2	2	0	1	1	0	0	2	2	1	0	7	0	0	0	365	0	0
865	47	1	86	176	27.7634	0	2	0	1	0	0	0.9	1.3	0.4	0	0	1	1	0	0	1	1	14.9	1	1	2	1	1	3	2	1	35	2	2	1	0	10	0	0	0	365	3	3
866	85	1	86	164	31.975	1	0	0	1	0	0	0.8	1.1	0.3	0	0	1	0	0	0	3	2	16	0	1	2			1	0		0	2	2	1	0	1	0	0	0	365	1	0
867	63	1	100	173	33.4124	1	2	0	1	0	0	0.9	1.2	0.3	0	0	0	0	0	0	3	2	16	1	0	2	1	1	1	1	0	60	2	2	1	0	10	0	0	0	365	0	0
868	49	1	70	183	20.9024	0	2	0	0	0	0	0.6	0.8	0.2	0	0	0	0	0	0	1	1	14.8	1	0	2	2	0	1	1	0	65	1	0	1	0	8	0	0	0	365	0	0
869	71	0	65	160	25.3906	0	0	0	1	2	1	1	1.5	0.5	0	0	1	1	0	0	1	1	12.8	1	1	1	2	0	3	1	0	65	1	0	0	0	14	0	0	0	365	3	4
870	46	1	78	170	26.9896	0	1	0	1	1	1	5.3	9.9	4.6	0	1	1	0	0	0	1	1	13.8	1	1	1	2	0	1	1	0	45	2	2	2	0	35	0	0	0	365	1	0
871	58	1	88	168	31.1791	1	2	0	1	2	0	0.9	1.3	0.4	0	0	1	0	0	0	2	2	14.5	1	1	2	2	0	1	1	0	55	2	2	2	0	8	0	0	0	365	1	0
872	63	0	63	148	28.7619	0	0	0	0	2	0	0.6	0.8	0.2	0	0	0	0	0	0	1	1	12.8	1	1	2	1	1	1	1	0	0	2	1	1	0	8	0	0	0	365	0	0
873	71	1	70	166	25.4028	0	1	0	0	0	0	0.7	0.91	0.21	1	0	0	0	0	0	1	1	12.3	1	0	2	1	1	1	2	1	35	2	2	1	0	14	0	0	0	365	0	0
874	54	1	78	173	26.0617	0	2	0	0	0	0	0.76	0.8	0.04	0	0	0	0	0	0	1	1	14.4	0	0	2	3	0	1	1	0	66	3	0	1	0	5	0	0	0	365	0	0
875	65	1					0	0	1	0	1	1.2	1.5	0.3	1	0	1	0	0	0	2	0	12.9	1	0	1	1	1	1	1	0	45	2	2	1	0	4	0	0	0	365	1	0
876	81	1	80	160	31.25	1	1	0	1	0	0	0.9	1.4	0.5	1	0	1	0	0	0	1	1	11.5	1	0	2	1	1	1	1	0	45	2	1	1	0	8	0	0	0	365	1	0
877	85	0					0	0	1	0	0	1.4	3.7	2.3	0	0	1	1	0	0	1	1	14	1	0	2	1	1	4	2	1	35	1	0	2	1	2	0	0	1	2	3	4
878	69	1	92	168	32.5964	1	1	0	1	0	0	0.64	1	0.36	0	0	1	0	0	0	1	1	13	0	0	2	3	0	1	1	0	65	3	0	1	0	12	0	0	0	365	1	0
879	69	1	90	175	29.3878	0	2	2	0	0	0	0.83	0.9	0.07	0	0	0	0	0	0	1	1	14	0	0	2	3	0	1	1	0	66	2	2	1	0	4	0	0	0	365	0	0
880	58	0	89	158	35.6513	1	0	0	1	1	0	0.7	0.8	0.1	0	0	0	0	0	0	1	1	13	1	1	2	2	0	1	1	0	70	2	2	1	0	5	0	0	0	365	0	0
881	46	1	92	176	29.7004	0	0	0	1	2	0	0.8	1.2	0.4	0	0	1	0	0	0	1	1	15.2	1	0	2	1	1	1	1	0	58	2	1	1	0	9	0	90	1	90	1	0
882	85	0					0	0	1	2	0	0.86	1	0.14	1	0	0	0	0	0	1	1	11.4	0	0	2	3	0	1	1	0	65	1	0	0	0	5	0	0	0	365	0	0
883	64	1	100	172	33.8021	1	1	1	1	2	0	1.2	3	1.8	0	0	1	0	0	0	1	1	13.2	1	1	2	1	1	1	1	0	0	2	2	1	0	17	0	0	0	365	1	0
884	65	1	90	172	30.4218	1	1	0	1	0	0	0.9	1.1	0.2	1	0	0	0	0	0	1	1	11.9	1	0	2	1	1	1	2	1	35	2	1	1	0	10	0	0	0	365	0	0
885	83	1	102	163	38.3906	1	0	0	1	0	0	1	1.4	0.4	0	0	1	0	0	0	1	1	15	0	0	2	3	0	1	1	0	63	2	1	1	0	10	0	106	1	106	1	0
886	71	1	80	168	28.3447	0	0	0	1	0	0	0.9	1.1	0.2	0	0	0	1	0	0	2	3	15	0	1	2	3	0	2	2	1	40	2	1	2	0	4	1	0	1	235	2	0
887	69	1	91	167	32.6294	1	1	0	1	0	0	0.87	1.1	0.23	0	0	0	0	0	0	1	1	15.4	0	0	2	3	0	1	1	0	0	3	0	0	0	7	0	0	0	365	0	0
888	44	1	89	178	28.0899	0	1	0	1	2	0	0.62	0.9	0.28	0	0	0	0	0	0	4	2	14.8	0	0	2	3	0	1	1	0	0	1	0	2	0	5	0	0	0	365	0	0
889	68	1	71	168	25.1559	0	1	0	1	2	0	0.6	1.1	0.5	0	0	1	1	0	0	1	1	14.2	0	0	2	3	0	2	1	0	50	1	0	1	0	7	0	279	1	279	3	4
890	70	1	99	174	32.6992	1	2	0	1	0	0	1.2	1.2	0	0	0	0	0	0	0	4	2	15	0	1	2	3	0	1	1	0	50	2	0	0	0	2	0	96	1	96	0	0
891	78	0	58	156	23.833	0	0	0	1	0	0	0.89	1	0.11	0	0	0	0	0	0	4	4	15	0	1	2	3	0	1	3	1	20	1	0	0	0	8	1	0	0	365	0	0
892	51	1	70	173	23.3887	0	2	0	0	0	0	0.73	0.9	0.17	0	0	0	0	0	0	1	1	15.1	1		2	1	1	1	1	0	60	2	1	1	0	7	0	0	0	365	0	0
893	77	0	83	156	34.1059	1	0	0	1	2	1	1.08	1.8	0.72	1	0	1	0	0	1	4	2	11.1	1	1	2	2	0	1	2	1	35	1	0	2	0	25	1	0	1	52	1	0
894	56	1	88	170	30.4498	1	2	2	0	0	0	0.8	1.3	0.5	0	0	1	0	0	0	1	1	15.1	1	1	2	1	1	1	1	0	55	2	1	2	0	12	0	0	0	365	1	0
895	59	1	71	160	27.7344	0	1	0	1	2	1	1.57	4	2.43	1	1	1	0	0	0	1	1	10.5	0	1	2	3	0	1	1	0	65	2	2	1	0	17	0	154	1	154	1	0
896	82	1	87	165	31.9559	1	1	0	0	0	0	1	1.3	0.3	0	0	1	0	0	0	1	1	13.4	1	0	2	1	1	1	2	1	40	3	0	0	0	29	0	0	0	365	1	0
897	81	0	58	150	25.7778	0	0	0	1	0	0	0.8	1.1	0.3	1	0	1	1	0	0	1	1	9.7	1	1	2	1	1	1	1	0	45	2	1	1	0	7	0	0	0	365	3	1
898	60	1	75	175	24.4898	0	0	0	0	0	0	1	1.4	0.4	0	0	1	0	0	0	1	1	15.2	1	1	2	1	1	1	1	0	0	1	0	2	0	6	0	0	0	365	1	0
899	43	1	110	165	40.404	1	2	0	1	0	0	0.5	0.9	0.4	0	0	1	0	0	0	1	1	15.6	1	1	1	2	0	1	1	0	65	2	2	1	0	10	0	0	0	365	1	0
900	65	0	101	168	35.7851	1	0	0	1	2	0	0.8	1	0.2	0	0	0	0	0	0	4	3	13.1	1	1	2	2	0	1	1	0	74	2	2	2	0	2	0	98	1	98	0	0
901	73	0	85	158	34.049	1	0	0	1	0	0	0.9	1.1	0.2	1	0	0	0	0	0	1	1	11	0	1	2	3	0	1	1	0	60	2	2	1	0	2	0	0	0	365	0	0
902	56	1	61	156	25.0657	0	2	0	0	0	0	0.9	0.9	0	0	0	0	0	0	0	1	1	14.4	0	0	2	3	0	1	1	0	68	3	0	1	0	21	0	0	0	365	0	0
903	67	1					0	0	0	0	0	0.9	1.1	0.2	1	0	0	0	0	0	1	1	11.9	1	1	2	1	1	1	1	0	61	1	0	2	0	19	0	0	0	365	0	0
904	51	1	75	170	25.9516	0	2	2	0	0	0	0.073	0.5	0.427	0	0	1	0	0	0	1	1	15.3	1	0	2	1	1	1	2	1	35	2	2	1	0	6	0	0	0	365	1	0
905	58	1					0	2	1	0	0	1.6	2.8	1.2	0	0	1	0	0	0	1	1	15.9	0	0	2	3	0	0	0		0	1	0	0	1	4	0	0	1	4	1	0
906	76	0					0	0	1	0	0	0.7	0.8	0.1	0	0	0	0	0	0	1	1	13.4	1	1	2	1	1	1	1	0	0	1	0	0	0	17	0	0	0	365	0	0
907	57	1	94	170	32.526	1	1	0	1	2	1	1.2	1.4	0.2	1	0	0	0	0	0	5	2	12	1	1	2	1	1	1	1	0	65	2	2	1	0	11	0	0	0	365	0	0
908	59	1	77	170	26.6436	0	1	1	1	2	0	0.74	1	0.26	0	1	0	1	0	1	4	2	14.6	1	1	2	2	0	2	1	0	45	3	0	1	0	10	0	0	0	365	2	0
909	83	0					0	0	1	2	1	2.5	5.3	2.8	1	0	1	1	0	0	1	1	10.1	1	1	2	2	0	2	2	1	35	1	0	0	1	6	0	0	1	6	3	4
910	43	1					2	2	0	0	0	0.5	1.1	0.6	1	0	1	1	0	0	1	1	11.6	1	0	2	1	1	1	1	0	50	1	0	0	1	10	0	0	1	10	3	2
911	50	1	86	178	27.143	0	2	0	1	2	0	0.7	0.9	0.2	0	0	0	0	0	0	1	1	15	0	1	2	3	0	1	1	0	60	2	1	1	0	7	0	0	0	365	0	0
912	73	1	74	172	25.0135	0	0	0	1	0	0	0.7	1	0.3	0	0	1	0	0	0	1	1	14.2	0	0	2	3	0	1	1	0	60	2	2	1	0	11	0	0	0	365	1	0
913	46	1	104	169	36.4133	1	2	0	0	0	0	0.3	0.69	0.39	0	0	1	0	0	0	1	1	15.3		0	2	2	0	1	1	0	0	1	0	0	0	5	1	0	0	365	1	0
914	71	1	76	167	27.2509	0	2	0	0	0	1	1.2	1.6	0.4	0	0	1	1	0	1	2	2	14.8	1	1	2	2	0	3	1	0	45	2	2	2	0	14	0	1	1	1	3	4
915	72	1	78	180	24.0741	0	0	0	1	2	1	1.4	1.9	0.5	0	0	1	0	0	1	1	1	14	1	1	2	2	0	1	1	0	60	2	1	1	0	19	0	156	1	156	1	0
916	76	1	83	164	30.8596	1	1	0	1	0	0	0.8	1.3	0.5	0	0	1	0	0	0	1	1	13.5	1	0	2	1	1	1	1	0	50	2	2	1	0	11	0	0	0	365	1	0
917	65	0	70	158	28.0404	0	0	0	0	2	0	0.5	0.6	0.1	0	0	0	0	0	0	1	1	14.3	1	1	1	2	0	1	1	0	60	2	2	1	0	8	0	0	0	365	0	0
918	58	1	70	175	22.8571	0	2	2	1	0	0	0.8	0.98	0.18	0	0	0	0	0	0	2	2	16.3	1	1	2	1	1	1	2	1	35	2	2	1	0	7	0	0	0	365	0	0
919	70	0	60	150	26.6667	0	0	0	1	2	0	0.67	1	0.33	1	0	1	0	0	0	5	1	11.8	1	1	2	1	1	1	2	1	35	2	2	1	0	13	0	0	0	365	1	0
920	72	1	90	158	36.0519	1	1	0	1	2	1	1.17	1.47	0.3	0	0	1	0	1	0	4	2	13.5	0	1	2	3	0	1	1	0	60	3	0	1	0	11	0	0	0	365	1	0
921	72	1	75	165	27.5482	0	1	0	1	2	0	0.8	0.9	0.1	1	0	0	0	0	0	1	1	10.5	0	1	1	3	0	1	1	0	64	1	0	2	0	27	1	0	1	64	0	0
922	47	1	70	170	24.2215	0	2	1	0	0	0	0.7	0.8	0.1	0	0	0	0	0	0	1	1	15	1	0	2	1	1	1	1	0	60	2	2	1	0	7	0	0	0	365	0	0
923	73	1	83	165	30.4867	1	0	0	1	0	0	0.9	1.3	0.4	0	0	1	0	0	1	1	1	18	1	0	1	2	0	1	1	0	60	3	0	1	0	30	1	0	0	365	1	0
924	73	1					1	2	1	2	0	0.9	1.3	0.4	0	0	1	0	0	0	1	1	16.2	1	0	2	1	1	1	1	0	60	1	0	0	0	9	0	0	0	365	1	0
925	80	1	97	161	37.4214	1	1	0	1	2	1	0.8	1	0.2	0	0	0	0	1	0	3	2	14.6	0	1	2	3	0	1	1	0	0	2	2	1	0	16	1	0	0	365	0	0
926	73	1	51	177	16.2788	0	2	2	1	0	0	0.6	0.9	0.3	0	0	1	0	0	0	2	2	13.9	1	1	2	1	1	1	3	1	30	2	0	2	0	15	1	14	1	14	1	0
927	74	0	72	157	29.2101	0	0	0	1	2	0	0.7	0.8	0.1	1	0	0	0	0	0	1	1	11.4	0	1	2	3	0	1	0		0	3	0	1	0	27	0	20	1	20	0	0
928	51	0	69	156	28.3531	0	2	0	0	0	0	0.6	0.7	0.1	0	0	0	0	0	0	1	1	16.5	1	1	2	1	1	1	2	1	35	2	2	1	0	8	0	0	0	365	0	0
929	71	1	89	170	30.7958	1	0	0	1	0	0	1.07	1.3	0.23	0	0	0	0	0	0	4	2	16	0	1	2	3	0	1	1	0	65	2	1	2	0	4	0	163	1	163	0	0
930	52	1	74	170	25.6055	0	2	2	1	2	0	0.8	0.9	0.1	0	0	0	0	0	0	1	1	15.7	1	1	1	1	1	1	1	0	45	3	0	1	0	3	0	0	0	365	0	0
931	70	0	54	160	21.0937	0	0	0	0	2	0	0.61	0.9	0.29	1	0	0	0	0	0	1	1	11	1	0	2	1	1	1	1	0	55	2	2	1	0	9	0	0	0	365	0	0
932	80	1	94	178	29.668	0	2	0	1	2	0	0.9	1.9	1	0	0	1	1	0	1	1	1	13	1	1	1	1	1	2	2	1	35	2	2	1	0	17	0	0	0	365	3	4
933	65	1	64	154	26.986	0	1	2	0	0	1	1	1.4	0.4	0	0	1	1	0	0	1	1	13.8	1	0	1	1	1	4	1	0	45	1	0	0	0	15	1	0	1	365	3	3
934	68	1	78	168	27.6361	0	0	2	0	0	0	1	1.6	0.6	0	0	1	0	0	0	1	1	12.2	1	0	2	2	0	1	1	0	55	2	2	1	0	7	0	2	1	2	1	0
935	63	0	86	146	40.3453	1	0	0	1	0	0	0.7	0.8	0.1	0	0	0	0	0	0	1	1	14	1	1	2	2	0	1	1	0	65	2	2	1	0	8	0	0	0	365	0	0
936	56	1	120	181	36.6289	1	1	0	1	2	1	1	1.3	0.3	0	0	1	0	0	0	4	2	0	0	1	2	3	0	1	0		0	2	1	1	0	1	1	0	0	365	1	0
937	78	1	85	176	27.4406	0	2	0	0	0	0	0.85	1.8	0.95	0	0	1	1	1	0	1	1	15	1	0	2	1	1	4	2	1	30	2	2	0	1	1	0	0	1	1	3	4
938	70	0	76	165	27.9155	0	0	0	1	2	0	0.5	0.7	0.2	0	0	0	0	0	0	4	1	12.1	0	1	2	3	0	1	1	0	0	2	2	1	0	5	0	0	0	365	0	0
939	48	1	90	170	31.1419	1	2	0	1	0	0	1.1	1.5	0.4	0	0	1	0	1	0	1	1	14.7	1	1	2	2	0	1	1	0	60	2	1	1	0	10	0	0	0	365	1	0
940	82	0	80	165	29.3848	0	0	0	1	0	0	0.7	0.9	0.2	1	0	0	0	0	1	1	1	11	1	0	2	1	1	1	2	1	35	2	2	1	0	10	0	134	1	134	0	0
941	70	1	99	164	36.8084	1	1	1	0	2	0	0.93	1.2	0.27	0	0	0	0	0	0	2	4	18	0	0	2	3	0	1	1	0	50	3	0	1	0	14	0	0	0	365	0	0
942	53	1	84	167	30.1194	1	2	2	1	0	0	0.8	1	0.2	0	0	0	0	0	0	1	1	14.8	1	1	1	2	0	1	1	0	45	3	0	1	0	40	0	0	0	365	0	0
943	70	1	65	195	17.094	0	0	0	1	0	0	0.98	1.1	0.12	0	0	0	0	0	0	1	1	15.8	0	1	2	3	0	1	1	0	0	3	0	1	0	11	0	0	0	365	0	0
944	51	1	62	166	22.4996	0	2	0	0	0	0	0.6	0.9	0.3	0	0	1	0	0	0	2	2	15.8	1	0	2	1	1	1	1	0	45	2	2	2	0	7	0	0	0	365	1	0
945	54	1					2	0	0	0	0	0.7	0.8	0.1	0	0	0	0	0	0	1	1	15.5	1	1	2	1	1	1	1	0	60	1	0	2	0	6	0	0	0	365	0	0
946	57	1	117	178	36.9272	1	1	2	1	2	0	0.7	1.2	0.5	0	0	1	0	0	0	1	1	13.9	1	1	2	2	0	1	1	0	45	1	0	0	0	19	0	341	1	341	1	0
947	50	1	75	165	27.5482	0	2	0	1	0	0	0.8	1.2	0.4	0	0	1	0	0	0	1	1	15.8	1	0	2	1	1	1	1	0	65	3	0	0	0	30	0	0	0	365	1	0
948	78	0					0	0	1	0	0	1.3	2.7	1.4	0	0	1	0	0	0	1	1	13.7	1	0	2	1	1	3	3	1	25	1	0	0	1	3	0	0	1	3	1	0
949	79	0	110	160	42.9687	1	0	0	0	0	0	1.12	1.4	0.28	1	0	0	0	0	0	1	1	11.7	1	0	2	2	0	1	1	0	60	1	0	1	0	6	0	0	0	365	0	0
950	79	1	81	177	25.8546	0	1	2	1	0	1	1.1	1.3	0.2	0	0	0	0	0	1	4	3	15.1	0	0	2	3	0	1	1	0	50	2	2	1	0	5	0	0	0	365	0	0
951	55	1	72	178	22.7244	0	2	0	0	0	0	0.8	1	0.2	0	1	0	0	0	0	1	1	15.1	1	1	2	2	0	1	1	0	50	2	1	1	0	2	0	0	0	365	0	0
952	73	1	90	172	30.4218	1	1	0	1	2	0	1.08	1.5	0.42	0	0	1	0	0	0	1	1	13.5	1	1	2	2	0	1	1	0	60	2	1	1	0	6	0	0	0	365	1	0
953	53	1	84	179	26.2164	0	2	0	0	0	0	0.8	1	0.2	0	0	0	0	0	0	4	2	13	1	1	2	2	0	1	1	0	60	1	0	1	0	5	0	0	0	365	0	0
954	65	1	104	173	34.7489	1	2	0	1	0	0	1.09	1.2	0.11	0	0	0	0	0	0	1	1	15	1	1	2	1	1	1	1	0	0	2	2	1	0	7	0	0	0	365	0	0
955	67	1	82	175	26.7755	0	2	0	1	2	0	0.69	0.8	0.11	0	0	0	0	0	0	1	1	14	0	0	2	3	0	1	1	0	65	3	0	0	0	12	0	0	0	365	0	0
956	84	1					1	0	1	2	0	0.74	0.8	0.06	0	0	0	0	1	0	1	1	16.8	1	0	2	2	0	1	1	0	60	1	0	0	0	19	0	0	0	365	0	0
957	51	1	68	168	24.093	0	2	0	0	0	0	0.8	0.9	0.1	0	0	0	0	0	0	1	1	15.6	1	0	2	2	0	1	1	0	0	1	0	0	0	3	0	11	1	11	0	0
958	65	1	85	172	28.7317	0	0	0	1	2	0	1	1.5	0.5	0	0	1	0	0	0	5	2	16.9	1	1	2	1	1	1	2	1	35	3	0	1	0	33	1	0	0	365	1	0
959	62	1	90	187	25.7371	0	1	1	0	0	0	0.8	1	0.2	1	0	0	0	0	0	1	1	11.9	1	0	2	1	1	1	1	0	60	2	2	1	0	9	0	0	0	365	0	0
960	74	1	85	172	28.7317	0	0	0	0	2	0	0.7	0.9	0.2	0	0	0	0	0	1	1	1	14.4	1	1	2	1	1	1	1	0	65	3	0	1	0	6	0	0	0	365	0	0
961	66	1	75	170	25.9516	0	2	0	1	0	0	1	1.3	0.3	0	0	1	0	0	0	5	1	15	0	0	2	3	0	1	1	0	69	2	2	1	0	6	0	0	0	365	1	0
962	80	1	87	175	28.4082	0	2	0	1	2	0	0.9	1.3	0.4	0	0	1	0	1	0	2	3	15	1	0	1	2	0	1	1	0	50	1	0	2	0	8	1	0	1	58	1	0
963	40	0	70	170	24.2215	0	2	0	1	0	0	0.5	0.9	0.4	0	0	1	0	0	0	1	1	13.2	1	1	2	1	1	1	2	1	35	2	2	1	0	11	0	183	1	183	1	0
964	76	1	60	160	23.4375	0	0	0	1	0	0	0.95	1.3	0.35	0	0	1	0	0	0	2	2	16.4	1	1	1	1	1	1	1	0	45	2	2	1	0	17	1	0	0	365	1	0
965	78	0	65	143	31.7864	1	0	0	1	0	0	0.4	0.86	0.46	0	0	1	0	0	0	1	1	15.6	1	1	2	1	1	1	1	0	60	2	2	1	0	18	0	0	0	365	1	0
966	79	0					0	0	1	2	0	0.43	0.5	0.07	0	0	0	0	0	0	4	2	14	0	1	2	3	0	1	0		0	1	0	0	0	4	0	0	0	365	0	0
967	58	1	86	170	29.7578	0	2	0	1	2	0	0.6	0.9	0.3	0	0	1	0	1	0	1	1	13.1	0	0	2	3	0	1	1	0	64	2	0	1	0	7	1	314	1	314	1	0
968	69	1	63	162	24.0055	0	0	0	1	2	0	0.8	0.94	0.14	0	0	0	0	0	0	4	3	14.1	0	0	2	3	0	1	1	0	64	1	0	2	0	9	0	0	0	365	0	0
969	61	0	125	160	48.8281	1	0	0	1	2	0	0.7	1.43	0.73	1	0	1	1	0	0	2	2	10	1	1	2	2	0	3	1	0	53	2	2	1	0	9	0	0	0	365	3	4
970	62	1	65	168	23.03	0	2	2	1	0	0	1.1	1.8	0.7	0	1	1	0	0	1	1	1	14.9	1	1	2	2	0	1	1	0	45	1	0	2	0	9	0	0	0	365	1	0
971	84	1	83	174	27.4145	0	1	0	1	2	0	0.9	1.6	0.7	1	0	1	0	0	0	1	1	9.3	1	1	2	1	1	1	1	0	50	2	2	1	0	10	0	0	0	365	1	0
972	49	1	89	178	28.0899	0	2	0	0	0	0	0.78	0.9	0.12	0	0	0	0	0	0	1	1	14	1	0	2	1	1	1	1	0	60	2	2	1	0	5	0	0	0	365	0	0
973	82	1	83	163	31.2394	1	1	0	1	2	0	1	1.2	0.2	0	0	0	1	0	0	1	1	13.5	1	1	2	1	1	3	2	1	35	2	1	1	0	13	0	0	0	365	2	0
974	82	1	56	166	20.3223	0	1	1	1	0	0	1.21	1.5	0.29	0	0	0	0	1	0	4	1	15	0	0	2	3	0	1	1	0	60	2	1	2	0	6	0	60	1	60	0	0
975	81	0	75	152	32.4619	1	0	0	1	0	0	0.8	1.3	0.5	0	0	1	0	0	0	2	3	17.9	1	1	1	2	0	1	2	1	35	1	0	0	0	7	0	0	0	365	1	0
976	69	0	68	160	26.5625	0	0	0	1	0	0	0.8	1.1	0.3	0	0	1	0	0	0	4	2	12.6	1	1	2	1	1	1	1	0	45	2	2	1	0	6	0	0	0	365	1	0
977	69	1	80	175	26.1224	0	0	0	1	2	0	0.7	1.1	0.4	0	0	1	0	0	0	1	1	13.9	1	1	2	2	0	1	2	1	35	3	0	1	0	12	0	0	0	365	1	0
978	47	1	91	163	34.2504	1	0	0	1	0	0	0.9	1.2	0.3	0	0	0	0	0	0	1	1	14.4	0	0	2	3	0	1	1	0	63	2	1	2	0	4	1	0	0	365	0	0
979	43	1	85	180	26.2346	0	2	2	1	2	1	2.25	2.8	0.55	1	0	1	0	0	0	1	1	10.7	0	0	2	2	0	1	1	0	60	3	0	1	0	20	0	0	0	365	1	0
980	55	1					0	0	1	2	0	0.75	0.9	0.15	0	1	0	0	0	0	4	3	14.4	1	0	2	2	0	1	1	0	50	1	0	2	0	6	0	0	0	365	0	0
981	62	0	82	164	30.4878	1	2	0	1	0	0	0.68	0.68	0	0	0	0	0	0	0	1	1	13.6	0	1	2	3	0	1	1	0	64	2	2	1	0	4	0	0	0	365	0	0
982	70	1	90	182	27.1706	0	2	2	1	0	1	0.9	1.4	0.5	0	0	1	0	0	0	2	2	16	1	1	1	2	0	1	2	1	40	1	0	0	0	10	1	0	1	145	1	0
983	48	1					0	0	1	0	0	0.8	1.1	0.3	0	0	1	0	0	0	2	2	15	0	1	2	3	0	1	1	0	0	1	0	2	0	6	0	25	1	25	1	0
984	57	1	68	165	24.977	0	2	0	0	0	0	0.7	1	0.3	0	0	1	1	0	0	1	1	14	1	1	2	1	1	2	1	0	60	2	2	1	0	8	0	0	0	365	3	3
985	73	0	70	165	25.7117	0	1	0	1	0	0	0.3	1	0.7	1	1	1	0	0	0	4	2	10.4	1	1	1	2	0	1	1	0	65	2	2	1	0	17	0	0	0	365	1	0
986	60	1	72	173	24.0569	0	2	2	0	0	0	0.9	1	0.1	0	0	0	0	0	0	1	1	16.2	1	0	2	1	1	1	1	0	50	2	1	1	0	7	0	0	0	354	0	0
987	46	1	80	179	24.968	0	2	0	1	2	0	0.9	1.2	0.3	0	0	0	0	0	0	1	1	14	1	1	2	1	1	1	1	0	60	2	2	1	0	9	0	0	0	365	0	0
988	39	1	95	172	32.112	1	2	0	1	0	0	1	1.5	0.5	0	0	1	0	0	0	1	1	17	1	0	2	2	0	1	1	0	65	2	0	2	0	5	0	0	0	365	1	0
989	53	1	107	175	34.9388	1	2	0	1	2	0	1	1.3	0.3	0	0	1	1	0	0	1	1	17.2	1	1	2	2	0	3	2	1	35	1	0	2	0	10	0	0	0	365	3	3
990	74	1	67	166	24.3141	0	0	0	0	0	0	0.5	0.9	0.4	0	0	1	0	0	0	3	3	14.7	1	0	2	1	1	1	1	0	0	2	2	2	0	6	0	0	0	365	1	0
991	42	1	81	174	26.7539	0	2	0	0	0	0	0.6	1	0.4	0	0	1	0	0	0	1	1	15.2	1	1	2	2	0	1	1	0	0	2	1	1	0	9	0	0	0	365	1	0
992	71	1	80	175	26.1224	0	1	0	1	0	0	0	0		0	0	0	0	0	0	1	1	14.9	1	0	2	2	0	1	1	0	50	1	0	1	0	7	0	0	0	365	0	0
993	48	0	59	160	23.0469	0	0	0	1	0	0	0.7	0.9	0.2	1	0	0	0	0	0	1	1	11.4	1	1	2	1	1	1	2	1	40	2	2	1	0	6	0	0	0	365	0	0
994	60	1	70	170	24.2215	0	0	0	1	0	0	0.7	1	0.3	1	0	1	0	0	1	3	0	9.1	1	0	2	2	0	1	1	0	65	2	0	2	0	20	0	0	0	365	1	0
995	48	1	87	172	29.4078	0	2	2	0	0	0	0.8	0.9	0.1	0	0	0	0	0	0	1	1	14.8	1	0	2	2	0	1	1	0	0	2	1	1	0	4	0	0	0	365	0	0
996	70	0	61	160	23.8281	0	0	0	1	2	0	0.6	0.8	0.2	1	0	0	0	0	0	1	1	11	1	0	2	2	0	1	1	0	0	1	0	0	0	6	0	0	0	365	0	0
997	58	1	83	175	27.102	0	2	0	1	0	0	0.8	1.1	0.3	0	0	1	0	0	0	1	1	13.9	1	1	2	1	1	1	2	1	35	2	2	2	0	9	0	0	0	365	1	0
998	65	0	74	175	24.1633	0	0	0	1	0	0	0.55	0.7	0.15	0	0	0	0	0	0	1	1	13.4	1	1	2	2	0	1	1	0	50	2	2	1	0	6	0	0	0	365	0	0
999	57	1	59	165	21.6713	0	2	2	1	0	0	0.7	1.03	0.33	0	0	1	0	0	0	5	1	14.4	1	1	2	2	0	1	1	0	68	0	0	0	0	10	0	0	0	365	1	0
1000	69	0	61	160	23.8281	0	0	0	1	0	0	0.8	1.5	0.7	1	0	1	0	0	0	1	1	10.8	1	0	2	1	1	1	1	0	45	1	0	1	1	4	0	0	1	4	1	0
1001	97	1	66	165	24.2424	0	1	0	1	0	0	1.78	2.4	0.62	0	0	1	0	0	0	3	1	13.4	1	1	2	2	0	1	1	0	60	1	0	2	0	15	1	0	0	365	1	0
1002	42	1	58	158	23.2335	0	2	2	0	0	0	0.8	1	0.2	0	0	0	0	0	0	1	1	15.2	1	0	1	2	0	1	1	0	55	2	2	1	0	5	0	0	0	365	0	0
1003	57	1	73	174	24.1115	0	1	0	1	2	0	1.1	1.1	0	0	0	0	0	0	0	2	1	14.3	1	1	2	1	1	1	1	0	60	1	0	2	0	7	0	0	0	365	0	0
1004	80	0	78	150	34.6667	1	0	0	1	2	0	0.7	0.8	0.1	1	0	0	0	0	0	1	1	11.3	1	1	2	1	1	1	1	0	55	2	1	1	0	7	0	0	0	365	0	0
1005	64	1	67	175	21.8776	0	2	0	1	2	1	0	0		1	0	0	0	0	1	4	2	10.2	1	1	2	2	0	1	1	0	50	3	0	1	0	76	0	0	0	365	0	0
1006	50	1	110	180	33.9506	1	2	0	1	0	0	0.6	0.9	0.3	0	0	1	0	0	0	2	2	14.5	1	0	1	2	0	1	1	0	60	2	2	1	0	7	0	0	0	365	1	0
1007	76	1	86	175	28.0816	0	2	0	1	2	0	1.3	1.5	0.2	0	0	0	0	1	0	2	2	16	1	1	2	2	0	1	1	0	50	2	2	1	0	8	0	0	0	365	0	0
1008	51	1	92	167	32.9879	1	0	0	1	0	1	1.4	1.7	0.3	0	0	1	0	0	0	1	1	16.6	1	0	2	2	0	1	1	0	64	2	0	1	0	5	0	0	0	365	1	0
1009	52	1	78	171	26.6749	0	2	2	1	0	0	0.6	0.8	0.2	0	0	0	0	0	0	2	2	15.8	1	0	2	2	0	1	1	0	45	3	0	1	0	38	0	0	0	365	0	0
1010	82	1					1	0	0	0	0	0.7	0.9	0.2	1	0	0	0	1	0	1	1	12.6	0	0	2	3	0	1	1	0	55	0	0	0	0	12	1	0	1	165	0	0
1011	71	1	68	162	25.9107	0	0	0	1	0	0	0.4	0.9	0.5	1	0	1	1	0	0	2	2	12	1	0	2	1	1	2	2	1	37	2	1	1	0	40	1	0	0	365	3	4
1012	68	1	65	164	24.1672	0	1	0	0	0	0	0.6	0.7	0.1	0	0	0	0	0	0	1	1	17.2	0	1	2	3	0	1	1	0	65	2	2	1	0	14	0	0	0	365	0	0
1013	75	1	66	170	22.8374	0	2	0	0	0	0	0.4	0.67	0.27	1	1	0	0	0	0	1	1	12	1	0	1	2	0	1	1	0	60	2	2	1	0	5	0	0	0	365	0	0
1014	49	1	82	175	26.7755	0	2	2	0	0	0	1	1.2	0.2	0	0	0	1	0	0	1	1	14	1	0	2	2	0	2	2	1	30	3	0	1	0	39	0	0	0	365	2	0
1015	48	1	73	175	23.8367	0	2	0	0	0	0	0.6	1	0.4	0	0	1	0	0	0	1	1	16	1	0	2	1	1	1	1	0	50	2	1	1	0	8	0	0	0	365	1	0
1016	74	1	86	175	28.0816	0	0	0	1	2	0	1	1.6	0.6	1	1	1	0	0	1	1	1	11.4	1	0	2	2	0	1	1	0	50	1	0	0	0	16	0	62	1	62	1	0
1017	58	1	93	172	31.4359	1	1	0	1	2	0	0.88	1	0.12	0	0	0	0	0	0	1	1	15.4	0	1	2	3	0	1	1	0	66	0	0	0	0	6	0	0	0	365	0	0
1018	53	1	87	171	29.7527	0	2	0	0	0	0	0.8	1.1	0.3	1	1	1	0	0	0	1	1	11.7	1	0	2	2	0	1	1	0	60	1	0	2	0	13	0	0	0	365	1	0
1019	65	1					2	0	1	0	0	0.75	1	0.25	0	0	0	0	0	0	1	1	14.7	0	1	2	3	0	1	1	0	65	2	2	1	0	6	0	0	0	365	0	0
1020	91	0					0	0	1	0	0	0.7	1.1	0.4	0	0	1	1	0	0	1	1	12.2	1	0	2	2	0	2	1	0	60	0	0	0	0	13	0	0	0	118	3	4
1021	57	1					1	0	0	0	0	0.5	0.9	0.4	0	1	1	0	0	0	1	1	17.8	1	1	1	2	0	1	1	0	55	1	0	0	0	5	0	0	0	365	1	0
1022	58	0	97	170	33.564	1	2	0	1	2	0	0.7	0.9	0.2	0	0	0	0	0	0	1	1	14.7	1	1	2	1	1	1	1	0	65	2	2	1	0	5	0	0	0	365	0	0
1023	76	0					0	0	0	2	0	0.5	0.8	0.3	1	0	1	0	0	0	1	1	9.4	1	1	2	2	0	1	1	0	60	2	2	1	0	5	0	0	0	365	1	0
1024	55	1	84	163	31.6158	1	0	0	1	0	1	1.9	2.6	0.7	0	0	1	1	0	0	1	1	13.1	0	1	2	3	0	2	2	1	30	1	0	2	0	8	0	0	0	365	3	4
1025	59	1	81	165	29.7521	0	2	2	1	0	0	0.7	1.2	0.5	0	0	1	0	0	0	1	1	13.9	0	0	2	3	0	1	1	0	61	2	2	1	0	5	0	0	0	365	1	0
1026	38	1	120	180	37.037	1	2	0	0	0	0	0.9	1	0.1	0	0	0	0	0	0	2	2	14.4	1	1	2	1	1	1	1	0	60	2	2	1	0	6	0	0	0	365	0	0
1027	60	1	112	189	31.3541	1	0	0	1	2	0	1.17	1.2	0.03	0	0	0	0	0	0	1	1	12.8	0	1	2	3	0	1	1	0	0	1	0	2	0	3	1	0	0	365	0	0
1028	79	1	73	174	24.1115	0	1	0	0	2	1	3.8	4.5	0.7	1	0	1	1	0	0	1	1	9.9	1	0	2	2	0	3	1	0	49	1	0	0	0	10	1	0	1	197	3	4
1029	77	0	81	159	32.0399	1	0	0	0	0	0	0.7	0.9	0.2	0	0	0	0	0	0	1	1	14.4	0	0	2	3	0	1	1	0	45	2	2	2	0	12	0	0	0	365	0	0
1030	56	0	80	164	29.7442	0	1	0	1	0	0	0.8	1	0.2	0	1	0	0	0	0	1	1	13.5	1	0	2	1	1	1	1	0	60	2	2	1	0	6	0	0	0	365	0	0
1031	67	1	85	170	29.4118	0	1	0	1	0	1	1.27	1.5	0.23	0	0	0	0	0	0	1	1	14.8	1	1	2	2	0	1	1	0	65	1	0	1	0	2	0	0	0	365	0	0
1032	75	1	79	169	27.6601	0	1	0	1	2	0	1	1.7	0.7	1	1	1	0	0	1	5	5	11.9	0	0	2	3	0	1	1	0	63	3	0	1	0	17	0	0	0	365	1	0
1033	80	1	52	151	22.806	0	2	0	1	0	1	1.5	2.3	0.8	0	0	1	0	1	0	3	2	15.8	1	1	2	2	0	1	2	1	30	3	0	1	1	4	0	0	1	4	1	0
1034	68	0					0	0	0	0	0	0.66	0.9	0.24	0	0	0	0	0	0	2	3	13	0	0	2	3	0	1	1	0	60	1	0	2	0	9	0	0	0	365	0	0
1035	51	0	80	165	29.3848	0	2	0	1	2	0	0.82	1.4	0.58	1	0	1	0	0	0	1	1	11.9	1	1	2	1	1	2	2	1	35	2	2	2	0	12	0	0	0	365	1	0
1036	58	1	120	170	41.5225	1	0	0	1	0	0	0.7	1	0.3	0	0	1	0	0	0	1	1	14	1	0	2	2	0	1	1	0	70	2	0	2	0	6	0	0	0	365	1	0
1037	73	1	100	170	34.6021	1	2	0	1	2	0	0.8	1.2	0.4	0	0	1	0	0	0	1	1	15.5	1	1	2	1	1	1	1	0	60	2	2	1	0	7	0	0	0	365	1	0
1038	60	1	80	175	26.1224	0	0	0	0	2	0	1.2	1.8	0.6	1	0	1	1	0	0	1	1	12.4	1	0	2	1	1	4	3	1	25	2	2	2	1	2	0	0	1	2	3	4
1039	64	1	70	160	27.3437	0	2	0	0	2	0	0.56	1.1	0.54	1	0	1	1	0	0	3	1	12	1	0	1	1	1	3	3	1	25	1	0	0	0	9	1	0	1	8	3	4
1040	64	1	65	172	21.9713	0	2	2	0	0	0	0.7	0.9	0.2	0	1	0	0	0	0	1	1	14	1	0	1	1	1	1	1	0	0	2	2	1	0	11	0	0	0	365	0	0
1041	68	1	103	158	41.2594	1	1	0	1	2	1	1.9	2.3	0.4	0	0	1	0	0	0	3	3	12	1	1	1	2	0	1	2	1	33	3	0	0	0	7	1	0	1	106	1	0
1042	87	1					1	0	0	2	0	0.98	1.11	0.13	0	0	0	0	0	0	2	3	15	1	0	2	2	0	1	1	0	45	1	0	0	0	8	1	0	0	365	0	0
1043	56	1					1	2	1	0	0	0.71	0.9	0.19	0	0	0	0	0	0	1	1	17	0	1	2	3	0	1	1	0	59	1	0	0	0	6	0	0	0	365	0	0
1044	58	1	109	179	34.0189	1	0	0	0	0	0	0.78	1.1	0.32	0	0	1	0	0	0	4	2	16	0	1	2	3	0	1	1	0	50	2	0	1	0	3	0	0	0	365	1	0
1045	69	1					1	0	1	0	0	1	1.1	0.1	0	0	0	0	0	0	1	1	15.3	0	1	2	3	0	1	1	0	0	3	0	1	0	24	0	0	0	365	0	0
1046	84	1					0	0	1	0	1	1.43	2.1	0.67	1	1	1	0	0	0	2	2	11	1	1	2	2	0	1	1	0	45	1	0	2	0	4	1	115	1	115	1	0
1047	73	1	85	167	30.478	1	0	0	1	0	0	0.93	1.4	0.47	0	0	1	0	0	0	1	1	16.8	0	0	1	3	0	1	1	0	65	1	0	0	0	4	0	0	0	365	1	0
1048	61	0	82	161	31.6346	1	2	2	1	2	0	0.7	0.9	0.2	0	0	0	0	0	0	3	2	15	1	1	2	2	0	1	1	0	45	2	2	1	0	7	0	0	0	365	0	0
1049	59	1	95	172	32.112	1	1	0	1	0	0	0.8	0.95	0.15	0	1	0	0	0	0	1	1	16	0	1	2	3	0	1	1	0	60	3	0	1	0	25	0	0	0	365	0	0
1050	85	0	55	155	22.8928	0	0	0	1	0	0	0.49	1	0.51	1	0	1	0	0	0	1	1	11.9	1	0	2	1	1	1	2	1	40	2	2	1	0	14	0	0	0	365	1	0
1051	50	0	67	164	24.9108	0	0	0	0	0	0	0.6	0.9	0.3	1	0	1	0	0	0	2	2	11.5	1	0	2	2	0	1	1	0	55	2	2	2	0	7	0	0	0	365	1	0
1052	63	1	84	168	29.7619	0	1	0	1	2	1	1.2	1.5	0.3	1	0	1	0	0	0	2	2	12.8	0	1	2	3	0	1	1	0	50	2	2	2	0	15	0	38	1	38	1	0
1053	84	0					0	0	1	0	1	1	1.2	0.2	0	0	0	1	0	0	1	1	13.2	1	1	2	2	0	2	1	0	50	1	0	0	0	9	0	0	0	365	2	0
1054	86	0					0	0	1	2	0	0.9	1.3	0.4	0	0	1	0	0	0	3	1	15.5	1	1	2	2	0	3	1	0	45	0	0	2	0	9	1	0	0	365	1	0
1055	64	1	80	168	28.3447	0	2	0	1	0	0	1	1.2	0.2	0	0	0	0	0	1	1	1	15.6	1	0	2	1	1	1	1	0	60	1	0	2	0	12	0	0	0	365	0	0
1056	78	1	96	164	35.693	1	2	0	0	2	0	0.6	1.5	0.9	0	1	1	0	0	1	3	4	15	0	1	2	3	0	1	1	0	65	1	0	0	0	12	1	134	1	134	1	0
1057	57	1	85	169	29.7609	0	1	0	0	0	0	0.6	0.9	0.3	0	0	1	0	0	0	1	1	13.8	1	1	2	1	1	1	1	0	60	0	0	0	0	10	0	11	1	11	1	0
1058	61	0	94	170	32.526	1	2	0	0	0	0	0.6	0.8	0.2	0	0	0	0	0	0	4	1	14.6	0	0	2	3	0	1	1	0	0	3	0	1	0	7	0	0	0	365	0	0
1059	72	1	92	170	31.8339	1	1	0	1	0	1	1.3	1.4	0.1	1	0	0	0	0	0	1	1	122	0	0	2	3	0	1	1	0	62	2	2	2	0	7	0	253	1	253	0	0
1060	65	1	70	168	24.8016	0	1	0	1	2	0	0.7	0.8	0.1	0	0	0	0	0	0	4	2	13.7	1	1	2	1	1	1	1	0	60	2	2	2	0	11	0	0	0	365	0	0
1061	73	1	95	163	35.756	1	0	0	1	2	0	0.8	0.9	0.1	0	0	0	0	1	0	0	3	13	1	0	1	1	1	1	1	0	45	2	2	2	0	10	0	0	0	365	0	0
1062	74	1	78	180	24.0741	0	0	0	1	2	0	0.7	2.3	1.6	0	0	1	0	0	1	1	1	15	1	0	2	2	0	1	1	0	60	1	0	2	0	7	0	0	0	365	1	0
1063	70	1					1	0	1	2	1	1.6	3.3	1.7	1	0	1	1	0	0	1	1	10.7	1	0	2	2	0	3	1	0	50	1	0	0	0	46	0	0	0	365	3	4
1064	70	1	74	162	28.1969	0	0	0	0	0	0	0.67	1.1	0.43	0	0	1	0	0	0	1	1	16	1	0	2	2	0	1	1	0	65	2	2	1	0	31	0	0	0	365	1	0
1065	56	1	65	165	23.8751	0	0	0	1	0	0	1.1	1.5	0.4	1	0	1	0	0	0	1	1	12.6	1	0	2	2	0	1	1	0	55	3	0	1	0	29	0	0	0	365	1	0
1066	59	1	89	180	27.4691	0	2	0	1	0	0	0.85	1.4	0.55	0	0	1	0	0	0	2	1	14	0	1	2	3	0	1	1	0	45	2	2	1	0	6	0	0	0	365	1	0
1067	50	1	80	168	28.3447	0	2	0	0	0	0	0.8	1.2	0.4	0	0	1	0	0	0	1	1	17.05	1	0	2	1	1	1	1	0	45	1	0	1	0	13	0	0	0	365	1	0
1068	64	1	82	175	26.7755	0	0	2	1	0	0	0.7	0.9	0.2	0	1	0	1	0	0	1	1	13.9	1	0	2	1	1	2	1	0	58	3	0	1	0	23	1	0	0	365	2	0
1069	47	1	93	170	32.1799	1	0	0	0	2	0	0.6	1	0.4	0	0	1	0	0	0	1	1	15.9	1	1	2	1	1	1	1	0	45	3	0	1	0	1	0	95	1	95	1	0
1070	78	1	58	153	24.7768	0	1	0	1	0	1	1.2	1.7	0.5	0	0	1	1	0	0	5	1	14.2	1	1	2	1	1	3	2	1	35	1	0	2	0	12	0	0	0	365	3	4
1071	72	1	78	178	24.6181	0	0	0	0	0	0	0.6	0.9	0.3	0	0	1	0	0	0	1	1	14	1	0	2	1	1	1	1	0	45	2	2	1	0	6	0	0	0	0	1	0
1072	66	1	75	170	25.9516	0	1	0	1	0	0	0.9	1	0.1	0	0	0	0	0	0	1	1	13	1	0	2	1	1	1	1	0	50	2	2	1	0	11	0	0	0	365	0	0
1073	55	1	82	165	30.1194	1	1	0	1	2	0	0.7	1.2	0.5	0	0	1	0	0	0	1	1	14.3	0	1	2	3	0	1	1	0	63	2	2	1	0	5	0	0	0	365	1	0
1074	73	0	78	148	35.6099	1	0	0	1	2	1	3.3	7.7	4.4	1	0	1	0	0	0	2	1	9.9	1	0	2	2	0	1	1	0	45	2	2	1	0	9	1	0	0	365	1	0
1075	60	1					1	0	1	0	0	1.1	1.26	0.16	0	0	0	0	0	1	1	1	13.9	1	0	1	1	1	1	1	0	50	1	0	0	0	1	1	0	0	365	0	0
1076	54	1	80	169	28.0102	0	2	0	0	0	0	0.9	1	0.1	0	0	0	0	0	0	2	2	17	1	0	2	1	1	1	1	0	50	2	2	1	0	5	0	0	0	365	0	0
1077	73	1	82	176	26.4721	0	1	0	1	0	0	1	1.01	0.01	0	0	0	0	0	0	1	1	14.6	1	0	2	2	0	1	1	0	55	3	0	1	0	8	0	51	1	51	0	0
1078	46	0	78	169	27.31	0	0	0	0	2	0	0.57	0.66	0.09	0	0	0	0	0	0	2	2	12.6	0	1	2	3	0	1	1	0	0	3	0	1	0	33	0	0	0	365	0	0
1079	81	1	75	174	24.7721	0	0	0	1	2	1	1	1.6	0.6	0	0	1	0	0	0	1	1	15	1	0	1	1	1	1	2	1	40	2	2	1	0	17	1	0	1	293	1	0
1080	80	1	72	168	25.5102	0	1	0	1	0	0	1.2	1.34	0.14	0	1	0	0	0	0	1	1	15	0	0	2	3	0	1	1	0	0	1	0	0	0	5	0	0	0	365	0	0
1081	55	0					1	0	0	0	0	0.9	2	1.1	0	1	1	0	0	0	4	2	14	0	0	2	3	0	1	0		0	1	0	2	0	6	0	0	0	0	1	0
1082	45	1	102	172	34.4781	1	1	0	1	0	0	0.99	1.02	0.03	0	0	0	0	0	0	2	2	14	1	0	2	1	1	1	1	0	70	3	0	0	0	10	0	0	0	365	0	0
1083	46	1	90	185	26.2966	0	2	0	0	0	0	0.9	1.3	0.4	0	0	1	0	0	0	1	1	14	1	0	2	1	1	1	1	0	0	2	2	1	0	9	0	0	0	365	1	0
1084	59	1	82	171	28.0428	0	0	0	1	0	0	0.8	1	0.2	0	0	0	0	0	0	4	3	14	1	1	2	1	1	1	1	0	50	2	2	2	0	16	0	0	0	365	0	0
1085	74	1	106	160	41.4062	1	2	0	1	0	0	1	1.6	0.6	0	0	1	1	1	0	1	1	16.2	1	0	2	1	1	2	2	1	30	2	1	1	1	9	0	0	1	9	3	4
1086	72	1	47	161	18.132	0	1	0	0	0	0	0.76	1.2	0.44	0	1	1	0	0	0	2	3	14.6	0	1	2	3	0	1	3	1	30	2	2	2	0	23	0	0	0	365	1	0
1087	53	0	74	162	28.1969	0	2	0	0	0	0	0.7	1.1	0.4	0	0	1	0	0	0	2	2	14.3	1	1	2	1	1	1	1	0	45	2	2	1	0	9	0	0	0	365	1	0
1088	65	0	49	146	22.9874	0	2	0	1	0	1	1.08	1.9	0.82	0	0	1	0	0	0	1	1	14	0	1	2	3	0	1	1	0	0	1	0	1	0	7	0	0	0	365	1	0
1089	53	1	86	171	29.4108	0	2	0	1	0	0	0.8	1.3	0.5	1	1	1	0	0	0	1	1	12.9	1	1	1	1	1	1	1	0	0	2	0	1	0	9	0	0	0	365	1	0
1090	89	1					1	0	1	0	1	1.4	2.5	1.1	1	0	1	0	1	0	2	1	11	1	0	2	1	1	1	1	0	0	1	0	2	0	11	1	0	1	108	1	0
1091	51	1	72	162	27.4348	0	2	2	0	0	0	0.6	0.9	0.3	0	0	1	0	0	0	1	1	16.2	1	0	2	1	1	1	1	0	60	2	2	1	0	9	0	0	0	365	1	0
1092	76	0	80	150	35.5556	1	0	0	1	2	0	0.7	1	0.3	0	0	1	0	0	0	5	1	13.1	1	1	2	2	0	1	1	0	60	3	0	2	0	46	0	0	0	365	1	0
1093	53	1	70	175	22.8571	0	2	2	0	0	0	0.6	0.9	0.3	0	0	1	0	0	0	1	1	16	1	1	2	3	0	1	1	0	60	1	0	0	0	16	0	0	0	365	1	0
1094	61	1	83	169	29.0606	0	2	0	0	0	0	1.1	1.2	0.1	0	0	0	0	0	0	1	1	14.8	0	1	2	3	0	1	1	0	65	2	1	1	0	4	0	0	0	365	0	0
1095	61	1	102	172	34.4781	1	2	2	1	0	0	0.9	1.17	0.27	0	0	0	0	0	1	1	1	14.9	1	1	2	2	0	1	1	0	71	2	2	2	0	5	0	0	0	365	0	0
1096	72	1	95	174	31.378	1	1	0	0	0	0	1.13	1.4	0.27	0	0	0	1	0	0	1	1	14.5	1	1	2	2	0	1	1	0	63	2	1	2	0	8	0	0	0	365	2	0
1097	77	1	80	179	24.968	0	1	1	0	0	0	0.6	0.7	0.1	0	1	0	0	1	1	3	3	14	1	0	2	1	1	1	2	1	40	2	1	2	0	9	0	238	1	238	0	0
1098	69	1	101	174	33.3598	1	1	2	1	2	0	0.8	1.1	0.3	0	0	1	1	0	1	1	1	15.6	1	0	2	2	0	3	1	0	45	2	1	2	0	22	1	0	0	365	3	3
1099	70	0	77	154	32.4675	1	0	0	1	0	0	0.5	1	0.5	0	0	1	0	0	0	1	1	15	1	1	2	1	1	1	1	0	50	2	2	1	0	11	0	2	1	2	1	0
1100	54	1	77	169	26.9598	0	2	0	1	0	0	0.7	0.9	0.2	0	0	0	0	1	0	1	1	13.9	1	1	2	1	1	1	1	0	45	2	1	1	0	11	0	0	0	365	0	0
1101	76	1	90	175	29.3878	0	1	0	1	0	0	0.9	1	0.1	0	0	0	0	0	0	1	1	13.5	1	1	2	2	0	1	1	0	61	1	0	2	0	5	0	0	0	365	0	0
1102	60	0	89	154	37.5274	1	1	0	1	0	0	0.78	0.9	0.12	0	0	0	0	0	1	1	1	15.1	0	0	2	3	0	1	1	0	0	2	1	1	0	4	0	0	0	365	0	0
1103	75	1	70	176	22.5981	0	2	0	0	2	0	0.8	1	0.2	0	0	0	1	0	1	1	1	15.3	1	0	2	2	0	4	1	0	45	3	0	0	0	3	0	0	0	365	2	0
1104	51	1	83	165	30.4867	1	1	0	0	2	0	0.4	0.6	0.2	0	0	0	0	0	0	1	1	14.9	0	1	2	3	0	1	1	0	65	2	2	2	0	6	0	0	0	365	0	0
1105	52	1	78	184	23.0388	0	2	2	1	0	0	0.8	1.1	0.3	0	0	1	0	0	0	1	1	17.4	0	1	2	3	0	1	1	0	44	2	1	1	0	4	0	0	0	365	1	0
1106	45	1	85	176	27.4406	0	2	2	0	0	0	0.6	0.82	0.22	0	0	0	0	0	0	2	2	15.7	1	0	2	2	0	1	2	1	35	2	2	2	0	5	1	0	0	365	0	0
1107	71	1	82	169	28.7105	0	1	2	1	2	0	0.7	0.9	0.2	0	0	0	0	0	0	3	2	13.2	1	0	2	1	1	1	1	0	60	2	2	2	0	11	0	0	0	365	0	0
1108	73	1	76	161	29.3199	0	0	0	1	0	0	1	1.1	0.1	1	0	0	0	0	0	1	1	12.7	0	1	2	3	0	1	0		0	2	2	2	0	1	0	94	1	94	0	0
1109	47	1	140	175	45.7143	1	0	0	1	2	0	0.61	0.8	0.19	0	1	0	0	0	0	1	1	14	1	1	2	2	0	1	1	0	65	2	2	2	0	6	0	0	0	365	0	0
1110	62	1	83	175	27.102	0	1	0	1	2	0	0.8	0.9	0.1	0	0	0	0	0	0	1	1	16	1	0	2	1	1	1	2	1	40	2	2	1	0	10	0	0	0	365	0	0
1111	55	1					0	2	1	0	0	0.6	0.8	0.2	0	0	0	0	0	0	3	2	13.8	1	0	2	2	0	1	2	1	40	1	0	0	0	9	0	0	0	365	0	0
1112	91	0					0	0	0	2	0	0.7	1.8	1.1	0	0	1	1	0	0	1	1	13.6	1	0	1	2	0	3	2	1	35	1	0	0	0	10	1	0	1	51	3	4
1113	50	1	90	175	29.3878	0	2	2	0	0	0	0.8	0.9	0.1	0	0	0	0	0	0	2	2	15.6	1	0	1	1	1	1	2	1	30	2	2	1	0	6	0	0	0	365	0	0
1114	63	1	83	170	28.7197	0	2	0	0	0	0	0.8	1.2	0.4	0	0	1	0	0	0	1	1	14.6	1	0	2	2	0	1	1	0	60	2	2	1	0	4	0	0	0	365	1	0
1115	48	1	62	168	21.9671	0	2	2	0	0	0	0.5	0.74	0.24	0	0	0	0	0	0	1	1	14.2	1	0	2	1	1	1	1	0	60	2	2	2	0	11	0	0	0	365	0	0
1116	75	1	70	169	24.5089	0	0	0	0	0	0	0.8	1.1	0.3	0	0	1	0	0	0	1	1	13.1	1	0	2	1	1	1	2	1	30	2	2	2	0	28	0	0	0	365	1	0
1117	45	1	91	179	28.4011	0	2	2	0	0	0	0.7	0.9	0.2	0	0	0	0	0	0	2	2	15.4	0	1	2	3	0	1	1	0	0	2	2	1	0	4	0	0	0	0	0	0
1118	54	1	76	160	29.6875	0	0	0	1	2	0	0.77	0.9	0.13	0	1	0	0	0	0	5	2	13.5	1	0	2	2	0	1	1	0	65	3	0	1	0	11	0	0	0	365	0	0
1119	59	1	79	179	24.6559	0	0	0	1	2	0	0.79	1	0.21	0	0	0	0	0	0	2	2	14.4	0	0	2	3	0	1	1	0	45	1	0	2	0	7	0	0	0	365	0	0
1120	67	1	70	175	22.8571	0	1	0	1	0	1	0.85	1.3	0.45	1	0	1	0	0	0	2	3	12	1	0	2	2	0	1	1	0	52	1	0	0	0	3	0	0	0	365	1	0
1121	66	1	85	172	28.7317	0	2	0	1	0	0	0.9	1	0.1	0	0	0	0	0	0	1	1	16.1	1	0	2	2	0	1	1	0	0	1	0	1	0	12	0	0	0	365	0	0
1122	58	1	93	170	32.1799	1	1	0	0	0	0	1	1.03	0.03	0	0	0	0	0	0	1	1	14	0	1	2	3	0	1	1	0	60	3	0	1	0	25	0	0	0	365	0	0
1123	62	1	84	164	31.2314	1	2	2	0	2	0	0.3	0.6	0.3	0	0	1	1	0	0	2	1	15	1	0	2	2	0	3	1	0	60	1	0	0	0	4	0	14	1	14	3	3
1124	61	1	89	173	29.737	0	1	0	1	0	0	0.97	1.1	0.13	0	0	0	0	0	0	1	1	15.4	0	1	2	3	0	1	1	0	0	3	0	1	0	8	0	0	0	365	0	0
1125	48	1	85	178	26.8274	0	1	0	1	0	0	0	0		0	0	0	0	0	0	2	2	0	1	0	2	1	1	1	1	0	50	2	0	2	0	11	0	0	0	365	0	0
1126	50	1	106	180	32.716	1	0	0	1	0	0	0.67	1	0.33	0	0	1	1	0	0	2	1	14.7	1	1	2	1	1	2	3	1	25	2	1	2	0	34	0	0	0	365	3	3
1127	64	1	90	172	30.4218	1	1	0	1	2	0	0.9	1.4	0.5	0	0	1	0	0	0	4	2	13	1	0	2	1	1	1	3	1	25	2	2	2	0	14	0	0	0	365	1	0
1128	74	1					0	0	1	2	0	0.7	0.9	0.2	0	0	0	0	0	0	1	1	15.2	0	1	2	3	0	1	2	1	40	2	2	1	0	3	0	0	0	365	0	0
1129	73	1	78	170	26.9896	0	1	2	1	2	0	0.91	1.6	0.69	1	0	1	1	0	0	1	1	11.8	1	1	2	2	0	4	2	1	35	3	0	0	0	16	0	0	0	365	3	4
1130	62	1	79	162	30.1021	1	2	0	0	0	0	0.8	0.9	0.1	0	0	0	0	0	0	1	1	15	0	1	2	3	0	1	1	0	61	3	0	1	0	32	0	0	0	365	0	0
1131	61	1	66	168	23.3844	0	0	0	0	0	0	0.79	1.1	0.31	0	0	1	0	0	0	1	1	13.1	1	0	2	1	1	1	1	0	60	2	1	1	0	8	0	0	0	365	1	0
1132	62	0	83	160	32.4219	1	1	0	1	0	0	0.4	0.58	0.18	1	0	0	0	0	0	1	1	11	1	1	2	2	0	1	1	0	50	2	2	1	0	7	0	0	0	365	0	0
1133	40	1	90	176	29.0548	0	2	2	0	2	0	0.5	1	0.5	0	0	1	0	0	0	2	4	16	1	1	2	2	0	1	1	0	54	3	0	0	0	34	0	0	0	0	1	0
1134	74	1	87	168	30.8248	1	1	0	0	0	0	0.7	0.86	0.16	0	0	0	0	0	0	2	1	13	0	0	2	3	0	1	1	0	0	3	0	1	0	27	0	0	0	365	0	0
1135	65	1	70	175	22.8571	0	2	2	0	0	0	0.9	1.5	0.6	0	0	1	1	0	0	1	1	16	1	0	2	1	1	4	2	1	30	2	0	2	1	13	0	0	1	13	3	4
1136	75	0	64	163	24.0882	0	0	0	0	0	0	0.7	0.84	0.14	0	0	0	0	0	0	1	1	12	1	0	2	2	0	1	1	0	65	2	2	1	0	6	0	0	0	365	0	0
1137	53	0					2	0	1	2	1	3.5	4.3	0.8	1	0	1	1	0	0	3	1	10.7	1	1	2	2	0	4	0		0	1	0	0	1	1	0	0	1	1	3	4
1138	48	1	90	174	29.7265	0	0	0	1	0	0	1.1	1.3	0.2	0	0	0	0	0	0	1	1	15.6	1	1	2	1	1	1	1	0	60	2	2	1	0	7	0	0	0	365	0	0
1139	78	1	80	165	29.3848	0	1	0	0	0	0	0.8	1.2	0.4	0	0	1	0	1	1	3	1	15	1	1	2	2	0	1	1	0	44	1	0	0	1	6	0	0	1	6	1	0
1140	75	1	96	162	36.5798	1	0	0	1	2	0	0.94	1.5	0.56	0	0	1	0	0	0	2	2	15.6	1	1	2	2	0	1	1	0	65	1	0	2	0	7	0	299	1	299	1	0
1141	55	1	110	180	33.9506	1	2	0	1	0	0	0.6	1	0.4	0	0	1	0	0	0	1	1	14.7	1	0	1	1	1	1	1	0	50	2	1	1	0	5	0	0	0	365	1	0
1142	46	0	66	166	23.9512	0	2	0	0	0	0	0.4	0.6	0.2	1	0	0	0	0	0	1	1	11.9	1	0	2	2	0	1	1	0	60	1	0	0	0	9	0	0	0	365	0	0
1143	78	0	71	157	28.8044	0	0	0	1	0	0	0.9	1.1	0.2	0	0	0	0	0	0	1	1	12.7	1	0	2	2	0	1	1	0	45	2	2	1	0	7	0	0	0	365	0	0
1144	80	1	85	180	26.2346	0	0	0	0	0	0	0.9	0.9	0	0	0	0	0	0	0	1	1	0	0	0	2	1	1	1	1	0	0	2	1	1	0	4	1	0	0	365	0	0
1145	67	1	92	155	38.2934	1	0	0	0	2	0	0.9	1	0.1	0	0	0	0	0	0	1	1	14	1	0	2	2	0	1	1	0	55	2	2	1	0	4	0	0	0	365	0	0
1146	80	1	75	172	25.3515	0	1	1	0	0	0	0.7	1	0.3	0	0	1	0	1	0	1	1	14	0	0	2	3	0	1	2	1	35	3	0	0	0	37	0	0	0	365	1	0
1147	68	0	45	153	19.2234	0	2	0	1	0	1	1.45	1.5	0.05	0	0	0	0	0	0	1	1	13	0	1	2	3	0	1	1	0	65	1	0	2	0	10	0	0	0	365	0	0
1148	70	1	75	177	23.9395	0	0	0	1	2	0	0.9	1.6	0.7	1	0	1	0	0	0	2	2	11	1	1	2	1	1	1	2	1	35	1	0	2	0	14	0	0	0	365	1	0
1149	42	1	107	170	37.0242	1	1	0	1	2	1	0.7	1	0.3	0	0	1	0	0	0	1	1	17	1	1	2	2	0	1	1	0	55	3	0	1	0	34	0	0	0	365	1	0
1150	54	0	60	154	25.2994	0	2	0	0	0	0	0.5	0.7	0.2	0	0	0	0	0	0	1	1	12.1	1	1	2	2	0	1	1	0	60	2	0	2	0	9	0	0	0	365	0	0
1151	31	1	110	183	32.8466	1	2	0	0	0	0	0.8	0.8	0	0	0	0	0	0	0	3	5	15	1	0	2	1	1	1	1	0	50	2	2	1	0	6	0	0	0	365	0	0
1152	50	1	95	178	29.9836	0	2	0	1	2	0	0.7	1	0.3	0	0	1	0	1	0	1	1	14.3	1	1	1	1	1	1	1	0	0	2	1	1	0	8	0	0	0	365	1	0
1153	70	0	71	162	27.0538	0	0	0	0	2	0	0.6	0.9	0.3	0	0	1	1	0	0	1	1	13.6	1	0	2	1	1	2	1	0	50	2	2	2	0	38	0	51	1	51	3	3
1154	47	0	69	157	27.993	0	1	0	1	0	0	0.64	0.9	0.26	0	0	0	0	0	0	1	1	14.8	1	0	2	1	1	1	1	0	50	2	2	1	0	12	0	0	0	365	0	0
1155	78	1	56	156	23.0112	0	0	2	0	2	0	0.9	0.99	0.09	0	1	0	0	0	1	1	1	15.5	1	1	1	1	1	1	2	1	30	3	0	0	0	16	0	0	0	365	0	0
1156	72	1	74	164	27.5134	0	1	0	0	0	0	0.7	0.8	0.1	0	0	0	0	0	0	1	1	13.2	0	0	2	3	0	1	1	0	60	3	0	0	0	31	0	0	0	365	0	0
1157	84	1					1	0	1	0	1	1.3	2.3	1	1	0	1	1	0	1	1	1	10.6	1	0	2	1	1	4	1	0	45	2	0	0	1	9	0	0	1	9	3	4
1158	53	1	74	172	25.0135	0	2	0	1	0	0	0.8	1.1	0.3	0	0	1	0	0	1	1	1	16.2	1	1	2	1	1	1	2	1	35	2	2	2	0	12	0	0	0	365	1	0
1159	54	1	86	176	27.7634	0	1	0	1	2	0	0.8	1	0.2	0	0	0	0	0	0	4	2	15	0	0	2	3	0	1	1	0	0	2	2	2	0	6	0	0	0	365	0	0
1160	76	0					0	0	1	0	0	0.67	0.7	0.03	0	0	0	0	0	0	1	1	13.9	1	1	2	2	0	1	1	0	0	0	0	1	0	5	0	0	0	365	0	0
1161	55	1	58	165	21.3039	0	1	0	0	0	0	1	1.2	0.2	0	0	0	0	0	0	2	1	13.5	1	0	2	2	0	1	3	1	25	2	1	2	0	11	0	0	0	365	0	0
1162	60	1	72	169	25.2092	0	1	0	0	0	0	1.02	1.32	0.3	1	0	1	0	0	0	2	2	11	1	1	2	2	0	1	3	1	60	1	0	2	0	39	1	0	1	155	1	0
1163	64	1	83	165	30.4867	1	2	2	0	0	0	0.7	1	0.3	0	0	1	0	0	0	1	1	13.3	1	0	2	1	1	1	1	0	45	2	2	1	0	5	0	0	0	365	1	0
1164	69	0	50	150	22.2222	0	0	0	0	0	0	0.6	0.68	0.08	1	0	0	0	0	0	3	2	11.1	1	1	2	1	1	1	2	1	40	1	0	2	0	15	0	0	0	365	0	0
1165	80	0	86	140	43.8776	1	0	0	1	2	0	0.57	1	0.43	0	0	1	1	1	1	1	1	12.7	1	1	2	2	0	2	1	0	0	1	0	1	0	9	0	0	0	365	3	4
1166	78	1	78	172	26.3656	0	1	0	0	0	1	1.3	2.7	1.4	0	0	1	1	0	1	4	1	17	0	0	2	3	0	2	1	0	65	3	0	0	1	22	0	0	1	22	3	4
1167	41	1	85	169	29.7609	0	2	2	0	0	0	0.9	0.9	0	0	0	0	0	0	0	1	1	15	1	0	2	2	0	1	1	0	55	1	0	2	0	10	0	0	0	365	0	0
1168	58	1					2	0	1	0	0	0.7	0.9	0.2	0	0	0	0	0	0	4	2	14	1	0	2	3	0	1	1	0	65	2	1	1	0	5	0	0	0	365	0	0
1169	89	0					0	0	1	2	0	0.6	0.7	0.1	0	0	0	1	0	1	1	1	14.7	1	1	2	2	0	3	1	0	50	1	0	0	0	7	1	0	0	365	2	0
1170	73	1	94	172	31.7739	1	0	0	1	2	0	0.89	1	0.11	0	0	0	0	0	1	1	1	13.4	0	1	2	3	0	1	1	0	65	2	1	1	0	3	0	0	0	365	0	0
1171	55	1	64	160	25	0	2	0	0	0	0	0.6	0.8	0.2	1	0	0	0	0	0	2	1	12.6	1	1	1	2	0	1	1	0	65	2	1	2	0	8	0	6	1	6	0	0
1172	74	1	94	167	33.705	1	0	0	0	0	0	0.9	1.02	0.12	0	0	0	0	0	0	3	2	13.1	0	0	2	3	0	1	1	0	60	1	0	2	0	17	0	0	0	365	0	0
1173	64	1	52	155	21.6441	0	2	2	0	0	0	0.7	0.9	0.2	0	0	0	0	0	0	1	1	16.1	1	0	2	1	1	1	1	0	50	1	0	0	0	7	0	44	1	44	0	0
1174	67	1	89	170	30.7958	1	0	0	1	2	0	0.82	1.1	0.28	1	0	0	0	0	0	4	2	12.2	1	1	2	2	0	1	1	0	0	1	0	2	0	3	0	91	1	91	0	0
1175	55	1	114	179	35.5794	1	1	0	1	0	0	0.6	0.8	0.2	0	0	0	0	0	0	4	5	16	0	1	1	3	0	1	1	0	0	1	0	0	0	5	0	0	0	365	0	0
1176	49	1					0	0	1	0	0	1.2	1.7	0.5	0	0	1	0	0	0	1	1	15.9	1	1	2	1	1	1	1	0	60	2	0	1	0	9	0	11	1	11	1	0
1177	55	1	65	170	22.4913	0	1	0	0	0	0	0.9	1	0.1	0	0	0	0	0	0	3	2	13.5	0	1	2	3	0	1	1	0	0	1	0	0	0	8	0	30	1	30	0	0
1178	52	1	110	167	39.4421	1	0	2	1	2	0	0.7	0.91	0.21	0	0	0	0	0	0	2	2	14.6	1	0	2	2	0	1	1	0	50	2	2	2	0	6	0	161	1	161	0	0
1179	70	1	95	175	31.0204	1	0	0	1	0	1	7.4	12.8	5.4	1	1	1	1	0	0	1	1	11.9	1	1	2	1	1	4	1	0	45	1	0	2	1	14	0	0	1	14	3	4
1180	79	1	75	164	27.8852	0	0	0	1	2	0	1.5	2	0.5	1	0	1	1	0	0	2	2	12.7	1	1	2	2	0	4	2	1	35	1	0	0	1	4	0	0	1	4	3	4
1181	80	0	59	151	25.8761	0	0	0	1	2	0	0.64	1	0.36	0	0	1	1	0	0	4	2	12.6	1	0	2	2	0	2	1	0	40	1	0	0	0	7	0	0	0	365	3	3
1182	52	1	82	180	25.3086	0	2	2	0	0	0	0.6	1	0.4	0	0	1	0	0	0	1	1	14.5	1	0	2	1	1	1	1	0	55	2	0	2	0	10	0	0	0	365	1	0
1183	69	1	101	180	31.1728	1	0	2	1	0	0	0.6	0.8	0.2	1	1	0	0	0	0	4	2	11	0	1	2	3	0	1	1	0	60	2	2	2	0	7	0	0	0	365	0	0
1184	83	1	53	150	23.5556	0	1	0	1	0	0	0.7	0.8	0.1	1	0	0	0	0	0	1	1	12.8	1	1	2	2	0	1	1	0	65	2	2	1	0	8	0	0	0	365	0	0
1185	68	0	95	175	31.0204	1	2	0	1	2	0	0.6	1	0.4	0	0	1	0	0	0	1	1	12.6	1	1	2	1	1	1	2	1	40	2	2	2	0	8	0	0	0	365	1	0
1186	78	0	85	160	33.2031	1	0	0	1	2	0	0.5	1	0.5	1	0	1	0	0	0	1	1	8.9	1	1	1	2	0	1	2	1	40	2	1	1	0	22	0	0	0	365	1	0
1187	42	1	80	165	29.3848	0	2	0	1	2	0	0.6	0.8	0.2	0	0	0	0	0	0	3	2	14	0	1	2	3	0	1	1	0	0	2	1	1	0	6	0	0	0	365	0	0
1188	54	1	87	185	25.42	0	1	0	0	0	0	0.9	1.2	0.3	0	0	0	0	0	0	1	1	14.7	1	1	2	1	1	1	1	0	55	2	2	1	0	4	0	0	0	365	0	0
1189	90	1					0	0	0	0	0	1.1	2.1	1	0	0	1	1	0	1	1	1	14	1	1	2	1	1	3	2	1	35	1	0	0	1	7	0	0	1	7	3	4
1190	68	0	74	164	27.5134	0	0	0	1	2	0	0.5	0.9	0.4	0	0	1	0	0	0	2	2	14.8	1	0	2	2	0	1	1	0	50	1	0	2	0	8	0	0	0	365	1	0
1191	86	0	58	150	25.7778	0	0	0	1	2	0	0.7	1	0.3	0	0	1	1	0	0	4	2	13.8	1	1	1	2	0	2	1	0	65	1	0	0	0	7	0	0	0	365	3	3
1192	48	1	95	175	31.0204	1	1	0	0	0	0	0.97	1.1	0.13	0	0	0	0	0	0	2	2	14.8	0	1	2	2	0	1	1	0	65	2	1	1	0	4	0	0	0	365	0	0
1193	65	0					2	0	1	0	0	0.5	0.6	0.1	0	0	0	0	0	0	1	1	14.9	1	0	2	1	1	1	1	0	55	1	0	2	0	10	0	0	0	365	0	0
1194	30	1	67	173	22.3863	0	2	2	0	0	0	0.6	1.1	0.5	0	0	1	0	0	0	3	2	14.4	1	0	2	1	1	1	1	0	65	1	0	0	0	6	0	0	0	365	1	0
1195	46	1	115	168	40.7455	1	2	2	1	0	0	0.7	0.86	0.16	0	0	0	0	0	0	1	1	15.8	0	0	2	3	0	1	1	0	55	1	0	0	0	7	0	0	0	365	0	0
1196	70	1	81	177	25.8546	0	1	0	1	2	1	5.1	12	6.9	1	0	1	0	0	0	1	1	11.5	0	1	1	3	0	1	2	1	35	2	2	1	0	21	0	0	0	365	1	0
1197	55	1	78	172	26.3656	0	2	0	1	0	0	0.9	1	0.1	0	0	0	0	0	0	1	1	16.8	1	1	2	1	1	1	1	0	55	2	1	1	0	26	0	0	0	365	0	0
1198	84	1					0	0	1	2	0	1.1	1.3	0.2	1	0	0	1	0	0	1	1	12.6	1	1	2	1	1	3	2	1	35	0	0	0	0	303	1	0	1	217	2	0
1199	79	1	77	170	26.6436	0	0	0	1	2	0	1.1	1.3	0.2	0	0	0	0	0	0	1	1	0	0	0	2	3	0	1	1	0	65	2	2	2	0	17	0	0	0	365	0	0
1200	32	1	178	93	205.804	1	2	2	0	0	0	0.6	0.7	0.1	0	0	0	0	0	0	2	2	16	1	0	1	1	1	1	1	0	60	2	2	1	0	7	0	0	0	365	0	0
1201	75	1	86	179	26.8406	0	1	0	1	0	0	0.9	1.9	1	0	0	1	0	1	0	4	2	14.5	1	0	2	2	0	1	1	0	45	1	0	0	0	25	1	0	0	365	1	0
1202	65	1	85	172	28.7317	0	1	1	1	0	0	0.9	1.4	0.5	1	0	1	1	0	1	3	2	7.9	1	1	2	1	1	4	1	0	46	2	0	2	0	16	0	0	0	365	3	4
1203	69	0	53	154	22.3478	0	0	0	1	2	0	0.95	1.1	0.15	1	0	0	0	0	0	5	1	10.4	0	1	2	3	0	1	1	0	0	3	0	1	0	36	0	0	0	365	0	0
1204	54	1	105	187	30.0266	1	2	0	1	0	0	0.9	1.1	0.2	0	0	0	0	0	0	1	1	16.8	0	0	2	3	0	1	1	0	60	3	0	1	0	2	0	0	0	365	0	0
1205	67	0	63	155	26.2227	0	0	0	0	0	0	0.4	0.6	0.2	1	0	0	0	0	0	1	1	10	1	0	2	1	1	1	1	0	65	2	2	1	0	10	0	0	0	365	0	0
1206	70	0	82	155	34.1311	1	1	0	1	2	0	0.6	1	0.4	0	0	1	0	0	0	1	1	16	0	1	2	3	0	1	1	0	65	3	0	1	0	31	0	0	0	365	1	0
1207	66	0	78	157	31.6443	1	0	0	1	2	0	0.95	1.1	0.15	1	0	0	0	0	0	4	3	11.3	0	0	2	3	0	1	1	0	0	2	2	2	0	20	0	0	0	365	0	0
1208	70	1	69	169	24.1588	0	1	0	1	2	0	0.66	1	0.34	0	1	1	0	0	0	4	1	13	0	1	2	3	0	1	1	0	0	3	0	1	0	54	0	0	0	365	1	0
1209	56	1	102	150	45.3333	1	1	2	1	2	0	0.6	1	0.4	0	0	1	0	1	0	1	1	14	1	1	2	1	1	1	1	0	55	2	2	1	0	5	0	0	0	365	1	0
1210	65	1	81	178	25.565	0	0	0	1	0	0	0.85	1	0.15	0	0	0	0	0	0	3	2	14	0	1	1	3	0	1	1	0	64	2	2	1	0	5	0	0	0	365	0	0
1211	74	0	60	158	24.0346	0	0	0	0	0	0	0.81	1	0.19	0	0	0	1	0	0	1	1	12.1	1	1	2	2	0	2	2	1	40	2	2	1	0	6	1	0	1	122	2	0
1212	43	1	80	170	27.6817	0	2	0	0	0	0	0.9	1	0.1	0	0	0	0	0	0	1	1	13.6	1	1	2	1	1	1	1	0	45	2	1	1	0	5	0	0	0	365	0	0
1213	61	1					2	0	0	0	0	0.9	1.4	0.5	0	0	1	0	0	0	1	1	13.3	1	0	2	1	1	1	2	1	35	2	2	1	0	10	0	0	0	365	1	0
1214	56	0	85	163	31.9922	1	1	0	0	0	0	0.6	1	0.4	1	0	1	0	0	0	1	1	10.6	1	0	2	1	1	1	2	1	35	2	2	1	0	8	1	27	1	27	1	0
1215	71	1	81	172	27.3797	0	2	0	1	0	0	0.97	1	0.03	0	1	0	0	0	1	1	1	15.2	1	0	2	1	1	1	2	1	40	2	2	1	0	9	1	0	0	365	0	0
1216	72	0	74	160	28.9062	0	0	0	1	2	0	0.77	0.9	0.13	0	0	0	0	0	0	4	3	12	0	0	2	3	0	1	1	0	72	2	2	1	0	5	0	0	0	365	0	0
1217	68	1	62	162	23.6244	0	1	0	0	2	0	1.1	1.4	0.3	0	0	0	0	0	0	2	2	13.6	1	1	2	2	0	1	2	1	35	2	2	1	0	11	0	0	0	365	0	0
1218	51	1	75	169	26.2596	0	2	0	1	0	0	0.6	0.9	0.3	0	0	1	0	0	0	4	2	16	0	1	2	3	0	1	1	0	0	2	2	1	0	17	0	0	0	365	1	0
1219	53	0	62	158	24.8358	0	1	0	0	0	0	0.5	0.6	0.1	0	0	0	0	0	0	1	1	13.6	1	1	2	2	0	1	1	0	70	1	0	1	0	20	0	0	0	365	0	0
1220	46	1	99	175	32.3265	1	2	0	0	0	0	0.97	1.1	0.13	0	0	0	0	0	0	1	1	16.5	1	1	2	1	1	1	2	1	35	1	0	1	0	6	0	0	0	365	0	0
1221	47	1	102	150	45.3333	1	1	0	0	0	0	0.8	1	0.2	0	0	0	0	0	0	1	1	14.5	1	1	2	2	0	1	1	0	60	1	0	2	0	8	0	0	0	365	0	0
1222	79	0					1	0	1	0	0	0.64	0.7	0.06	0	1	0	0	1	0	1	1	13.2	0	0	2	3	0	1	1	0	60	1	0	0	0	6	0	0	0	365	0	0
1223	41	1	81	170	28.0277	0	1	0	0	0	0	0.8	0.9	0.1	0	0	0	0	0	0	2	1	16.6	1	0	2	1	1	1	2	1	30	2	2	2	0	6	0	0	0	365	0	0
1224	77	0	90	156	36.9822	1	0	0	1	2	1	1.2	1.4	0.2	1	0	0	1	0	0	3	2	9.4	1	0	2	2	0	3	1	0	61	1	0	2	0	4	0	0	0	365	2	0
1225	77	1	89	177	28.4082	0	2	2	0	0	0	0.4	1.2	0.8	0	0	1	1	0	0	1	1	17	1	0	1	1	1	1	1	0	55	3	0	0	0	1	0	0	0	365	3	2
1226	55	0	80	168	28.3447	0	0	0	0	0	0	0.69	0.8	0.11	0	0	0	0	0	0	1	1	0	1	0	2	2	0	1	1	0	62	1	0	1	0	5	0	0	0	365	0	0
1227	73	1	70	165	25.7117	0	1	0	0	0	0	1.17	1.4	0.23	0	0	0	0	1	0	1	1	14	0	0	2	3	0	1	1	0	65	2	2	1	0	12	0	0	0	365	0	0
1228	62	0	77	146	36.1231	1	2	0	1	2	0	0.6	0.8	0.2	0	0	0	0	0	0	2	1	14.4	0	0	2	3	0	1	2	1	40	3	0	2	0	16	0	0	0	365	0	0
1229	57	1	80	165	29.3848	0	0	0	1	2	0	0.5	0.8	0.3	0	0	1	1	0	0	1	1	13	1	0	2	1	1	3	2	1	40	3	0	1	0	3	0	0	0	0	3	3
1230	71	1	75	166	27.2173	0	0	0	0	0	0	0.7	0.8	0.1	0	0	0	0	0	0	1	1	16.5	1	0	2	1	1	1	1	0	50	2	2	1	0	5	0	0	0	365	0	0
1231	69	1	74	163	27.852	0	1	0	0	0	0	1	1.6	0.6	0	0	1	0	0	0	1	1	168	1	0	2	1	1	1	1	0	45	2	2	2	0	9	0	0	0	365	1	0
1232	71	1	72	169	25.2092	0	1	0	0	0	1	1.1	1.2	0.1	0	0	0	0	0	0	2	2	15	0	0	2	3	0	1	1	0	62	2	2	1	0	7	0	0	0	365	0	0
1233	74	1	73	163	27.4756	0	1	0	1	2	1	1.3	1.88	0.58	1	1	1	0	0	0	1	1	11.6	0	0	2	3	0	1	1	0	75	2	2	1	0	13	0	0	0	365	1	0
1234	57	1	97	169	33.9624	1	0	0	1	0	1	1.35	1.5	0.15	1	0	0	0	0	0	4	3	14.2	0	1	2	3	0	1	1	0	60	1	0	2	0	11	0	90	1	90	0	0
1235	56	1	91	167	32.6294	1	0	0	0	0	0	0.8	0.9	0.1	0	0	0	0	0	0	1	1	14.7	1	0	2	2	0	1	1	0	0	3	0	1	0	33	0	0	0	365	0	0
1236	46	1	85	174	28.075	0	2	0	0	0	0	0.7	1.2	0.5	1	1	1	1	0	0	1	1	11.8	1	0	2	1	1	3	1	0	0	0	0	0	1	4	0	0	1	4	3	4
1237	45	1					1	0	0	0	0	0.7	1	0.3	0	0	1	0	0	0	2	2	17	0	1	2	3	0	1	1	0	0	1	0	0	0	6	0	0	0	134	1	0
1238	57	1	106	170	36.6782	1	2	2	0	0	0	0.9	1.3	0.4	0	0	1	1	0	0	1	1	14.8	1	1	2	1	1	3	1	0	56	2	2	2	0	7	0	27	1	27	3	3
1239	56	1	78	172	26.3656	0	0	0	0	0	0	0.8	0.8	0	0	0	0	0	0	0	1	1	16	0	0	2	3	0	1	1	0	65	3	0	1	0	20	0	0	1	365	0	0
1240	45	1	110	178	34.7178	1	1	0	1	2	0	0.9	1.1	0.2	0	0	0	0	0	0	4	2	14.7	0	1	2	3	0	1	0		0	0	0	0	0	1	0	0	0	365	0	0
1241	52	1	86	169	30.111	1	2	0	1	0	0	0.7	1.2	0.5	0	0	1	0	0	0	1	1	15.7	1	1	2	2	0	1	1	0	52	2	2	1	0	4	0	0	0	365	1	0
1242	68	1	67	168	23.7387	0	2	0	0	0	1	1.8	2.2	0.4	0	0	1	1	0	0	1	1	14	1	0	2	1	1	3	1	0	45	2	1	1	1	1	0	0	1	1	3	4
1243	53	1	73	163	27.4756	0	2	2	0	0	0	0.9	1.1	0.2	0	0	0	0	0	0	1	1	15	1	1	2	1	1	1	1	0	65	3	0	1	0	26	0	0	0	365	0	0
1244	77	0					0	0	0	0	0	0.6	0.7	0.1	1	0	0	0	0	0	1	1	10	1	0	2	1	1	1	2	1	30	0	0	0	0	18	0	0	0	365	0	0
1245	58	1	82	179	25.5922	0	2	0	0	0	0	0.89	1.4	0.51	0	0	1	0	0	1	1	1	16	1	1	2	1	1	1	3	1	30	2	2	1	0	7	0	0	0	365	1	0
1246	64	1	98	170	33.91	1	1	0	1	2	0	0.8	1	0.2	1	0	0	0	0	0	1	1	11.9	1	1	2	1	1	1	1	0	0	3	0	1	0	35	0	0	0	365	0	0
1247	59	1					0	0	1	0	1	1.1	1.3	0.2	0	0	0	0	0	0	1	1	16.4	1	0	2	1	1	1	2	1	30	1	0	0	0	10	0	0	0	165	0	0
1248	67	1	69	172	23.3234	0	0	0	1	0	0	1	1.1	0.1	0	0	0	0	0	0	5	1	16.4	1	1	2	2	0	1	1	0	63	2	2	2	0	7	0	0	0	365	0	0
1249	50	1	68	178	21.4619	0	2	2	1	1	0	0.6	0.9	0.3	0	0	1	0	0	0	1	1	14.4	0	0	2	3	0	1	1	0	0	2	2	1	0	7	1	0	0	365	1	0
1250	63	1					2	2	0	0	0	0.7	1	0.3	0	0	1	0	0	0	1	1	17	1	0	2	1	1	1	1	0	55	1	0	2	0	3	0	0	0	365	1	0
1251	66	1	82	173	27.3982	0	1	0	1	2	0	0.89	0.9	0.01	0	1	0	0	0	0	1	1	14	0	1	2	3	0	1	1	0	60	3	0	1	0	29	0	0	0	365	0	0
1252	46	1	79	160	30.8594	1	0	0	0	0	0	1	1.5	0.5	1	0	1	0	0	0	1	1	9.4	0	1	2	3	0	1	1	0	68	3	0	1	0	20	0	16	1	16	1	0
1253	46	1					2	0	0	0	0	0.8	1	0.2	0	0	0	0	0	0	1	1	16	1	0	2	1	1	1	1	0	55	1	0	0	0	6	0	0	0	365	0	0
1254	78	1	65	152	28.1337	0	2	0	0	2	0	0.7	1	0.3	0	0	1	0	0	0	1	1	13.9	1	0	2	1	1	1	1	0	55	2	2	2	0	9	1	0	0	365	1	0
1255	57	1	70	166	25.4028	0	2	0	1	0	0	0.8	1	0.2	0	0	0	0	0	0	1	1	14	1	1	2	1	1	1	2	1	35	2	2	1	0	8	0	0	0	365	0	0
1256	60	0	78	166	28.306	0	2	0	1	0	0	0.77	1.2	0.43	0	0	1	0	0	0	1	1	12.8	1	0	2	2	0	1	1	0	65	2	1	1	0	10	0	0	0	365	1	0
1257	71	0	84	158	33.6485	1	0	0	1	0	0	0.9	1	0.1	0	0	0	0	0	0	3	3	13.2	0	0	2	3	0	1	1	0	50	2	2	1	0	7	0	0	0	365	0	0
1258	51	1	56	167	20.0796	0	2	0	0	0	0	0.7	1	0.3	0	0	1	0	0	0	1	1	15	1	1	2	1	1	1	1	0	60	2	2	1	0	10	0	0	0	365	1	0
1259	64	1	74	173	24.7252	0	2	0	1	0	0	0.6	0.98	0.38	0	0	1	0	0	0	1	1	15	1	1	2	2	0	1	1	0	0	2	1	1	0	5	0	0	0	365	1	0
1260	66	1	80	178	25.2493	0	1	0	1	0	0	0.6	1	0.4	0	0	1	0	0	0	1	1	13.4	1	1	2	2	0	1	1	0	60	3	0	1	0	30	0	0	0	365	1	0
1261	54	1	71	159	28.0843	0	1	0	0	2	0	0.9	1.1	0.2	0	0	0	0	0	0	1	1	15.4	0	1	2	3	0	1	1	0	60	3	0	1	0	13	0	0	0	365	0	0
1262	84	1					2	0	1	0	0	1.1	1.3	0.2	0	0	0	0	0	0	1	1	16.7	1	0	2	1	1	1	2	1	37	2	2	2	0	5	0	0	0	365	0	0
1263	72	1	80	170	27.6817	0	2	0	1	2	0	0.72	1.4	0.68	0	0	1	0	0	0	1	1	14.6	1	1	2	1	1	1	1	0	45	2	2	1	0	14	0	0	0	365	1	0
1264	64	1	75	175	24.4898	0	2	1	0	0	0	0.9	1.1	0.2	0	0	0	0	1	0	1	1	13.1	1	0	2	1	1	1	1	0	55	2	2	1	0	7	0	0	0	365	0	0
1265	57	1	75	173	25.0593	0	1	0	0	0	0	0.9	1	0.1	0	0	0	0	0	0	1	1	16	0	0	2	3	0	1	1	0	55	3	0	0	0	3	0	0	0	365	0	0
1266	53	1	74	169	25.9095	0	0	0	1	2	0	0.9	1.5	0.6	0	0	1	0	0	0	1	1	18.5	1	1	2	2	0	1	2	1	35	2	2	2	0	22	0	0	0	365	1	0
1267	64	1					0	0	0	0	0	1.2	2.1	0.9	1	0	1	1	0	0	1	1	12.1	1	0	1	1	1	4	3	1	25	1	0	0	1	2	0	0	1	2	3	4
1268	70	0	90	157	36.5126	1	0	0	1	2	0	0.62	0.8	0.18	0	0	0	0	0	0	1	1	13.1	1	1	2	2	0	1	1	0	65	2	1	1	0	6	0	0	0	365	0	0
1269	48	1	80	166	29.0318	0	2	0	1	2	0	0.8	1.1	0.3	0	0	1	0	0	0	1	1	20.2	1	1	2	2	0	1	1	0	50	2	1	1	0	8	1	0	1	91	1	0
1270	46	1	72	173	24.0569	0	2	2	0	0	0	0.77	1	0.23	0	0	0	0	0	0	1	1	16.9	1	0	2	2	0	1	2	1	40	3	0	1	0	52	0	0	0	365	0	0
1271	47	1	96	179	29.9616	0	1	0	0	0	0	1	1	0	0	0	0	0	0	0	1	1	13.8	0	1	2	3	0	1	0		0	3	0	1	0	0	0	0	0	365	0	0
1272	42	1	75	175	24.4898	0	2	0	0	0	0	0.6	0.9	0.3	0	0	1	0	0	0	1	1	14.7	1	1	1	1	1	1	1	0	50	2	1	1	0	15	1	0	1	94	1	0
1273	74	1					2	0	0	0	0	0.8	1.3	0.5	0	0	1	0	0	0	1	1	16.4	1	0	2	1	1	1	1	0	50	0	0	0	0	6	0	0	0	365	1	0
1274	83	0	72	152	31.1634	1	0	0	1	0	1	0.9	1.8	0.9	0	0	1	1	0	0	1	1	14.6	0	0	2	3	0	2	1	0	45	3	0	1	0	20	0	0	0	365	3	4
1275	66	1	91	177	29.0466	0	1	2	1	0	0	0.9	1.2	0.3	0	0	0	1	0	1	1	1	13.8	1	1	2	1	1	2	2	1	30	3	0	0	0	14	1	0	1	37	2	0
1276	54	0	82	164	30.4878	1	2	0	1	2	1	5.2	6.2	1	1	1	1	0	0	0	5	1	10	0	1	2	3	0	1	1	0	50	2	0	1	0	9	0	0	0	365	1	0
1277	51	1	80	173	26.7299	0	0	0	1	0	0	0.8	1	0.2	0	0	0	0	0	0	1	1	13.8	1	0	2	2	0	1	1	0	60	1	0	1	0	34	0	0	0	365	0	0
1278	59	0	60	161	23.1473	0	1	0	1	0	0	0.5	0.7	0.2	0	0	0	0	0	0	1	1	15.8	1	0	1	1	1	1	1	0	45	3	0	0	0	26	0	0	0	365	0	0
1279	69	1	72	165	26.4463	0	2	1	1	2	0	0.6	0.8	0.2	0	0	0	0	0	0	2	1	14.3	1	0	2	2	0	1	2	1	40	3	0	1	0	43	0	0	0	365	0	0
1280	45	1	87	173	29.0688	0	2	2	0	0	0	0.6	0.8	0.2	0	0	0	0	0	0	1	1	14.7	1	0	2	2	0	1	1	0	65	2	2	1	0	7	0	0	0	365	0	0
1281	62	1	101	177	32.2385	1	1	0	1	2	0	0.94	1.3	0.36	0	0	1	0	0	0	5	1	15	0	0	2	3	0	1	2	1	35	3	0	1	0	23	0	0	0	365	1	0
1282	49	1	85	180	26.2346	0	2	0	0	0	0	0.8	1.3	0.5	0	0	1	0	0	0	1	1	15	1	1	2	1	1	1	1	0	60	2	2	1	0	6	0	0	0	365	1	0
1283	83	1	90	180	27.7778	0	1	0	1	2	0	0.8	1.1	0.3	1	0	1	1	0	0	1	1	12.4	1	1	2	2	0	3	1	0	60	3	0	1	0	7	1	0	0	365	3	3
1284	43	1	98	184	28.9461	0	2	0	0	0	0	0.9	1.1	0.2	0	0	0	0	0	0	1	1	15.7	0	1	2	3	0	1	1	0	61	2	1	1	0	5	0	0	0	365	0	0
1285	79	1	86	169	30.111	1	0	0	1	2	0	0.7	1.4	0.7	0	0	1	0	0	0	1	1	14.4	1	0	2	2	0	1	1	0	60	0	0	0	0	48	1	360	1	360	1	0
1286	73	1	75	168	26.5731	0	2	0	1	2	1	2	2.4	0.4	1	0	1	1	0	0	1	1	11.6	1	1	2	3	0	3	1	0	57	1	0	0	0	11	1	0	0	365	3	3
1287	66	1	63	164	23.4236	0	0	0	1	0	0	0.67	0.9	0.23	0	0	0	0	0	0	1	1	15.6	0	1	2	3	0	1	1	0	58	3	0	1	0	6	0	0	0	365	0	0
1288	54	1	83	173	27.7323	0	1	0	0	0	0	0.9	1.1	0.2	0	0	0	0	0	0	1	1	14.9	1	1	2	1	1	1	1	0	55	2	2	1	0	9	0	0	0	365	0	0
1289	63	1	80	160	31.25	1	0	2	0	0	0	0.6	1	0.4	0	0	1	0	0	0	1	1	14.4	1	1	1	1	1	1	1	0	60	2	2	1	0	8	0	0	0	365	1	0
1290	20	1	69	172	23.3234	0	2	2	0	0	0	0.9	1	0.1	0	0	0	0	0	0	1	1	14.5	1	0	2	1	1	1	1	0	60	1	0	1	0	7	0	0	0	365	0	0
1291	56	0	72	158	28.8415	0	0	0	1	2	0	0.5	0.6	0.1	0	0	0	0	0	0	1	1	13.9	0	1	2	3	0	1	1	0	0	2	2	1	0	4	0	0	0	365	0	0
1292	57	1	170	85	235.294	1	1	1	1	2	0	0.7	1.1	0.4	0	0	1	0	0	0	2	1	15.4	1	0	2	1	1	1	2	1	30	3	0	1	0	50	0	0	0	365	1	0
1293	60	0	72	159	28.4799	0	0	0	1	2	0	0.7	0.8	0.1	1	0	0	0	0	0	1	1	11.9	0	0	2	3	0	1	1	0	0	3	0	1	0	23	0	0	0	365	0	0
1294	71	1	76	168	26.9274	0	0	0	1	0	0	0.9	1.2	0.3	0	0	0	0	0	0	1	1	14.8	1	1	2	1	1	1	1	0	60	2	1	2	0	11	0	256	1	256	0	0
1295	71	0					0	0	1	0	0	0.8	1	0.2	0	0	0	1	0	0	1	1	15.1	1	1	2	2	0	3	1	0	75	1	0	0	0	13	1	0	0	365	2	0
1296	64	1	70	163	26.3465	0	0	0	1	0	0	0.95	1.6	0.65	1	0	1	0	0	0	5	1	11.5	0	0	2	3	0	1	1	0	0	1	0	1	0	9	0	0	0	365	1	0
1297	58	1	80	164	29.7442	0	2	2	0	0	0	0.86	1.1	0.24	1	0	0	0	0	0	1	1	11.8	1	0	2	2	0	1	1	0	45	2	1	1	0	8	0	10	1	10	0	0
1298	76	1					0	0	1	2	0	1	1.1	0.1	0	0	0	0	0	0	1	1	15.8	1	0	2	1	1	1	0		0	1	0	0	1	0	0	0	1	1	0	0
1299	77	0	62	175	20.2449	0	0	0	1	0	0	0.6	0.8	0.2	0	0	0	0	0	0	1	1	14.6	1	1	2	2	0	1	1	0	80	1	0	0	0	7	0	0	0	365	0	0
1300	72	0	76	146	35.654	1	0	0	1	2	0	0.5	1.1	0.6	1	0	1	0	0	0	1	1	11	1	1	2	1	1	1	1	0	45	3	0	1	0	36	0	0	0	365	1	0
1301	70	1	83	178	26.1962	0	1	0	1	2	0	0.7	0.9	0.2	0	0	0	0	0	0	1	1	15	1	0	2	2	0	1	1	0	65	3	0	1	0	37	0	0	0	365	0	0
1302	55	1	97	175	31.6735	1	2	0	1	0	1	5.5	7.9	2.4	1	0	1	1	0	1	1	1	11.2	1	0	2	2	0	3	1	0	65	3	0	1	0	8	0	0	0	161	3	4
1303	56	1	73	160	28.5156	0	2	0	1	2	0	0.6	0.9	0.3	0	0	1	0	0	0	1	1	15	1	0	2	2	0	1	1	0	65	2	2	1	0	7	0	0	0	365	1	0
1304	70	0	80	150	35.5556	1	1	0	0	0	0	0.9	1.2	0.3	1	0	0	0	0	0	1	1	11.8	1	0	2	1	1	1	1	0	70	3	0	1	0	1	1	0	1	153	0	0
1305	56	1	65	170	22.4913	0	2	0	0	0	0	0.7	0.8	0.1	0	0	0	0	0	0	1	1	15.2	0	1	2	3	0	1	1	0	56	2	2	1	0	2	0	0	0	365	0	0
1306	66	1	95	187	27.1669	0	2	0	1	0	0	0.7	1	0.3	0	0	1	0	0	0	1	1	14.1	0	0	2	3	0	1	1	0	60	3	0	1	0	26	0	0	0	365	1	0
1307	44	1	96	181	29.3031	0	2	0	0	0	0	0.7	1	0.3	0	0	1	0	0	0	1	1	13.9	1	0	2	1	1	1	2	1	40	3	0	0	0	13	0	0	0	365	1	0
1308	45	1	75	165	27.5482	0	2	2	0	0	0	0.7	1	0.3	0	0	1	0	0	0	1	1	13.8	1	0	2	1	1	1	1	0	60	2	1	1	0	7	0	0	0	365	1	0
1309	53	1	68	161	26.2336	0	2	2	0	0	0	0.7	1	0.3	0	0	1	0	0	0	1	1	17.7	1	0	1	2	0	1	1	0	60	2	2	2	0	7	0	0	0	365	1	0
1310	68	1	78	178	24.6181	0	2	0	1	0	0	0.9	1	0.1	1	0	0	0	0	0	1	1	12.5	1	0	2	1	1	1	1	0	45	2	2	2	0	12	0	32	1	32	0	0
1311	74	0	65	154	27.4077	0	0	0	1	0	0	1.1	1.9	0.8	1	0	1	0	0	0	1	1	11.2	1	1	2	1	1	1	2	1	30	2	2	1	0	15	0	0	0	365	1	0
1312	58	1	120	191	32.8938	1	2	0	1	2	0	0.8	1.2	0.4	0	0	1	0	0	0	1	1	16.2	1	0	1	1	1	1	1	0	55	2	1	1	0	8	0	0	0	365	1	0
1313	67	1	67	168	23.7387	0	1	0	0	0	0	0.9	1	0.1	1	0	0	0	0	0	1	1	12.9	1	1	2	2	0	1	2	1	40	2	2	1	0	7	0	0	0	365	0	0
1314	58	1	71	173	23.7228	0	1	0	1	0	0	1	1.2	0.2	0	0	0	0	0	0	3	2	15	0	0	2	3	0	1	1	0	65	1	0	2	0	7	0	0	0	365	0	0
1315	82	0					0	0	1	0	0	0.83	1.3	0.47	0	0	1	0	0	0	1	1	14.5	1	1	2	2	0	1	1	0	44	2	2	1	0	28	0	0	0	365	1	0
1316	59	1	75	180	23.1481	0	2	0	1	0	0	1.07	1.4	0.33	0	0	1	0	0	0	1	1	13.2	1	1	2	1	1	1	1	0	48	2	2	1	0	9	0	0	0	365	1	0
1317	43	1	75	169	26.2596	0	2	0	0	0	0	0.8	1.1	0.3	0	0	1	0	0	0	1	1	15.4	1	0	2	1	1	1	1	0	67	2	2	1	0	6	0	0	0	365	1	0
1318	76	1					0	0	1	2	1	2.9	3.4	0.5	1	0	1	1	0	0	2	3	10.5	1	1	1	1	1	4	3	1	0	1	0	0	1	1	0	0	1	1	3	4
1319	28	0	61	166	22.1367	0	2	0	0	0	0	0.7	1.1	0.4	0	0	1	0	0	0	1	1	14	1	1	2	1	1	1	1	0	60	1	0	0	1	15	0	0	1	15	1	0
1320	31	1	80	172	27.0416	0	2	2	0	0	0	1	1	0	0	0	0	0	0	0	1	1	17	1	0	2	2	0	1	1	0	60	1	0	0	0	4	0	40	1	40	0	0
1321	53	1	95	173	31.7418	1	2	0	0	0	1	1.44	1.9	0.46	0	0	1	1	1	0	1	1	15.4	1	1	2	1	1	3	3	1	20	2	2	1	0	9	0	0	0	365	3	4
1322	73	1	74	170	25.6055	0	1	0	1	2	0	0.57	0.9	0.33	0	0	1	1	0	0	1	1	16.9	1	0	2	1	1	2	2	1	35	2	2	2	0	21	0	0	0	365	3	3
1323	51	1	62	165	22.7732	0	2	2	0	0	0	0.9	1.2	0.3	0	0	0	0	0	0	5	1	16	1	0	2	1	1	1	1	0	45	2	2	2	0	9	0	0	0	365	0	0
1324	49	1	110	182	33.2085	1	2	0	1	0	0	1	1.1	0.1	0	0	0	1	0	0	1	1	14.5	1	1	2	1	1	2	1	0	30	3	0	1	0	48	0	0	0	365	2	0
1325	83	1	78	172	26.3656	0	0	0	1	0	0	1.1	1.42	0.32	1	0	1	0	0	0	1	1	11.7	1	1	2	2	0	1	1	0	65	3	0	0	0	26	0	0	0	365	1	0
1326	63	0	56	161	21.6041	0	0	0	1	2	0	0	0		0	0	0	0	0	0	1	1	13.1	1	1	2	2	0	1	1	0	60	3	0	1	0	33	0	0	0	365	0	0
1327	71	1	81	167	29.0437	0	2	1	1	2	0	0.8	1.1	0.3	0	0	1	0	0	0	1	1	14.3	1	1	2	1	1	1	1	0	55	3	0	1	0	28	0	0	0	365	1	0
1328	52	0	53	158	21.2306	0	2	0	0	0	0	0.72	0.8	0.08	1	0	0	0	0	0	1	1	12.4	0	0	2	3	0	1	1	0	65	3	0	1	0	14	0	0	0	365	0	0
1329	77	1					0	2	1	0	0	0.7	1	0.3	0	0	1	0	0	0	1	1	15.9	0	0	2	3	0	1	1	0	62	1	0	0	0	7	0	0	0	365	1	0
1330	61	0	70	162	26.6728	0	0	0	1	2	0	0.7	0.95	0.25	1	0	0	0	0	0	1	1	11.7	1	1	2	2	0	1	1	0	60	1	0	2	0	14	0	0	0	365	0	0
1331	51	1	118	175	38.5306	1	0	0	0	0	0	0.4	0.8	0.4	0	0	1	0	0	0	1	1	15	1	0	2	1	1	1	1	0	55	1	0	2	0	6	0	0	0	365	1	0
1332	55	1	76	166	27.5802	0	2	0	1	0	0	0.68	0.9	0.22	0	0	0	0	0	0	1	1	14.5	1	1	2	2	0	1	1	0	65	2	2	1	0	7	0	0	0	365	0	0
1333	80	0	70	163	26.3465	0	0	0	1	2	1	1.1	1.5	0.4	1	0	1	1	0	0	4	1	11.3	0	1	2	3	0	2	1	0	45	2	2	1	0	6	0	0	0	365	3	3
1334	65	1	76	164	28.257	0	1	0	1	0	0	1.07	1.5	0.43	0	0	1	0	0	0	1	1	17.3	1	0	2	1	1	1	2	1	35	2	2	1	0	14	0	0	0	365	1	0
1335	70	1	85	172	28.7317	0	1	0	0	0	0	0.9	1	0.1	1	0	0	0	0	0	1	1	12.6	1	1	2	2	0	1	1	0	55	2	2	1	0	4	0	0	0	365	0	0
1336	79	0	50	150	22.2222	0	0	0	0	0	0	1.2	1.6	0.4	0	0	1	1	0	0	1	1	13.8	1	0	2	1	1	2	2	1	35	2	0	2	1	2	0	0	1	2	3	4
1337	50	1	78	164	29.0006	0	2	0	0	2	0	0.9	1.1	0.2	0	0	0	0	0	0	1	1	13.4	1	1	2	1	1	1	2	1	40	2	2	1	0	10	0	0	0	365	0	0
1338	52	1	64	160	25	0	1	0	1	0	0	0.5	0.6	0.1	0	0	0	0	0	0	1	1	13.9	0	1	2	3	0	1	1	0	75	2	2	1	0	8	0	0	0	365	0	0
1339	53	1	83	170	28.7197	0	0	0	0	0	0	1.2	1.6	0.4	0	0	1	0	0	0	1	1	14.4	1	1	2	1	1	1	1	0	50	2	2	1	0	9	0	0	0	365	1	0
1340	50	1	98	172	33.126	1	2	0	1	0	0	1	1.1	0.1	0	0	0	0	0	0	1	1	14.9	0	0	2	3	0	1	1	0	65	3	0	1	0	51	0	0	0	0	0	0
1341	62	1	79	165	29.0174	0	1	0	0	2	0	0.6	0.84	0.24	0	0	0	0	0	0	1	1	15.3	1	1	2	2	0	1	1	0	70	2	2	1	0	7	0	0	0	365	0	0
1342	52	1	95	173	31.7418	1	1	0	0	0	0	0.69	0.8	0.11	0	0	0	0	0	0	1	1	14	1	0	2	2	0	1	1	0	69	2	2	2	0	6	0	0	0	365	0	0
1343	73	0	70	158	28.0404	0	0	0	1	2	0	1.1	3.9	2.8	1	0	1	1	0	0	1	1	6	1	0	2	1	1	4	2	1	35	1	0	0	1	9	0	0	1	9	3	4
1344	76	1	84	175	27.4286	0	0	0	1	0	1	1	1.4	0.4	0	0	1	0	0	0	1	1	13.8	1	1	2	1	1	1	2	1	35	2	2	1	0	33	0	0	0	365	1	0
1345	59	1	73	168	25.8645	0	2	0	1	0	0	1.1	1.2	0.1	0	0	0	0	0	0	1	1	13	1	1	2	2	0	1	1	0	70	2	1	2	0	7	0	0	0	365	0	0
1346	65	0	71	153	30.3302	1	0	0	0	2	0	0.6	0.85	0.25	0	0	0	0	0	0	1	1	12.9	1	0	2	1	1	1	1	0	55	2	2	1	0	10	0	0	0	365	0	0
1347	89	1	84	172	28.3937	0	1	0	1	0	0	1.2	1.5	0.3	0	0	1	0	0	0	5	1	15.6	1	0	2	1	1	1	3	1	25	2	1	1	1	4	0	0	1	4	1	0
1348	51	0	78	168	27.6361	0	2	0	1	0	0	0.7	1	0.3	0	0	1	0	0	0	1	1	12.6	0	1	2	3	0	1	1	0	65	2	1	1	0	4	0	0	0	365	1	0
1349	65	1	74	160	28.9062	0	2	2	0	0	0	0.5	0.7	0.2	0	0	0	0	0	1	2	3	16.3	1	1	1	2	0	1	2	1	30	1	0	0	0	5	1	0	1	209	0	0
1350	64	1	72	158	28.8415	0	1	0	0	0	0	0.7	0.9	0.2	0	0	0	0	0	0	1	1	15.2	1	0	2	1	1	1	1	0	60	2	2	1	0	8	0	0	0	365	0	0
1351	49	1	93	165	34.1598	1	1	0	1	2	0	1	1.3	0.3	0	0	1	0	0	0	2	1	14.5	1	1	2	1	1	1	1	0	65	2	2	2	0	7	0	0	0	365	1	0
1352	78	1	54	165	19.8347	0	0	0	0	0	0	0.8	1	0.2	1	0	0	0	0	0	1	1	12.9	1	0	2	1	1	1	2	1	30	2	2	1	0	6	0	0	0	365	0	0
1353	71	1	104	175	33.9592	1	1	0	1	0	0	0.77	0.9	0.13	0	0	0	0	0	0	1	1	14.5	1	1	2	1	1	1	1	0	55	2	1	2	0	6	0	0	0	365	0	0
1354	56	1	96	177	30.6425	1	1	0	0	0	0	1	1.2	0.2	0	0	0	0	0	0	1	1	15.3	1	0	1	1	1	1	1	0	45	2	2	1	0	4	0	0	0	365	0	0
1355	72	0	97	156	39.8586	1	0	0	1	0	0	0.7	1	0.3	0	0	1	0	0	0	1	1	12.9	1	1	2	1	1	1	1	0	55	2	1	2	0	12	0	0	0	365	1	0
1356	64	1					1	0	0	0	0	0.8	1.2	0.4	0	0	1	0	0	0	1	1	15	1	1	2	1	1	1	1	0	60	1	0	0	0	9	0	0	0	365	1	0
1357	66	1	79	177	25.2163	0	0	0	1	0	0	0.6	0.9	0.3	1	0	1	0	0	0	1	1	11.8	1	0	2	1	1	1	1	0	55	3	0	1	0	26	0	0	0	365	1	0
1358	56	1	85	177	27.1314	0	1	0	0	0	0	0.8	1	0.2	0	0	0	0	0	0	1	1	15.8	0	1	2	3	0	1	1	0	60	3	0	1	0	16	0	0	0	365	0	0
1359	36	1	62	170	21.4533	0	2	0	0	0	0	0.8	1.1	0.3	0	0	1	0	0	0	1	1	13.2	1	0	2	1	1	1	1	0	65	2	2	1	0	11	0	0	0	365	1	0
1360	48	1	85	174	28.075	0	2	2	0	0	0	0.7	0.9	0.2	0	0	0	0	0	0	1	1	16	0	1	2	1	1	1	1	0	0	2	1	1	0	10	0	0	0	365	0	0
1361	76	0	57	150	25.3333	0	1	0	0	0	0	0.6	0.8	0.2	1	0	0	0	0	0	1	1	11.9	1	1	2	1	1	1	1	0	60	2	1	1	0	12	0	0	0	365	0	0
1362	39	0	93	163	35.0032	1	2	0	1	0	0	0.59	0.63	0.04	0	0	0	1	0	0	1	1	0	1	0	0	2	0	2	1	0	55	1	0	1	0	7	0	333	1	333	2	0
1363	57	1	76	163	28.6048	0	2	0	0	0	0	0.7	0.9	0.2	0	0	0	0	0	0	1	1	14.1	1	0	2	1	1	1	1	0	50	2	1	1	0	6	0	0	0	365	0	0
1364	62	0	67	154	28.251	0	2	0	1	0	0	0.8	1	0.2	0	0	0	0	0	0	1	1	12.6	1	1	2	1	1	1	1	0	0	1	0	2	0	25	0	0	0	365	0	0
1365	78	1	80	165	29.3848	0	0	0	1	0	0	1	1.5	0.5	0	0	1	0	0	0	1	1	13.8	1	1	1	1	1	1	1	0	65	2	1	1	0	11	0	0	0	365	1	0
1366	45	1	78	174	25.763	0	2	0	0	0	0	0.7	1	0.3	0	0	1	0	0	0	1	1	15.7	0	1	2	3	0	1	1	0	0	3	0	1	0	15	0	0	0	365	1	0
1367	60	1	87	177	27.7698	0	1	0	1	0	0	0.7	1	0.3	0	0	1	0	0	0	1	1	17	1	0	2	1	1	1	1	0	45	2	2	2	0	7	0	0	0	365	1	0
1368	64	0					2	0	1	2	0	0.6	1.9	1.3	0	0	1	0	0	0	5	0	12	1	0	2	1	1	1	1	0	50	1	0	2	1	2	0	0	1	2	1	0
1369	62	1	80	170	27.6817	0	1	2	1	0	0	0.8	1.1	0.3	1	1	1	1	0	0	1	1	10.3	1	0	1	1	1	4	3	1	30	2	2	2	1	1	0		1	1	3	3
1370	46	1					2	0	0	0	0	0.6	0.9	0.3	0	0	1	0	0	0	1	1	14.7	1	0	2	1	1	1	1	0	55	1	0	0	0	8	0	0	0	365	1	0
1371	57	1	87	171	29.7527	0	2	0	0	0	0	0.7	0.9	0.2	0	0	0	0	0	0	1	1	13.4	1	0	2	1	1	1	1	0	64	1	0	0	0	12	0	0	0	365	0	0
1372	47	1	80	170	27.6817	0	2	0	0	0	0	0.7	0.95	0.25	0	0	0	0	0	0	1	1	14.3	1	1	2	1	1	1	1	0	65	1	0	0	0	6	0	0	0	365	0	0
1373	69	1	78	174	25.763	0	1	0	0	0	0	0.8	1.1	0.3	0	0	1	0	0	0	1	1	15	1	0	2	1	1	1	1	0	55	2	0	2	0	11	0	0	0	365	1	0
1374	66	1					1	0	1	2	0	0.8	1	0.2	0	0	0	0	1	0	1	1	13.9	1	1	2	1	1	1	1	0	50	2	2	1	0	8	0	0	0	365	0	0
1375	44	1	74	163	27.852	0	0	0	0	0	0	0.8	1	0.2	0	0	0	0	0	0	1	1	15	1	1	2	2	0	1	1	0	60	1	0	1	0	5	0	0	0	365	0	0
1376	76	1	79	167	28.3266	0	0	0	0	2	0	1.1	2.5	1.4	0	0	1	1	0	0	1	1	12.7	1	0	2	2	0	3	1	0	55	3	0	1	0	51	0	0	0	365	3	4
1377	55	1	118	175	38.5306	1	2	0	1	0	1	1.65	1.7	0.05	0	0	0	0	0	0	1	1	17	0	1	2	3	0	1	1	0	57	3	0	1	0	5	0	0	0	365	0	0
1378	57	1	82	170	28.3737	0	2	0	1	0	0	0.93	1.3	0.37	0	0	1	0	0	0	1	1	15.1	1	1	2	1	1	1	2	1	35	2	2	1	0	8	0	0	0	365	1	0
1379	47	1	85	167	30.478	1	0	0	0	0	0	0.8	0.87	0.07	0	1	0	0	0	0	1	1	15.6	1	1	2	2	0	1	1	0	69	0	0	0	0	4	0	0	0	365	0	0
1380	67	0	86	146	40.3453	1	0	0	1	2	0	0.78	1.1	0.32	1	1	1	0	0	0	4	3	11.7	1	1	2	3	0	1	1	0	70	2	2	2	0	7	0	0	0	365	1	0
1381	52	1	89	165	32.6905	1	2	2	1	0	0	1	1.3	0.3	0	0	1	0	0	0	1	1	13.8	1	0	2	2	0	1	1	0	45	3	0	1	0	40	0	0	0	365	1	0
1382	46	0	89	160	34.7656	1	0	0	0	0	0	0.6	1	0.4	0	0	1	0	0	0	1	1	14.4	0	1	2	3	0	1	1	0	67	3	0	1	0	35	0	0	0	365	1	0
1383	79	1	96	183	28.6661	0	0	0	1	0	0	1	1.1	0.1	0	0	0	0	0	0	1	1	14.9	1	0	2	1	1	1	1	0	50	3	0	1	0	41	0	0	0	365	0	0
1384	73	0	75	151	32.8933	1	0	0	0	2	0	0.7	1	0.3	1	0	1	1	0	0	1	1	12.5	1	1	2	1	1	2	1	0	55	2	2	2	0	26	0	0	0	365	3	3
1385	79	0	70	157	28.3987	0	0	0	0	0	0	0.8	1.1	0.3	0	0	1	1	0	0	1	1	13.5	1	0	2	2	0	3	1	0	65	1	0	1	0	13	0	0	0	365	3	3
1386	50	0	70	165	25.7117	0	0	0	1	2	0	0.7	1.1	0.4	1	0	1	0	0	0	1	1	11.3	1	1	2	2	0	1	1	0	70	2	1	1	0	7	0	0	0	365	1	0
1387	55	1	73	168	25.8645	0	0	0	1	0	0	0.93	1.3	0.37	1	0	1	0	0	0	1	1	12.6	1	0	2	2	0	1	1	0	60	2	2	1	0	7	0	0	0	365	1	0
1388	53	1	60	165	22.0386	0	0	0	0	2	0	0.7	1	0.3	0	0	1	0	0	0	1	1	14.5	1	1	2	1	1	1	1	0	45	2	2	2	0	13	0	0	0	365	1	0
1389	63	1	120	177	38.3032	1	0	0	1	2	0	1.03	1.7	0.67	0	0	1	0	0	0	1	1	13.3	1	1	2	1	1	1	2	1	35	2	2	2	0	10	0	0	0	365	1	0
1390	62	1	67	163	25.2174	0	0	0	1	2	0	0.7	1.3	0.6	0	0	1	0	0	0	1	1	16.3	0	1	2	3	0	1	1	0	0	3	0	0	0	9	0	0	0	365	1	0
1391	64	1	73	169	25.5593	0	2	2	0	0	0	0.7	0.8	0.1	1	0	0	0	0	0	1	1	9.5	1	0	2	1	1	1	1	0	0	2	1	1	0	12	0	0	0	365	0	0
1392	64	1	84	178	26.5118	0	1	2	1	0	0	0.96	1.2	0.24	0	0	0	0	0	0	1	1	13.4	1	0	2	1	1	1	1	0	68	2	2	1	0	5	0	0	0	365	0	0
1393	54	1	80	170	27.6817	0	2	0	0	2	1	1.64	2	0.36	0	0	1	0	0	0	1	1	14.9	1	0	2	1	1	1	2	1	30	3	0	1	0	25	0	0	0	365	1	0
1394	52	1	84	178	26.5118	0	2	0	0	0	0	1	1.3	0.3	0	0	1	0	0	0	1	1	16.9	1	0	2	2	0	1	1	0	65	3	0	1	0	8	0	0	0	365	1	0
1395	60	1	78	168	27.6361	0	1	0	0	2	0	0.8	1.1	0.3	0	0	1	0	0	0	1	1	15.5	1	1	2	1	1	1	1	0	45	2	2	1	0	7	0	0	0	365	1	0
1396	80	0	80	168	28.3447	0	0	0	1	2	0	0.8	1.1	0.3	0	0	1	1	0	0	1	1	12.2	1	1	2	2	0	1	2	1	35	2	1	1	0	7	0	0	0	365	3	1
1397	48	1	88	172	29.7458	0	1	1	1	0	0	0.9	1.2	0.3	0	0	0	0	0	0	1	1	14	1	1	2	1	1	1	1	0	65	2	2	1	0	10	0	0	0	365	0	0
1398	79	1	85	164	31.6032	1	1	0	1	0	1	1	1.6	0.6	0	0	1	0	0	0	1	1	16.9	1	0	2	1	1	1	1	0	55	2	2	1	0	8	0	0	0	365	1	0
1399	67	1	184	84	260.771	1	2	0	1	0	0	1	1.2	0.2	0	0	0	0	0	0	1	1	14.6	1	1	1	2	0	1	1	0	57	3	0	1	0	30	0	0	0	365	0	0
1400	59	1	85	160	33.2031	1	1	0	0	0	0	0.8	1.1	0.3	0	0	1	0	0	0	1	1	16.3	1	1	2	1	1	1	1	0	45	2	2	1	0	9	0	0	0	365	1	0
1401	78	1	77	176	24.858	0	0	0	0	0	0	1	1.2	0.2	0	0	0	0	0	0	1	1	14.4	1	0	2	1	1	1	2	1	30	2	2	2	0	9	0	0	0	365	0	0
1402	46	0	157	68	339.533	1	2	0	0	0	0	0.49	0.6	0.11	0	0	0	0	0	0	1	1	14	1	0	2	1	1	1	1	0	65	2	2	1	0	6	0	0	0	365	0	0
1403	54	1	70	175	22.8571	0	1	0	0	0	0	0.98	1	0.02	0	0	0	0	0	0	1	1	15.1	0	0	2	3	0	1	1	0	0	2	0	1	0	5	0	0	0	365	0	0
1404	80	1					1	0	1	0	0	1.02	1.2	0.18	0	0	0	0	0	0	1	1	13.4	0	0	2	3	0	1	1	0	0	1	0	0	0	10	0	0	0	365	0	0
1405	41	1	78	167	27.968	0	2	0	0	0	0	0.6	0.8	0.2	0	0	0	0	0	0	1	1	16	1	1	1	1	1	1	2	1	35	2	2	1	0	7	0	0	0	365	0	0
1406	56	1	91	170	31.4879	1	2	0	1	0	0	1.1	1.7	0.6	0	0	1	0	0	0	1	1	16.6	1	0	2	2	0	1	1	0	45	2	2	1	0	12	0	0	0	365	1	0
1407	55	0	76	158	30.4438	1	0	0	1	0	0	0.7	0.9	0.2	0	0	0	0	0	0	1	1	14.6	1	1	2	3	0	1	1	0	67	1	0	0	0	5	0	0	0	365	0	0
1408	62	1	85	170	29.4118	0	0	0	0	0	0	1	1.1	0.1	0	0	0	0	0	0	1	1	14.5	1	0	1	2	0	1	1	0	60	2	2	1	0	7	1	0	0	365	0	0
1409	64	1	102	172	34.4781	1	1	0	1	0	0	0.7	1.1	0.4	0	0	1	0	1	0	1	1	14	0	0	2	3	0	1	1	0	60	3	0	2	0	5	0	0	0	365	1	0
1410	58	1	73	157	29.6158	0	2	2	0	2	0	0.7	1	0.3	0	0	1	0	0	0	2	2	14	1	0	2	2	0	1	1	0	55	2	1	2	0	8	0	0	0	365	1	0
1411	45	1	59	171	20.1771	0	2	0	0	0	0	0.8	0.91	0.11	0	0	0	0	0	0	1	1	16	1	0	2	1	1	1	1	0	50	2	2	1	0	5	0	0	0	365	0	0
1412	68	1	62	154	26.1427	0	0	0	1	0	0	0.8	0.91	0.11	0	0	0	0	0	0	5	2	16.3	0	1	2	3	0	1	0		0	2	2	1	0	9	0	35	1	35	0	0
1413	55	1	87	173	29.0688	0	1	0	1	0	0	0.7	1.01	0.31	0	0	1	0	0	0	1	1	14.4	1	0	2	1	1	1	1	0	50	1	0	0	0	26	0	0	0	365	1	0
1414	75	0					0	0	1	0	1	1.35	1.5	0.15	1	0	0	0	0	0	4	1	11.9	0	1	2	3	0	1	1	0	55	3	0	2	0	4	1	0	1	101	0	0
1415	47	1	115	175	37.551	1	2	0	1	0	0	0.7	1.2	0.5	1	0	1	0	0	0	1	1	12.6	1	0	2	1	1	1	1	0	55	2	1	1	0	8	0	0	0	365	1	0
1416	55	1	90	161	34.7209	1	0	0	1	0	0	0.84	0.88	0.04	0	0	0	0	0	0	1	1	15	0	1	2	3	0	1	1	0	60	3	0	0	0	51	0	0	0	365	0	0
1417	30	1	108	172	36.5062	1	2	0	1	2	0	0.6	0.8	0.2	0	0	0	0	0	0	1	1	16.7	1	0	2	2	0	1	1	0	61	1	0	0	0	6	0	0	0	365	0	0
1418	66	1	59	171	20.1771	0	2	0	0	2	0	0.7	0.8	0.1	0	0	0	0	0	0	1	1	15	0	0	2	3	0	1	2	1	30	3	0	1	0	23	0	0	0	365	0	0
1419	52	1	85	180	26.2346	0	2	0	0	2	0	0.69	0.9	0.21	0	0	0	0	0	0	1	1	15.3	1	0	2	1	1	1	2	1	30	2	2	1	0	12	0	256	1	256	0	0
1420	76	1	83	173	27.7323	0	0	0	1	0	1	1.26	1.7	0.44	0	0	1	0	0	0	4	3	15.2	0	1	2	3	0	1	1	0	65	3	0	1	0	25	0	0	0	365	1	0
1421	41	1	74	168	26.2188	0	2	0	0	0	0	0.9	1	0.1	0	0	0	0	0	0	1	1	15.6	1	1	2	1	1	1	1	0	65	2	2	2	0	5	0	0	0	365	0	0
1422	48	1	99	172	33.464	1	2	0	1	2	1	1.13	1.5	0.37	1	0	1	0	0	0	1	1	12.6	0	1	2	3	0	1	1	0	55	1	0	2	0	6	0	0	0	365	1	0
1423	59	1	91	181	27.7769	0	1	0	0	0	0	0.7	0.9	0.2	0	0	0	0	0	0	1	1	14.4	1	0	2	1	1	1	1	0	60	2	2	1	0	6	0	0	0	365	0	0
1424	62	1	80	175	26.1224	0	1	1	1	0	0	1	1.2	0.2	0	0	0	0	0	0	1	1	15.7	1	0	2	1	1	1	2	1	40	2	1	1	0	10	0	0	0	365	0	0
1425	66	0	67	162	25.5296	0	2	0	1	0	0	0.8	0.8	0	0	0	0	0	0	0	1	1	13.7	1	1	2	1	1	1	1	0	60	2	2	1	0	11	0	0	0	365	0	0
1426	77	1	70	155	29.1363	0	0	0	1	0	0	0.9	1	0.1	0	0	0	0	0	0	1	1	16.7	1	0	2	1	1	1	1	0	45	2	2	2	0	13	0	0	0	365	0	0
1427	76	0	50	150	22.2222	0	0	0	0	2	0	0.6	0.9	0.3	0	0	1	0	0	0	2	1	12.4	0	1	1	3	0	1	1	0	45	3	0	0	0	7	1	0	0	365	1	0
1428	54	1	67	168	23.7387	0	2	0	0	0	0	0	0		1	0	0	0	0	0	1	1	11.1	1	0	2	1	1	1	1	0	65	2	1	1	0	16	0	0	0	365	0	0
1429	57	1	59	154	24.8777	0	0	0	0	0	0	0.74	1	0.26	1	0	0	0	0	0	1	1	12	1	0	2	1	1	1	1	0	55	3	0	1	0	22	0	0	0	365	0	0
1430	69	1					0	0	0	2	0	0.6	0.8	0.2	0	0	0	0	0	0	1	1	13.4	0	0	2	1	1	1	0		0	0	0	0	1	3	0	0	1	3	0	0
1431	44	1	84	179	26.2164	0	2	2	0	0	0	0.8	1.3	0.5	0	0	1	0	0	0	1	1	16	1	0	1	2	0	1	1	0	55	2	2	1	0	9	0	0	0	365	1	0
1432	84	1	82	167	29.4023	0	1	0	1	0	0	0.8	1.2	0.4	0	0	1	0	0	0	1	1	16	1	0	2	2	0	1	0		0	1	0	0	0	7	1	35	1	35	1	0
1433	55	1	105	163	39.5197	1	2	0	1	2	0	0.8	1.1	0.3	0	0	1	0	0	0	1	1	17.9	1	1	2	1	1	1	1	0	55	2	1	1	0	9	0	0	0	365	1	0
1434	48	1	69	159	27.2932	0	2	2	1	0	0	0.8	1.3	0.5	0	0	1	0	0	0	1	1	15.9	1	0	2	1	1	1	1	0	45	2	2	1	0	11	0	0	0	365	1	0
1435	86	1	67	157	27.1816	0	2	0	1	2	0	0.9	1.1	0.2	0	0	0	0	0	0	1	1	14.8	1	1	1	1	1	1	1	0	65	2	1	1	0	20	0	42	1	42	0	0
1436	57	1	90	167	32.2708	1	2	0	1	0	0	0.8	1.1	0.3	0	0	1	0	0	0	1	1	15.6	1	1	2	1	1	1	1	0	45	2	2	1	0	9	0	0	0	365	1	0
1437	61	1	82	165	30.1194	1	1	0	0	0	0	0.88	1.6	0.72	0	0	1	0	1	0	3	2	15	0	0	2	3	0	1	3	1	20	3	0	1	0	30	0	0	0	365	1	0
1438	59	0	104	163	39.1434	1	0	0	1	2	0	0.82	1.4	0.58	0	0	1	0	0	0	1	1	13	0	1	2	3	0	1	1	0	65	1	0	0	0	4	0	0	0	365	1	0
1439	64	0	63	138	33.0813	1	0	0	1	0	0	0.53	0.6	0.07	1	0	0	0	0	0	1	1	11.8	1	1	2	1	1	1	1	0	0	3	0	2	0	14	0	0	0	365	0	0
1440	67	1	80	175	26.1224	0	2	0	1	2	0	1.4	1.9	0.5	1	0	1	1	0	0	1	1	12.4	1	1	2	2	0	3	2	1	35	2	1	2	0	12	0	0	0	365	3	4
1441	48	1	84	178	26.5118	0	2	2	1	0	0	0.9	1.3	0.4	0	0	1	0	0	0	1	1	13.3	1	1	2	1	1	1	2	1	35	2	2	1	0	10	0	0	0	365	1	0
1442	53	1	94	176	30.3461	1	2	0	1	0	0	0.5	1.2	0.7	0	0	1	0	0	0	1	1	16.1	1	0	1	1	1	1	2	1	40	2	2	1	0	8	1	0	0	365	1	0
1443	50	0	59	156	24.2439	0	2	0	1	0	0	0.6	0.8	0.2	1	0	0	0	0	0	1	1	11.6	1	0	2	2	0	1	1	0	65	1	0	1	0	9	0	0	0	365	0	0
1444	42	1	69	178	21.7776	0	2	2	0	0	0	0.7	0.8	0.1	0	0	0	0	0	0	1	1	14.9	1	0	2	2	0	1	1	0	56	1	0	0	0	9	0	0	0	365	0	0
1445	63	1					2	0	0	0	0	0.94	1.4	0.46	0	0	1	0	0	0	1	1	13	1	0	2	2	0	1	2	1	40	1	0	0	0	11	1	0	0	365	1	0
1446	84	1	91	170	31.4879	1	0	0	0	0	0	1.1	1.4	0.3	0	0	0	0	0	0	1	1	13	1	0	2	2	0	1	1	0	62	2	2	1	0	11	0	30	1	30	0	0
1447	45	1	79	164	29.3724	0	2	0	0	0	0	0.7	0.9	0.2	0	0	0	0	0	0	1	1	13.5	1	0	2	2	0	1	1	0	65	2	1	1	0	7	0	0	0	365	0	0
1448	78	1					2	0	0	2	0	0.6	0.8	0.2	0	1	0	0	0	0	1	1	14.6	1	0	2	1	1	1	1	0	45	1	0	0	0	7	0	0	0	365	0	0
1449	46	1	85	185	24.8356	0	2	0	0	0	0	0.7	1	0.3	0	0	1	0	0	0	1	1	14.8	1	0	2	2	0	1	1	0	0	2	2	2	0	4	0	0	0	365	1	0
1450	51	1	89	180	27.4691	0	2	2	1	0	0	0.7	0.93	0.23	0	0	0	0	0	0	1	1	15	1	1	2	1	1	1	1	0	60	2	1	1	0	6	0	0	0	365	0	0
1451	39	1	97	178	30.6148	1	2	2	0	0	0	0.9	1	0.1	0	0	0	0	0	0	1	1	15.6	1	0	2	2	0	1	1	0	65	2	1	1	0	1	0	0	0	365	0	0
1452	73	1	90	180	27.7778	0	1	0	0	0	0	1.1	1.4	0.3	0	0	0	1	0	0	4	2	15	1	0	2	1	1	2	2	1	35	2	2	1	1	8	0	0	1	8	2	0
1453	60	1	62	163	23.3355	0	2	0	0	2	0	1.01	1.3	0.29	0	0	0	1	0	0	1	1	14	1	0	2	1	1	3	3	1	30	3	0	1	0	14	0	0	0	365	2	0
1454	37	1	89	168	31.5334	1	2	0	0	0	0	0.7	0.9	0.2	0	0	0	0	0	0	1	1	13	1	1	2	1	1	1	1	0	65	2	2	1	0	10	0	0	0	365	0	0
1455	48	1	70	172	23.6614	0	2	0	1	0	0	0.7	1	0.3	0	0	1	0	0	0	1	1	15.6	0	0	2	3	0	1	0		0	2	2	1	0	2	0	0	0	365	1	0
1456	36	1					2	0	0	0	0	0.7	0.8	0.1	0	0	0	0	0	0	1	1	15	1	0	2	1	1	1	1	0	60	2	1	1	0	6	0	0	0	171	0	0
1457	77	0	70	156	28.764	0	0	0	1	2	0	0.5	0.74	0.24	0	0	0	0	0	0	1	1	15	1	0	2	1	1	1	1	0	76	0	0	0	0	5	1	0	0	365	0	0
1458	62	1	72	182	21.7365	0	1	0	0	0	0	0.88	1	0.12	1	0	0	0	0	0	1	1	12.6	1	0	2	1	1	1	2	1	30	2	2	1	0	10	0	0	0	365	0	0
1459	51	1	90	176	29.0548	0	2	0	1	0	0	1	1	0	0	0	0	0	0	0	3	2	17.3	0	1	2	3	0	4	1	0	60	2	2	2	0	2	0	0	0	365	0	0
1460	71	1	98	174	32.3689	1	1	0	1	2	1	1.6	2.5	0.9	0	0	1	0	0	1	1	1	17.2	1	1	1	1	1	1	1	0	50	2	1	2	0	15	0	7	1	7	1	0
1461	56	1	91	173	30.4053	1	2	0	0	2	0	0.7	0.8	0.1	0	0	0	0	0	0	1	1	15.5	0	1	1	3	0	1	1	0	60	3	0	1	0	21	0	0	0	365	0	0
1462	78	0	80	168	28.3447	0	0	0	1	2	0	0.99	2.9	1.91	0	1	1	0	0	0	4	1	12.6	0	0	1	3	0	1	2	1	35	3	0	0	0	1	1	4	1	4	1	0
1463	60	1	73	164	27.1416	0	0	0	0	0	0	0.9	1.24	0.34	1	0	1	0	0	0	1	1	12.8	0	1	2	3	0	1	1	0	65	2	2	1	0	17	0	321	1	321	1	0
1464	70	1					0	0	1	0	0	1.14	1.2	0.06	0	0	0	0	0	0	1	1	14	0	0	2	3	0	1	1	0	65	1	0	0	0	3	0	0	0	365	0	0
1465	82	1	80	175	26.1224	0	0	0	1	2	0	0.9	1.4	0.5	1	0	1	0	0	1	1	1	11.2	1	1	1	1	1	1	2	1	40	2	2	2	0	17	1	0	0	365	1	0
1466	75	1					0	0	0	0	0	1.22	1.6	0.38	0	0	1	0	0	0	1	1	13.1	1	0	2	1	1	1	2	1	30	2	2	1	0	14	0	0	0	365	1	0
1467	60	1	95	174	31.378	1	1	0	1	2	0	0.9	1.1	0.2	1	0	0	0	0	0	5	1	12.7	0	1	2	3	0	1	1	0	65	2	1	1	0	3	0	0	0	365	0	0
1468	63	0	77	155	32.0499	1	0	0	1	2	0	0.6	0.8	0.2	0	0	0	0	0	1	1	1	13	1	1	2	2	0	1	1	0	80	2	2	1	0	7	0	0	0	365	0	0
1469	86	0					0	0	1	0	0	0.4	0.6	0.2	1	0	0	1	0	0	1	1	11.3	1	1	2	1	1	2	1	0	50	1	0	0	0	17	1	0	0	365	2	0
1470	64	1	62	180	19.1358	0	2	0	0	0	0	0.7	0.9	0.2	0	1	0	0	1	0	1	1	13.5	1	1	2	2	0	1	1	0	60	2	2	2	0	8	0	0	0	365	0	0
1471	49	1	80	177	25.5354	0	0	0	0	0	0	1.1	3	1.9	0	0	1	1	0	0	1	1	14.3	1	1	2	1	1	4	3	1	0	1	0	0	1	3	0	0	1	3	3	4
1472	57	1	78	168	27.6361	0	2	0	1	0	0	1	1.4	0.4	0	0	1	0	0	0	2	1	15	1	0	2	1	1	1	1	0	60	2	2	1	0	23	0	0	0	0	1	0
1473	59	1	90	175	29.3878	0	1	2	0	2	0	0.9	1.6	0.7	0	0	1	1	0	0	1	1	17.2	1	0	2	1	1	3	2	1	30	2	2	1	0	18	0	0	0	365	3	4
1474	82	1					1	0	0	0	0	1.1	1.1	0	0	0	0	1	0	0	1	1	16.8	1	0	2	1	1	4	0		0	1	0	0	1	0	0	0	1	1	2	0
1475	59	0					0	0	1	2	0	0.6	0.8	0.2	1	0	0	0	0	0	1	1	10	1	0	2	1	1	1	2	1	30	1	0	0	1	9	0	0	1	9	0	0
1476	60	1	92	164	34.2058	1	2	0	1	0	0	0.8	0.96	0.16	1	0	0	0	0	0	1	1	11.8	1	1	1	1	1	1	1	0	55	2	2	1	0	8	1	0	1	75	0	0
1477	70	1	69	169	24.1588	0	0	0	1	2	0	0.8	1.3	0.5	0	0	1	0	0	0	1	1	13.6	1	0	2	1	1	1	1	0	60	1	0	1	0	3	0	0	0	365	1	0
1478	65	1	60	165	22.0386	0	2	0	0	0	0	0.9	1.4	0.5	1	0	1	1	0	0	1	1	10.8	1	0	1	1	1	4	3	1	25	2	2	1	0	28	0	0	0	365	3	4
1479	62	1	87	171	29.7527	0	1	0	1	0	0	0.7	0.9	0.2	0	1	0	0	0	0	1	1	15	1	0	2	2	0	1	1	0	0	3	0	1	0	43	0	0	0	365	0	0
1480	48	1	89	175	29.0612	0	2	2	1	0	1	0.8	1.2	0.4	0	0	1	0	0	0	1	1	15.4	1	0	2	2	0	1	1	0	0	0	0	0	0	13	0	0	0	365	1	0
1481	49	1	96	178	30.2992	1	0	0	1	2	0	0.8	1	0.2	0	0	0	0	0	0	1	1	14.4	1	1	2	1	1	1	1	0	60	1	0	0	0	9	0	311	1	311	0	0
1482	66	1					0	0	1	2	0	1.2	3.3	2.1	1	0	1	1	0	0	3	0	11.8	1	1	1	2	0	3	1	0	45	1	0	0	1	5	0	0	0	5	3	4
1483	60	1	92	178	29.0367	0	0	0	0	0	0	0.9	1.1	0.2	0	0	0	0	0	0	1	1	15.2	1	0	2	1	1	1	1	0	55	2	1	2	0	7	0	0	0	365	0	0
1484	78	0	63	157	25.5588	0	0	0	0	0	0	0.9	1	0.1	1	0	0	0	0	0	1	1	9.9	1	0	2	1	1	1	1	0	44	2	1	2	0	29	0	0	0	365	0	0
1485	71	1					0	0	0	0	0	0.8	1.9	1.1	1	0	1	1	0	0	1	1	12.6	1	0	2	1	1	4	1	0	45	1	0	0	1	3	0	0	1	3	3	4
1486	51	1	82	168	29.0533	0	2	0	0	0	0	1.1	1.1	0	0	0	0	0	0	0	1	1	15.3	1	0	2	2	0	1	1	0	50	1	0	1	0	2	0	0	0	365	0	0
1487	74	1	95	175	31.0204	1	2	0	1	0	0	1	1.8	0.8	0	0	1	0	0	0	1	1	15	0	0	2	3	0	1	1	0	61	2	2	1	0	2	0	0	0	365	1	0
1488	73	0	52	137	27.7053	0	0	0	1	2	0	0.6	0.8	0.2	1	0	0	1	0	0	1	1	11	1	1	2	2	0	3	2	1	30	2	2	1	0	5	0	320	1	320	2	0
1489	70	0					2	0	0	0	0	0.5	0.8	0.3	0	0	1	0	0	0	1	1	13.1	1	0	2	1	1	1	1	0	55	1	0	0	0	8	0	0	0	365	1	0
1490	68	1	77	170	26.6436	0	0	0	1	0	0	1.2	1.6	0.4	0	0	1	0	0	0	1	1	13.8	1	0	2	1	1	1	2	1	35	2	2	1	0	9	0	0	0	365	1	0
1491	59	1					2	2	1	0	0	0.5	0.86	0.36	0	0	1	0	0	0	1	1	15.4	1	0	2	2	0	1	1	0	55	1	0	0	0	9	0	0	0	365	1	0
1492	69	0	97	165	35.629	1	0	0	1	2	0	0.8	1.1	0.3	0	0	1	0	0	0	1	1	12.7	0	0	2	3	0	1	1	0	60	1	0	0	0	5	0	0	0	365	1	0
1493	54	1	105	184	31.0137	1	1	0	0	0	0	1	1.2	0.2	0	0	0	0	0	0	1	1	14.5	1	1	1	1	1	1	1	0	60	2	1	1	0	18	0	0	0	365	0	0
1494	84	1	85	170	29.4118	0	0	0	0	0	0	0.9	1.7	0.8	0	0	1	1	0	0	1	1	14.4	1	0	2	1	1	3	2	1	35	2	2	2	0	29	0	0	0	365	3	4
1495	72	1	70	176	22.5981	0	0	0	0	0	0	0.8	1.3	0.5	0	0	1	0	0	0	1	1	13.7	1	1	2	2	0	1	0		0	1	0	2	1	8	0	0	1	8	1	0
1496	67	1	87	178	27.4587	0	1	0	0	0	0	0.8	1.1	0.3	0	0	1	0	0	0	1	1	15.2	1	0	2	2	0	1	1	0	65	2	1	1	0	6	0	0	0	365	1	0
1497	81	0	60	157	24.3418	0	0	0	1	0	0	0.78	1.1	0.32	1	0	1	0	0	0	1	1	10	0	0	2	3	0	1	1	0	0	2	2	1	0	5	0	0	0	365	1	0
1498	85	1					0	0	1	0	0	0.9	1	0.1	0	0	0	0	1		1	1	16.2	1	0	2	2	0	1	1	0	0	1	0	0	0	8	0	0	0	365	0	0
1499	51	1	94	180	29.0123	0	1	0	0	0	0	0.8	1.2	0.4	0	0	1	0	0	0	1	1	15.7	1	0	1	1	1	1	2	1	35	2	1	1	0	11	0	0	0	365	1	0
1500	52	1	84	174	27.7447	0	2	0	0	0	0	0.7	0.9	0.2	1	0	0	0	0	0	1	1	12.1	1	0	2	1	1	1	1	0	45	2	1	2	0	8	0	0	0	365	0	0
1501	34	1	75	172	25.3515	0	2	0	0	0	0	0.7	1.2	0.5	0	0	1	0	0	0	1	1	15	1	1	2	1	1	1	1	0	55	2	2	1	0	9	0	0	0	365	1	0
1502	47	1	75	176	24.2123	0	2	2	0	0	0	0.6	0.8	0.2	0	0	0	0	0	0	1	1	14.6	1	1	1	1	1	1	1	0	50	2	2	1	0	12	0	0	0	365	0	0
1503	52	1	90	166	32.6608	1	1	0	0	0	0	0.96	1.9	0.94	1	0	1	1	0	0	1	1	11.8	1	0	2	1	1	4	2	1	35	3	0	2	0	37	0	0	0	365	3	4
1504	55	0					1	0	1	0	0	0.6	0.66	0.06	0	0	0	0	0	0	1	1	14.7	0	0	2	3	0	1	1	0	65	1	0	0	0	3	0	0	0	365	0	0
1505	67	0	79	173	26.3958	0	0	0	0	2	0	0.7	0.9	0.2	0	0	0	0	0	0	1	1	14.8	1	1	2	1	1	1	1	0	65	2	0	1	0	7	0	0	0	365	0	0
1506	68	1	70	162	26.6728	0	0	0	1	0	0	0.7	0.9	0.2	0	0	0	0	0	1	1	1	14.6	0	1	1	3	0	1	1	0	50	2	2	2	0	6	0	0	0	365	0	0
1507	53	1	84	162	32.0073	1	2	0	0	0	0	0.8	1	0.2	0	0	0	0	0	0	1	1	13.2	1	0	2	2	0	1	1	0	55	2	2	1	0	14	0	0	0	365	0	0
1508	72	1	71	165	26.079	0	0	0	0	0	0	0.91	1.1	0.19	0	0	0	0	0	0	1	1	13	1	0	2	2	0	1	1	0	60	3	0	1	0	54	0	0	0	365	0	0
1509	50	0	79	150	35.1111	1	0	0	0	0	0	0.9	1.3	0.4	1	0	1	1	0	0	1	1	11.5	1	0	1	1	1	4	2	1	30	2	2	1	0	19	0	0	0	365	3	3
1510	74	1	75	175	24.4898	0	1	0	0	2	0	0.8	1.1	0.3	0	0	1	0	0	0	1	1	13.5	1	0	2	2	0	1	1	0	62	2	2	1	0	14	0	0	0	365	1	0
1511	51	1					2	0	1	2	0	0.9	1.2	0.3	0	0	0	0	0	0	1	1	14.5	1	1	2	1	1	1	1	0	60	1	0	0	0	10	0	0	0	365	0	0
1512	61	0	94	159	37.1821	1	1	0	1	2	0	0.5	0.5	0	0	0	0	0	0	0	1	1	15	0	1	2	3	0	1	1	0	60	3	0	0	0	6	1	0	0	365	0	0
1513	74	1	79	167	28.3266	0	1	0	1	2	0	0.86	1	0.14	0	0	0	0	0	0	1	1	15	0	1	2	3	0	1	1	0	65	2	2	2	0	3	0	0	0	365	0	0
1514	65	1	65	175	21.2245	0	0	0	0	0	0	0.9	1	0.1	0	0	0	1	0	0	1	1	15.2	1	1	2	1	1	4	2	1	35	2	0	2	1	25	0	0	1	0	2	0
1515	58	1	85	175	27.7551	0	0	0	1	0	0	0.7	1	0.3	1	0	1	0	0	0	1	1	11	0	0	2	1	1	1	2	1	35	2	2	2	0	11	0	0	0	365	1	0
1516	84	0	59	166	21.4109	0	0	0	1	0	0	1	1.4	0.4	0	0	1	0	0	0	1	1	13.2	1	1	2	2	0	1	1	0	0	1	0	2	0	6	0	0	0	365	1	0
1517	83	0	60	165	22.0386	0	0	0	1	0	0	0.7	0.8	0.1	0	0	0	0	0	0	1	1	13.7	1	1	2	2	0	1	1	0	50	2	1	1	0	23	0	97	1	97	0	0
1518	81	0	60	155	24.974	0	0	0	1	2	0	0.7	1.2	0.5	1	0	1	1	0	0	1	1	10.5	1	1	2	2	0	3	1	0	45	2	1	2	0	39	0	145	1	145	3	4
1519	43	1	80	178	25.2493	0	2	2	0	0	0	0.9	1	0.1	0	0	0	0	0	0	1	1	15.2	1	0	2	1	1	1	1	0	69	2	0	1	0	7	0	0	0	365	0	0
1520	58	1	71				1	0	1	0	1	1.2	2	0.8	0	0	1	0	0	0	3	1	15	1	1	2	1	1	1	1	0	45	2	2	1	0	14	1	0	0	365	1	0
1521	55	1	78	173	26.0617	0	2	0	0	0	0	0.5	0.8	0.3	0	0	1	0	0	0	1	1	15	0	0	1	3	0	1	1	0	60	3	0	1	0	45	0	0	0	365	1	0
1522	74	1	72	162	27.4348	0	1	0	1	2	0	0.87	1.1	0.23	0	0	0	0	0	0	1	1	13.4	0	1	1	3	0	1	1	0	50	2	2	1	0	7	0	0	0	365	0	0
1523	69	1	81	165	29.7521	0	0	0	0	2	0	0.7	1	0.3	0	0	1	0	0	0	1	1	14.4	0	1	2	3	0	1	1	0	55	2	2	2	0	3	0	0	0	365	1	0
1524	54	0	58	160	22.6562	0	2	0	1	0	0	0.7	1	0.3	1	0	1	0	0	0	1	1	10.8	1	0	2	2	0	1	1	0	45	2	2	1	0	4	0	0	0	365	1	0
1525	63	1	92	173	30.7394	1	2	0	1	0	0	0.8	1	0.2	0	0	0	0	0	0	1	1	12.9	0	0	2	3	0	1	1	0	0	2	1	1	0	7	0	0	0	365	0	0
1526	49	1	81	167	29.0437	0	0	0	0	0	0	0.9	1.1	0.2	0	0	0	0	0	0	1	1	13.4	1	1	2	1	1	1	1	0	45	1	0	0	0	9	0	34	1	34	0	0
1527	56	0	79	174	26.0933	0	2	0	0	0	0	0.6	1	0.4	0	0	1	0	0	0	1	1	15.2	1	0	2	2	0	1	1	0	0	2	1	2	0	8	0	0	0	365	1	0
1528	27	1	128	183	38.2215	1	0	0	1	0	0	0.8	1	0.2	0	0	0	0	0	0	1	1	15.7	1	1	2	1	1	1	1	0	55	1	0	1	0	7	0	0	0	365	0	0
1529	67	1	75	165	27.5482	0	0	0	1	2	0	0.8	1.2	0.4	1	1	1	1	0	0	1	1	12	1	1	2	2	0	3	1	0	60	3	0	1	0	14	0	0	0	365	3	3
1530	75	1	82	166	29.7576	0	0	0	0	0	0	0.9	1	0.1	0	0	0	0	0	0	1	1	13.5	1	0	2	1	1	1	1	0	60	3	2	1	0	13	0	0	0	365	0	0
1531	56	1	75	176	24.2123	0	2	0	0	0	0	1	1	0	0	0	0	0	0	0	1	1	15.7	1	0	2	1	1	1	1	0	65	2	2	1	0	15	0	0	0	365	0	0
1532	56	0	64	158	25.6369	0	0	0	1	0	0	0.7	1	0.3	0	0	1	0	0	0	1	1	12.3	0	0	2	3	0	1	1	0	62	2	2	1	0	13	0	0	0	365	1	0
1533	39	1	93	169	32.5619	1	0	2	1	2	0	0.68	0.8	0.12	0	0	0	0	0	0	1	1	15.9	1	1	2	1	1	1	1	0	65	1	0	1	0	7	0	0	0	365	0	0
1534	47	0	74	170	25.6055	0	0	0	0	0	0	0.6	0.7	0.1	0	0	0	0	0	0	1	1	12.7	0	1	2	2	0	1	1	0	60	1	0	2	0	33	0	0	0	365	0	0
1535	61	1	57	168	20.1956	0	0	0	1	0	0	0.9	1.1	0.2	0	0	0	0	0	0	1	1	15.1	1	1	2	1	1	1	1	0	65	3	0	1	0	33	0	0	0	365	0	0
1536	44	1	106	168	37.5567	1	2	0	1	0	0	1	1.1	0.1	0	0	0	0	0	0	1	1	16.5	1	0	2	1	1	1	2	1	40	2	2	1	0	8	0	0	0	365	0	0
1537	43	1	84	172	28.3937	0	1	0	0	0	0	1.1	1.4	0.3	0	0	0	0	0	0	1	1	17.4	0	1	2	3	0	1	1	0	67	2	1	1	0	6	0	0	0	365	0	0
1538	48	1	97	170	33.564	1	2	0	1	2	0	0.4	0.8	0.4	0	0	1	0	0	0	1	1	14.9	1	0	1	2	0	1	1	0	65	2	2	1	0	8	0	70	1	70	1	0
1539	58	1	86	167	30.8365	1	2	1	0	0	0	0.7	1.2	0.5	1	0	1	0	0	0	1	1	11.3	1	1	2	1	1	1	1	0	45	2	2	1	0	17	0	109	1	109	1	0
1540	78	0	55	154	23.1911	0	0	0	0	2	0	0.9	1.1	0.2	1	0	0	1	0	0	1	1	11.4	1	0	2	1	1	3	3	1	30	3	0	0	0	50	1	0	1	42	2	0
1541	51	1	85	176	27.4406	0	0	0	1	0	0	0.7	0.9	0.2	0	0	0	0	0	0	1	1	16	1	0	2	1	1	1	1	0	55	1	0	2	0	2	0	0	0	365	0	0
1542	35	0	75	172	25.3515	0	0	0	0	0	0	0.8	1.5	0.7	1	0	1	0	0	0	1	1	11.1	1	0	2	1	1	1	1	0	45	2	2	1	0	19	0	0	0	365	1	0
1543	80	0	40	155	16.6493	0	0	0	0	0	0	0.6	0.8	0.2	0	0	0	0	0	0	1	1	13.8	1	0	2	1	1	1	2	1	35	2	0	2	1	1	0	0	1	1	0	0
1544	49	1	75	168	26.5731	0	2	2	1	0	0	0.75	1.1	0.35	0	0	1	0	0	0	1	1	13	1	1	2	1	1	1	2	1	35	3	0	1	0	17	0	0	0	365	1	0
1545	46	1	65	170	22.4913	0	2	2	1	0	0	1.1	1.2	0.1	0	0	0	1	0	0	2	1	16.5	1	1	2	1	1	4	3	1	20	3	0	0	0	1	0	0	0	365	2	0
1546	46	1	120	166	43.5477	1	0	2	0	0	0	0.7	1	0.3	0	0	1	0	0	0	1	1	15	0	0	2	3	0	1	1	0	60	1	0	2	0	2	0	55	1	55	1	0
1547	90	0					0	0	1	0	1	1	1.6	0.6	1	0	1	0	0	0	1	1	11.4	1		2	2	0	1	1	0	65	1	0	0	0	8	1	163	1	163	1	0
1548	42	1	90	166	32.6608	1	2	2	1	2	0	0.9	0.9	0	0	0	0	0	0	0	1	1	15	0	1	2	3	0	1	1	0	0	1	0	2	0	10	0	0	0	365	0	0
1549	59	1	87	172	29.4078	0	0	0	1	2	0	0.6	1.1	0.5	0	0	1	0	0	0	1	1	14.4	1	1	2	1	1	1	1	0	45	1	0	1	0	11	1	0	0	365	1	0
1550	80	0	58	158	23.2335	0	0	0	1	0	0	0.78	1.2	0.42	0	0	1	0	0	0	1	1	14	1	1	2	2	0	1	1	0	67	2	2	1	0	7	0	0	0	365	1	0
1551	70	0					0	0	1	0	0	1.1	1.5	0.4	0	0	1	0	0	0	1	1	14.9	0	0	2	3	0	1	1	0	65	0	0	0	0	6	0	0	0	365	1	0
1552	56	1	75	175	24.4898	0	2	0	1	0	0	0.77	1	0.23	0	0	0	0	0	0	1	1	16.3	1	1	2	1	1	1	2	1	35	2	1	2	0	12	0	0	0	365	0	0
1553	67	1	87	174	28.7356	0	1	2	0	0	0	0.7	0.8	0.1	0	0	0	0	0	0	1	1	15.9	1	0	2	1	1	1	1	0	55	2	2	1	0	4	0	0	0	365	0	0
1554	49	1	84	171	28.7268	0	2	0	1	0	0	0.9	1.2	0.3	0	0	0	0	0	0	1	1	18.2	1	1	2	1	1	1	1	0	60	2	1	1	0	9	0	0	0	365	0	0
1555	79	0	75	158	30.0433	1	0	0	1	2	1	1.28	3.2	1.92	0	0	1	1	0	0	3	3	13.6	1	1	2	1	1	2	1	0	46	1	0	0	0	13	0	16	1	16	3	4
1556	57	1	96	177	30.6425	1	2	2	0	0	0	0.74	1.2	0.46	0	0	1	0	0	0	1	1	17.5	0	1	2	3	0	1	1	0	60	2	1	1	0	7	0	0	0	365	1	0
1557	100	1					0	0	0	0	0	0.89	1.3	0.41	1	0	1	0	0	0	1	1	11	1	0	2	2	0	1	1	0	65	1	0	2	0	6	1	0	1	334	1	0
1558	55	1	93	180	28.7037	0	2	0	0	0	0	0.5	0.9	0.4	0	0	1	0	0	0	1	1	16	1	1	2	1	1	1	2	1	40	2	2	1	0	9	0	0	0	365	1	0
1559	73	0	81	160	31.6406	1	0	0	1	2	0	0.59	0.8	0.21	0	0	0	0	0	0	1	1	12.9	0	1	1	3	0	1	0		0	2	2	1	0	2	0	0	0	47	0	0
1560	66	1	77	170	26.6436	0	1	0	0	0	0	1	1.08	0.08	0	0	0	0	0	0	1	1	15.8	0	1	2	3	0	1	1	0	60	3	0	1	0	27	0	0	0	365	0	0
1561	53	1	84	165	30.854	1	2	2	0	0	0	0.9	1.1	0.2	0	0	0	0	0	0	1	1	14	1	1	2	2	0	1	1	0	50	2	2	1	0	10	0	0	0	365	0	0
1562	46	1	91	174	30.0568	1	2	0	0	0	0	0.76	1.1	0.34	0	0	1	0	0	0	1	1	14.5	0	0	2	3	0	1	1	0	65	3	0	1	0	6	0	0	0	365	1	0
1563	51	1	86	169	30.111	1	1	0	1	0	0	0.7	1.1	0.4	0	0	1	0	0	0	1	1	15.1	1	1	2	2	0	1	1	0	65	3	0	1	0	9	0	0	0	365	1	0
1564	55	0	51	156	20.9566	0	2	0	0	0	0	0.6	0.8	0.2	0	0	0	0	0	0	1	1	15.6	1	0	2	2	0	1	1	0	60	2	2	1	0	6	0	0	0	365	0	0
1565	64	1					1	0	1	0	0	0.8	0.9	0.1	0	0	0	0	0	0	1	1	18	1	0	2	1	1	1	1	0	0	1	0	0	0	6	0	0	0	365	0	0
1566	74	0	80	160	31.25	1	0	0	1	0	0	0.5	0.6	0.1	0	0	0	0	0	0	1	1	12.6	1	1	2	2	0	1	1	0	60	2	1	2	0	5	0	0	0	365	0	0
1567	56	1	103	167	36.9321	1	1	0	1	0	0	0.8	1.1	0.3	1	0	1	0	1	0	1	1	9.4	1	1	2	2	0	1	1	0	55	2	2	2	0	10	0	0	0	365	1	0
1568	65	1	86	156	35.3386	1	1	0	1	2	0	1	1.4	0.4	0	0	1	0	0	0	1	1	15	0	1	2	3	0	1	1	0	65	2	2	1	0	6	0	0	0	365	1	0
1569	36	1	98	174	32.3689	1	2	2	0	0	0	0.8	1.2	0.4	0	0	1	0	0	0	1	1	17	1	0	2	1	1	1	2	1	35	2	2	1	0	7	0	0	0	365	1	0
1570	74	1					2	0	0	0	0	0.6	0.8	0.2	0	0	0	0	1	0	1	1	15.4	1	1	2	1	1	1	1	0	55	1	0	0	0	30	0	2	1	2	0	0
1571	46	1	97	172	32.788	1	2	1	1	0	0	1.2	1.9	0.7	0	0	1	1	0	0	1	1	13.8	1	1	2	2	0	3	2	1	40	2	2	1	0	6	0	0	0	365	3	4
1572	67	1	93	177	29.685	0	1	0	1	2	0	1.05	1.5	0.45	0	0	1	0	0	0	3	4	14.6	1	1	2	2	0	1	1	0	55	1	0	0	0	7	1	0	0	365	1	0
1573	36	1	87	165	31.9559	1	0	0	1	0	0	0.7	0.9	0.2	0	0	0	0	0	0	1	1	17.2	1	0	2	2	0	1	1	0	60	2	2	1	0	4	0	0	0	365	0	0
1574	61	1	109	191	29.8786	0	1	0	1	0	0	0.8	1.1	0.3	0	0	1	0	0	0	1	1	14.9	1	0	2	1	1	1	1	0	60	3	0	1	0	12	0	0	0	365	1	0
1575	48	1					1	0	1	2	0	0.7	1.1	0.4	0	0	1	1	0	0	1	1	13.9	1	1	2	2	0	3	1	0	48	2	2	1	0	5	0	0	0	365	3	4
1576	57	1	54	160	21.0937	0	2	0	0	0	0	0.6	0.8	0.2	0	0	0	0	0	0	1	1	14.3	1	0	2	1	1	1	2	1	35	2	2	2	0	12	0	0	0	365	0	0
1577	62	1	58	165	21.3039	0	2	0	0	0	0	1.1	1.7	0.6	1	0	1	0	0	0	1	1	11.5	1	1	2	1	1	1	1	0	45	2	1	1	0	8	0	0	0	365	1	0
1578	74	1	75	158	30.0433	1	0	0	1	0	0	0.9	1.1	0.2	0	0	0	1	0	0	1	1	14.3	1	0	2	1	1	2	1	0	60	2	0	2	0	10	0	0	0	365	2	0
1579	38	1	76	170	26.2976	0	0	0	0	0	0	0.86	1	0.14	0	0	0	0	0	0	1	1	15	0	0	2	3	0	1	1	0	60	1	0	1	0	4	0	0	0	365	0	0
1580	45	1	68	166	24.677	0	2	0	1	0	0	0.97	1.1	0.13	0	0	0	0	0	0	1	1	14.7	0	1	2	3	0	1	3	1	65	2	2	1	0	5	0	0	0	365	0	0
1581	89	0					0	0	0	0	0	0.7	0.9	0.2	0	0	0	1	0	1	1	1	15.3	1	0	2	2	0	2	1	0	57	1	0	0	0	6	1	203	1	203	2	0
1582	52	1	83	161	32.0204	1	0	0	0	0	0	0.94	1.1	0.16	0	0	0	0	0	0	1	1	14	1	1	2	2	0	1	1	0	62	2	1	1	0	6	0	0	0	365	0	0
1583	67	1	76	172	25.6896	0	0	0	0	0	0	0.6	0.8	0.2	0	0	0	0	0	0	1	1	14	1	0	2	2	0	1	1	0	65	2	0	2	0	8	0	0	0	365	0	0
1584	57	1	92	172	31.0979	1	1	0	1	2	1	1.4	1.8	0.4	0	0	1	0	0	0	1	1	14	0	1	2	3	0	1	1	0	65	1	0	1	0	11	0	160	1	160	1	0
1585	54	1	75	174	24.7721	0	2	0	0	0	0	0.6	0.8	0.2	0	0	0	0	0	0	1	1	15.4	0	0	2	3	0	1	1	0	65	3	0	1	0	7	0	0	0	365	0	0
1586	78	0	72	156	29.5858	0	0	0	1	0	0	0.7	1.3	0.6	0	0	1	0	0	0	1	1	13.6	1	1	2	1	1	1	1	0	50	3	0	0	1	38	0	0	1	38	1	0
1587	59	1	61	163	22.9591	0	1	2	0	0	0	0.9	1.2	0.3	0	0	0	0	0	0	1	1	16.2	1	0	2	1	1	1	1	0	50	2	2	1	0	8	0	0	0	365	0	0
1588	55	1	95	155	39.5421	1	1	0	0	0	0	1	1.2	0.2	0	0	0	0	0	0	1	1	13.7	1	0	2	1	1	1	1	0	0	2	0	2	0	8	0	0	0	365	0	0
1589	68	1	84	167	30.1194	1	0	0	1	0	1	1	1.4	0.4	0	0	1	0	1	0	1	1	15.5	1	1	2	1	1	1	2	1	40	2	2	1	0	5	0	351	1	351	1	0
1590	79	1					0	0	1	2	0	0.9	1.3	0.4	0	0	1	1	1	0	3	3	13.4	1	0	2	2	0	2	1	0	45	0	0	2	0	17	0	0	0	365	3	3
1591	68	1	73	169	25.5593	0	2	0	0	0	0	0.7	0.9	0.2	1	0	0	0	0	0	1	1	12.8	1	1	2	1	1	1	1	0	55	2	1	1	0	9	0	0	0	0	0	0
1592	84	0	64	168	22.6757	0	0	0	0	0	0	0.7	0.8	0.1	0	0	0	0	0	0	1	1	14.4	1	1	2	2	0	1	1	0	60	2	2	2	0	7	1	135	1	135	0	0
1593	52	1	76	175	24.8163	0	1	0	0	0	0	0.5	0.6	0.1	0	0	0	0	0	0	1	1	15.8	1	0	1	1	1	1	1	0	65	2	2	1	0	6	0	0	0	365	0	0
1594	40	1	85	175	27.7551	0	2	2	0	0	0	0.6	1	0.4	0	0	1	0	0	0	1	1	13.3	1	1	2	2	0	1	1	0	60	2	1	1	0	12	0	0	0	365	1	0
1595	47	1	78	159	30.8532	1	2	2	0	0	0	0.6	0.9	0.3	0	0	1	0	0	0	1	1	14	1	1	2	1	1	1	1	0	60	2	2	1	0	7	0	0	0	365	1	0
1596	53	1	93	174	30.7174	1	2	0	0	0	0	0.7	1.1	0.4	0	0	1	0	0	0	1	1	16.6	1	0	2	1	1	1	2	1	35	2	2	1	0	5	0	0	0	365	1	0
1597	65	1	91	176	29.3776	0	1	0	1	0	0	0.9	1.1	0.2	0	0	0	0	0	0	1	1	14.5	1	1	2	2	0	1	1	0	60	2	2	2	0	6	0	0	0	365	0	0
1598	66	1	70	187	20.0177	0	2	0	1	2	0	1.1	1.3	0.2	0	0	0	0	0	0	2	3	15.5	1	0	2	1	1	1	3	1	25	1	0	2	0	9	0	143	1	143	0	0
1599	66	1	85	170	29.4118	0	2	2	1	0	0	1.3	1.8	0.5	1	1	1	0	0	0	1	1	9.4	1	1	2	1	1	1	1	0	60	3	0	1	0	14	0	109	1	109	1	0
1600	74	0	86	153	36.738	1	1	0	1	2	0	1	1.7	0.7	1	0	1	0	0	0	5	1	11.3	0	1	2	3	0	1	1	0	65	3	0	1	0	23	0	0	0	365	1	0
1601	44	1	85	170	29.4118	0	0	0	1	0	0	0.7	1.4	0.7	0	0	1	1	0	0	1	1	16	1	0	2	1	1	4	2	1	35	2	0	2	1	11	0	0	1	11	3	4
1602	59	1	80	170	27.6817	0	2	0	0	0	0	0.7	1	0.3	0	0	1	0	0	0	2	1	14.2	1	0	2	1	1	1	1	0	50	2	1	2	0	10	0	0	0	365	1	0
1603	70	1	60	172	20.2812	0	1	0	0	0	0	1.2	1.9	0.7	0	0	1	1	1	1	1	1	15.5	1	0	2	1	1	4	3	1	0	1	0	0	1	6	0	0	1	6	3	4
1604	72	0	79	156	32.4622	1	0	0	1	2	0	0.6	0.63	0.03	0	0	0	0	0	0	1	1	14.8	1	1	2	2	0	1	1	0	55	2	1	1	0	4	0	0	0	365	0	0
1605	61	1	73	154	30.7809	1	1	2	1	0	0	0.7	1.2	0.5	0	0	1	0	0	0	1	1	16.5	1	1	2	2	0	1	1	0	0	3	0	1	0	23	0	0	0	365	1	0
1606	62	1	84	180	25.9259	0	2	0	0	2	0	0.9	1.1	0.2	0	0	0	0	0	0	1	1	16.4	0	0	2	3	0	1	1	0	0	2	1	1	0	7	0	0	0	365	0	0
1607	63	1	72	175	23.5102	0	2	0	0	0	0	0.8	1	0.2	0	0	0	0	0	0	2	2	13.1	1	0	1	1	1	1	1	0	61	2	1	1	0	7	0	0	0	365	0	0
1608	63	1	72	180	22.2222	0	2	0	1	2	0	0.7	1	0.3	1	0	1	0	0	0	1	1	11.8	1	1	2	2	0	1	2	1	40	2	2	1	0	7	0	0	0	365	1	0
1609	72	0	62	156	25.4767	0	0	0	0	0	0	0.7	0.9	0.2	0	0	0	0	0	0	1	1	15.7	1	1	2	1	1	1	2	1	30	1	0	2	0	14	0	0	0	365	0	0
1610	56	1	70	161	27.0051	0	1	2	0	0	0	0.9	1.3	0.4	0	1	1	0	0	0	3	2	15.2	0	0	2	3	0	1	1	0	62	1	0	0	0	9	0	146	1	146	1	0
1611	64	0	68	165	24.977	0	0	0	1	2	0	0.6	0.7	0.1	0	0	0	0	0	0	1	1	15	1	1	2	1	1	1	1	0	50	2	2	1	0	6	0	0	0	365	0	0
1612	65	1	78	168	27.6361	0	0	0	1	0	0	0.7	0.9	0.2	0	0	0	0	0	0	1	1	13.9	1	0	2	1	1	1	1	0	0	2	1	1	0	6	0	0	0	365	0	0
1613	51	1					1	0	0	0	0	0.5	0.83	0.33	0	0	1	0	0	0	1	1	16	1	0	2	1	1	1	1	0	0	1	0	0	0	7	0	0	0	365	1	0
1614	63	1	70	173	23.3887	0	1	0	1	0	0	0.7	0.9	0.2	0	0	0	0	0	1	1	1	14	1	1	2	1	1	1	1	0	50	2	2	1	0	6	0	0	0	365	0	0
1615	68	0	80	152	34.626	1	2	0	1	2	0	0.53	2.8	2.27	0	0	1	0	0	0	1	1	12.6	1	1	2	1	1	1	1	0	60	1	0	2	0	17	0	0	0	365	1	0
1616	66	0	68	156	27.9421	0	2	0	1	0	0	0.5	0.8	0.3	0	0	1	0	0	0	1	1	14.3	1	1	2	1	1	1	1	0	60	2	2	1	0	7	0	0	0	365	1	0
1617	40	1	111	175	36.2449	1	2	2	1	2	0	0.6	0.9	0.3	0	0	1	0	0	0	1	1	15	1	1	2	2	0	1	1	0	60	2	0	1	0	8	0	0	0	365	1	0
1618	42	1	76	178	23.9869	0	2	0	1	0	0	1.2	1.4	0.2	0	0	0	1	0	0	1	1	17.9	1	1	2	2	0	3	3	1	25	3	0	1	0	41	0	53	1	53	2	0
1619	44	0	79	169	27.6601	0	2	0	0	0	0	0.6	0.9	0.3	0	0	1	0	0	0	1	1	12.9	1	0	2	1	1	1	1	0	45	2	2	1	0	11	0	0	0	36	1	0
1620	37	1	82	173	27.3982	0	2	2	0	2	0	0.7	0.89	0.19	0	0	0	0	0	0	1	1	16.8	0	0	2	3	0	1	1	0	65	3	0	1	0	37	0	0	0	365	0	0
1621	73	0					0	0	0	2	0	0.56	0.8	0.24	0	0	0	0	0	0	1	1	14.7	0	1	2	3	0	1	1	0	65	2	1	1	0	4	0	0	0	365	0	0
1622	79	1	66	165	24.2424	0	0	0	0	0	0	0.8	1	0.2	0	0	0	1	0	0	3	0	15.3	1	1	2	1	1	2	2	1	35	2	1	1	1	9	0	0	1	9	2	0
1623	63	1					2	0	1	0	0	0.8	1.1	0.3	0	0	1	0	0	0	1	1	15.9	1	1	2	1	1	1	1	0	50	1	0	0	0	11	0	0	0	0	1	0
1624	54	1	93	176	30.0232	1	2	0	0	2	0	0.8	1.1	0.3	0	0	1	0	0	0	1	1	15.8	1	0	2	1	1	1	1	0	60	2	2	1	0	9	0	0	0	365	1	0
1625	83	0	68	160	26.5625	0	0	0	1	2	0	2.1	5	2.9	1	0	1	1	0	0	1	1	11.4	1	0	2	1	1	4	1	0	55	1	0	2	1	3	0	0	1	3	3	4
1626	43	1	113	173	37.756	1	2	2	1	2	0	0.8	1.1	0.3	0	0	1	1	0	0	1	1	13.4	1	1	2	1	1	3	1	0	55	2	2	1	0	10	0	0	0	365	3	3
1627	74	0	60	160	23.4375	0	0	0	1	2	0	0.9	1	0.1	0	0	0	0	0	0	1	1	16.7	1	1	2	2	0	1	1	0	60	2	2	1	0	10	0	0	0	365	0	0
1628	59	1	86	169	30.111	1	0	0	0	0	0	0.9	1	0.1	1	0	0	0	0	0	1	1	15.6	1	0	2	2	0	1	1	0	0	3	0	1	0	10	0	0	0	365	0	0
1629	87	1					0	0	1	0	0	0.98	1.1	0.12	0	0	0	1	0	0	1	1	14.7	1	0	2	2	0	2	1	0	50	1	0	2	0	13	1	0	1	33	2	0
1630	42	1	72	175	23.5102	0	2	0	0	0	0	0.9	1.1	0.2	0	0	0	0	0	0	1	1	16.1	1	0	2	2	0	1	1	0	55	1	0	1	0	7	0	0	0	365	0	0
1631	64	1	84	164	31.2314	1	0	0	1	2	0	1.1	1.2	0.1	0	1	0	1	0	0	1	1	13.7	1	1	2	1	1	3	0		0	1	0	2	1	1	0	0	1	1	2	0
1632	73	0	67	151	29.3847	0	0	0	1	0	0	0.58	0.6	0.02	0	0	0	0	0	0	1	1	15	0	1	2	3	0	1	1	0	65	3	0	1	0	16	0	0	0	365	0	0
1633	69	1	74	156	30.4076	1	1	0	1	2	0	0.87	1.1	0.23	0	0	0	0	0	0	1	1	13.9	0	0	2	3	0	1	1	0	0	2	1	1	0	5	0	0	0	365	0	0
1634	80	1	80	163	30.1103	1	1	0	1	0	0	1.1	1.1	0	0	0	0	0	0	0	1	1	15.3	1	0	1	1	1	1	2	1	30	2	0	2	0	15	0	0	0	365	0	0
1635	56	1	76	172	25.6896	0	2	0	0	0	0	0.8	1	0.2	0	0	0	0	0	0	1	1	15	1	1	2	2	0	1	1	0	65	2	2	1	0	5	0	0	0	365	0	0
1636	52	0	64	154	26.986	0	2	0	0	0	0	0.7	1	0.3	0	0	1	0	0	0	1	1	12.7	0	1	2	3	0	1	1	0	0	2	1	2	0	8	0	0	0	365	1	0
1637	76	1	68	170	23.5294	0	0	0	1	0	0	0.7	1	0.3	1	0	1	0	0	0	1	1	12.2	1	0	2	1	1	1	1	0	0	2	1	1	0	8	0	0	0	365	1	0
1638	74	1	90	174	29.7265	0	0	0	1	0	0	1.2	2	0.8	0	0	1	0	0	0	1	1	14	1	0	2	1	1	1	2	1	35	2	1	2	0	16	0	23	1	23	1	0
1639	60	1					0	2	1	0	0	0.9	1	0.1	0	0	0	0	0	0	1	1	16.5	1	0	2	2	0	1	1	0	60	1	0	2	0	6	0	0	0	365	0	0
1640	67	1					1	2	1	2	0	0.9	1.1	0.2	0	1	0	0	0	0	1	1	15.6	1	1	1	1	1	1	1	0	0	1	0	0	0	8	0	0	0	365	0	0
1641	60	0	73	159	28.8754	0	2	0	0	0	0	0.5	0.6	0.1	0	0	0	0	1	0	1	1	13	1	0	2	2	0	1	1	0	60	2	2	1	0	4	0	0	0	365	0	0
1642	82	0	80	152	34.626	1	0	0	1	0	0	0.6	2.6	2	0	0	1	1	0	0	1	1	13.4	1	0	2	2	0	2	1	0	60	2	1	2	0	12	0	0	0	365	3	4
1643	50	1	75	174	24.7721	0	2	0	0	0	0	0.7	0.7	0	0	0	0	0	0	0	1	1	15	1	0	2	2	0	1	1	0	60	1	0	1	0	5	0	0	0	365	0	0
1644	66	1	68	159	26.8977	0	2	0	0	0	0	0.7	0.9	0.2	0	0	0	0	0	0	1	1	15.4	0	1	2	3	0	1	1	0	65	2	2	1	0	6	0	0	0	365	0	0
1645	75	1	62	156	25.4767	0	0	2	0	0	0	0.98	1.2	0.22	1	0	0	1	0	0	1	1	12.1	1	0	1	1	1	2	1	0	45	2	1	1	0	15	0	0	0	365	2	0
1646	73	1	69	165	25.3444	0	2	0	0	0	0	0.8	1.1	0.3	0	0	1	0	0	0	1	1	15.3	1	0	1	1	1	1	1	0	55	2	1	2	0	12	0	0	0	365	1	0
1647	46	1	71	172	23.9995	0	2	1	0	0	0	0.7	1	0.3	0	0	1	0	0	0	1	1	17.5	1	1	1	1	1	1	1	0	45	2	2	1	0	7	0	0	0	365	1	0
1648	71	1	59	165	21.6713	0	2	2	1	0	0	1.1	2.3	1.2	0	0	1	0	0	0	1	1	16.1	1	1	2	1	1	1	1	0	45	2	1	1	1	9	0	0	1	9	1	0
1649	60	0	75	151	32.8933	1	0	0	1	2	0	0.5	0.7	0.2	0	0	0	0	0	0	1	1	13.4	1	1	2	1	1	1	1	0	0	2	2	1	0	10	0	0	0	365	0	0
1650	41	1	65	165	23.8751	0	2	0	0	0	0	0.8	0.9	0.1	0	0	0	0	0	0	1	1	14.8	0	0	2	3	0	1	1	0	58	1	0	1	0	6	0	0	0	365	0	0
1651	43	1	72	174	23.7812	0	2	0	0	0	0	0.7	0.9	0.2	0	0	0	0	0	0	1	1	14.7	1	0	2	1	1	1	1	0	45	2	2	1	0	8	0	0	0	365	0	0
1652	82	1	55	162	20.9572	0	1	0	1	0	0	0.9	1.2	0.3	1	1	0	0	0	0	2	1	11.5	0	1	2	3	0	1	1	0	50	3	0	1	0	17	1	0	1	238	0	0
1653	42	1	69	152	29.865	0	2	0	0	0	0	0.8	0.9	0.1	0	0	0	0	0	0	1	1	15.4	0	0	2	3	0	1	0		0	1	0	0	0	0	0	0	0	365	0	0
1654	61	1	74	180	22.8395	0	0	0	0	0	0	0.9	1	0.1	0	0	0	0	0	0	1	1	15.8	1	1	2	1	1	4	1	0	45	1	0	2	1	17	0	0	1	17	0	0
1655	81	1					0	0	1	0	0	0.83	1.1	0.27	0	0	0	1	0	0	1	1	16.6	1	1	2	1	1	2	3	1	25	0	0	0	0	13	0	0	0	365	2	0
1656	57	1	76	176	24.5351	0	2	0	0	0	1	0.9	1.4	0.5	0	0	1	0	0	0	1	1	15.6	1	0	2	1	1	1	1	0	45	2	2	1	0	17	0	0	0	365	1	0
1657	57	1	76	170	26.2976	0	2	0	0	0	0	0.7	0.9	0.2	0	1	0	1	0	0	4	2	13.1	1	0	2	2	0	2	1	0	60	1	0	2	0	8	0	0	0	365	2	0
1658	58	1	120	170	41.5225	1	1	0	1	0	0	0.7	1.1	0.4	0	0	1	0	0	0	1	1	14.7	0	0	2	3	0	1	1	0	65	2	2	1	0	4	0	0	0	365	1	0
1659	48	0	96	172	32.45	1	2	2	0	2	0	0.6	0.9	0.3	1	0	1	0	0	0	1	1	11	1	0	2	1	1	1	1	0	45	2	2	1	0	8	0	0	0	365	1	0
1660	86	1	83	172	28.0557	0	0	0	0	0	1	2	2.4	0.4	0	1	1	1	0	0	2	2	14.9	1	0	2	2	0	3	1	0	0	1	0	0	1	13	0	0	1	13	3	3
1661	52	1	90	172	30.4218	1	2	0	1	2	0	0.8	0.9	0.1	0	0	0	0	0	0	1	1	14.4	0	0	2	3	0	1	1	0	75	2	2	1	0	3	0	0	0	365	0	0
1662	51	1	77	175	25.1429	0	1	2	1	2	0	0.95	1.8	0.85	0	0	1	1	0	0	1	1	16.5	1	0	2	1	1	4	0		0	2	0	2	1	1	0	0	1	1	3	4
1663	78	0	55	157	22.3133	0	0	0	1	2	0	0.85	1	0.15	1	1	0	0	0	1	1	1	7.4	1	0	2	2	0	1	1	0	55	2	2	1	0	21	0	47	1	47	0	0
1664	74	0	116	153	49.5536	1	0	0	1	0	0	0.86	1.2	0.34	0	0	1	0	0	0	1	1	13.5	1	1	1	1	1	1	2	1	35	0	0	0	0	8	0	64	1	64	1	0
1665	85	1	70	170	24.2215	0	0	0	1	2	1	1.32	1.7	0.38	0	0	1	0	0	0	1	1	16.5	0	0	2	3	0	1	1	0	65	2	1	1	0	5	0	0	0	365	1	0
1666	61	1	70	164	26.0262	0	1	0	0	0	0	0.9	1	0.1	0	1	0	0	0	0	1	1	16.4	0	0	2	3	0	1	1	0	70	2	2	1	0	35	0	0	0	365	0	0
1667	57	1	80	174	26.4236	0	0	0	0	0	0	0.8	0.9	0.1	0	0	0	0	0	0	1	1	13.4	1	0	2	2	0	1	1	0	65	2	2	1	0	6	0	0	0	365	0	0
1668	54	0	90	158	36.0519	1	1	0	1	2	0	0.9	1	0.1	0	0	0	0	0	0	1	1	16	1	1	2	2	0	1	1	0	45	3	0	1	0	14	0	0	0	365	0	0
1669	77	1	50	153	21.3593	0	2	0	0	0	0	0.8	1.6	0.8	1	0	1	1	0	0	1	1	11.8	1	1	2	1	1	4	1	0	55	2	1	1	0	14	0	0	0	365	3	4
1670	71	1	85	165	31.2213	1	0	0	1	0	1	1.5	2.1	0.6	0	0	1	0	0	0	1	1	13.3	1	0	2	1	1	1	0		0	2	1	1	1	0	0	0	1	1	1	0
1671	48	1	91	172	30.7599	1	2	0	0	0	0	0.8	1	0.2	0	0	0	0	0	0	1	1	13.4	1	0	2	2	0	1	1	0	60	1	0	1	0	7	0	0	0	365	0	0
1672	54	1	80	168	28.3447	0	2	0	1	0	0	0.8	1.1	0.3	0	0	1	0	0	0	1	1	14.8	1	1	2	1	1	1	1	0	0	3	0	1	0	15	0	0	0	365	1	0
1673	77	0					0	2	1	2	0	0.7	1	0.3	0	0	1	0	0	0	1	1	16.3	1	0	2	2	0	1	1	0	0	1	0	0	0	7	0	184	1	184	1	0
1674	61	0	60	156	24.6548	0	0	0	1	0	0	0.83	1	0.17	1	0	0	0	0	0	1	1	10.5	0	0	2	3	0	1	1	0	0	1	0	2	0	26	0	0	0	365	0	0
1675	64	0	60	156	24.6548	0	0	0	1	0	0	0.7	1	0.3	0	0	1	0	0	0	1	1	13.8	1	1	2	1	1	1	2	1	30	2	2	1	0	24	0	0	0	365	1	0
1676	50	1	70	162	26.6728	0	2	0	1	0	0	0.6	1	0.4	0	0	1	0	0	0	1	1	14.3	1	1	2	2	0	1	1	0	65	2	1	1	0	4	0	0	0	365	1	0
1677	71	1	85	174	28.075	0	0	0	1	2	0	0.6	0.7	0.1	1	0	0	0	0	0	1	1	12.1	1	0	2	2	0	1	1	0	60	3	0	1	0	14	0	0	0	365	0	0
1678	56	1	78	170	26.9896	0	0	0	0	0	0	0.7	0.86	0.16	0	0	0	0	0	0	1	1	16.1	0	1	2	3	0	1	1	0	0	2	1	1	0	10	0	0	0	365	0	0
1679	68	1	90	166	32.6608	1	1	0	1	0	0	0.9	1.1	0.2	1	0	0	0	0	0	1	1	12.5	1	0	2	1	1	1	1	0	60	3	0	0	0	13	0	0	0	365	0	0
1680	55	1	76	171	25.9909	0	2	0	1	0	0	0.7	0.9	0.2	0	0	0	0	0	0	1	1	16	1	1	2	1	1	1	1	0	50	2	2	2	0	7	0	0	0	365	0	0
1681	67	1					0	0	0	0	0	1	1.4	0.4	1	0	1	0	0	0	1	1	11	1	0	2	1	1	1	2	1	35	2	2	1	0	5	0	0	0	365	1	0
1682	80	1	85	165	31.2213	1	1	0	1	0	1	1.5	3.4	1.9	0	0	1	0	0	0	1	1	13.2	1	1	2	1	1	1	2	1	35	2	2	1	0	49	0	0	0	365	1	0
1683	70	1	64	157	25.9645	0	2	2	1	2	1	0.7	1.5	0.8	0	0	1	0	0	0	2	1	18.4	1	1	2	1	1	1	1	0	50	3	0	0	0	18	1	0	0	365	1	0
1684	93	1					2	0	1	2	1	1.9	2.8	0.9	0	0	1	1	0	0	1	1	14.6	1	0	1	1	1	2	1	0	50	1	0	0	1	8	0	0	1	8	3	4
1685	76	1	100	173	33.4124	1	1	2	1	0	0	1	1.2	0.2	0	0	0	0	0	0	1	1	16.2	1	0	2	1	1	1	1	0	0	2	1	1	0	7	0	0	0	365	0	0
1686	48	1	59	163	22.2063	0	2	0	1	0	0	0.68	1.1	0.42	0	0	1	0	0	0	1	1	13.8	0	0	2	2	0	1	1	0	64	1	0	0	0	4	0	0	0	365	1	0
1687	73	0	64	160	25	0	0	0	1	2	0	0.8	1.3	0.5	0	0	1	1	0	0	1	1	12	1	0	1	1	1	4	3	1	25	3	0	2	1	2	0	0	1	2	3	4
1688	75	1	72	176	23.2438	0	0	2	1	0	0	0.7	1	0.3	0	0	1	0	0	0	3	3	14.7	1	0	2	1	1	1	1	0	45	1	0	0	0	5	0	0	0	0	1	0
1689	60	1	67	160	26.1719	0	0	0	1	0	0	1	1.2	0.2	0	0	0	0	0	0	2	3	14.9	1	0	2	2	0	1	1	0	45	3	0	0	0	30	0	0	0	365	0	0
1690	79	0	58	145	27.5862	0	0	0	1	0	0	0.8	1	0.2	0	0	0	0	0	1	1	1	12.7	0	1	2	3	0	1	1	0	75	3	0	1	0	7	0	0	0	365	0	0
1691	49	1	79	171	27.0169	0	2	0	0	0	0	0.9	1.2	0.3	0	0	0	0	0	0	1	1	15.4	1	1	2	1	1	1	1	0	60	2	2	1	0	6	0	0	0	365	0	0
1692	44	1	90	187	25.7371	0	2	0	0	0	0	0.7	1	0.3	0	0	1	0	0	0	2	1	13	0	1	2	3	0	1	1	0	55	2	1	1	0	4	0	0	0	365	1	0
1693	58	1	78	178	24.6181	0	2	0	1	0	0	0.98	1	0.02	0	0	0	0	0	0	1	1	14	0	1	2	3	0	1	1	0	68	2	2	1	0	6	0	0	0	365	0	0
1694	54	1	86	170	29.7578	0	1	0	0	0	0	0.75	0.87	0.12	0	0	0	0	0	0	1	1	15.2	1	0	2	2	0	1	1	0	0	2	2	1	0	11	0	0	0	365	0	0
1695	83	0					0	0	1	2	0	1.05	1.7	0.65	0	0	1	1	0	0	1	1	12.6	1	1	2	2	0	3	2	1	35	1	0	2	0	12	1	0	1	271	3	4
1696	71	1	82	165	30.1194	1	0	0	1	2	0	1	1.1	0.1	0	0	0	0	0	0	1	1	13.5	1	1	1	2	0	1	1	0	55	2	2	1	0	5	0	0	0	365	0	0
1697	50	1	118	177	37.6648	1	2	0	0	0	0	0.6	0.93	0.33	0	0	1	0	0	0	1	1	14.4	1	0	2	2	0	1	1	0	0	1	0	0	0	7	0	47	1	47	1	0
1698	74	1	87	162	33.1504	1	1	1	1	2	1	0.8	0.8	0	0	0	0	0	1	1	1	1	13.1	1	1	2	2	0	1	2	1	30	2	2	2	0	16	0	0	0	365	0	0
1699	54	1	104	180	32.0988	1	2	0	1	0	0	0.9	1.1	0.2	0	0	0	0	0	0	1	1	16.6	1	1	1	1	1	1	1	0	73	2	1	2	0	8	1	0	1	138	0	0
1700	64	1					0	0	1	0	0	0.8	1.8	1	0	0	1	1	0	0	1	1	14.5	1	1	2	1	1	2	1	0	55	1	0	0	0	12	0	0	0	365	3	4
1701	61	1	91	176	29.3776	0	1	0	0	2	0	1	1.3	0.3	0	0	1	0	0	0	1	1	15.3	1	1	2	1	1	1	1	0	35	1	0	1	0	5	0	0	0	365	1	0
1702	58	1	80	169	28.0102	0	1	0	1	2	0	0.8	1	0.2	0	0	0	0	0	0	1	1	14.2	1	1	2	1	1	1	1	0	55	2	2	1	0	15	0	0	0	365	0	0
1703	84	1	68	176	21.9525	0	0	0	0	0	1	1.5	2.01	0.51	1	0	1	1	0	0	1	1	12.3	0	0	1	3	0	3	1	0	50	3	0	0	0	26	1	0	0	365	3	4
1704	57	1					2	0	0	0	0	0.6	0.83	0.23	0	0	0	0	0	0	1	1	14.6	1	1	2	2	0	1	1	0	65	1	0	0	0	4	0	0	0	365	0	0
1705	48	1	90	178	28.4055	0	2	0	0	0	0	0.7	1	0.3	0	0	1	0	0	0	1	1	13.2	1	0	2	1	1	1	1	0	65	2	2	2	0	6	0	0	0	365	1	0
1706	57	1	90	166	32.6608	1	2	0	1	2	0	1.1	1.4	0.3	0	0	0	0	0	0	1	1	14	0	0	2	3	0	1	2	1	33	3	0	0	0	32	0	0	0	365	0	0
1707	49	1					1	0	0	0	0	0.6	0.8	0.2	0	0	0	0	0	0	1	1	14	1	0	2	2	0	1	1	0	60	1	0	0	0	10	0	0	0	365	0	0
1708	74	1	62	160	24.2187	0	0	0	0	0	0	0.8	1.3	0.5	0	0	1	0	0	0	1	1	13.8	1	0	2	1	1	1	1	0	55	1	0	0	0	9	1	0	0	365	1	0
1709	38	1	85	172	28.7317	0	2	0	0	0	0	0.7	1	0.3	0	0	1	0	0	0	1	1	14.8	1	1	2	1	1	1	2	1	40	2	2	1	0	8	0	0	0	365	1	0
1710	69	1	78	168	27.6361	0	0	0	1	0	0	0.8	1	0.2	0	0	0	0	0	0	2	1	12.6	1	1	2	2	0	1	1	0	55	3	0	1	0	33	0	0	0	365	0	0
1711	71	0	73	163	27.4756	0	0	0	1	2	0	0.56	0.8	0.24	0	0	0	0	0	0	1	1	13.3	1	1	2	1	1	1	1	0	55	2	2	2	0	7	0	0	0	365	0	0
1712	58	1	78	164	29.0006	0	2	0	1	0	0	0.6	0.8	0.2	0	0	0	0	0	0	1	1	16	0	0	2	3	0	1	1	0	65	2	2	2	0	3	0	0	0	365	0	0
1713	67	0	85	160	33.2031	1	2	0	1	0	0	0.7	1	0.3	0	0	1	0	0	0	1	1	16	1	0	2	2	0	1	2	1	35	1	0	0	0	16	0	0	0	365	1	0
1714	74	1					0	0	1	2	0	0.8	0.9	0.1	0	0	0	0	0	0	1	1	14.3	0	0	2	3	0	1	1	0	60	3	0	0	0	33	0	0	0	365	0	0
1715	47	0	70	160	27.3437	0	2	0	1	0	0	0.4	0.7	0.3	0	0	0	0	0	0	1	1	13.7	1	1	2	1	1	1	1	0	45	2	2	1	0	6	0	0	0	365	0	0
1716	57	1	90	187	25.7371	0	0	0	0	0	0	0.87	1	0.13	0	0	0	0	0	0	1	1	14	1	0	2	1	1	1	1	0	55	1	0	2	0	9	0	0	0	365	0	0
1717	51	1	75	170	25.9516	0	2	0	1	0	0	0.66	0.9	0.24	0	0	0	0	0	0	1	1	13.4	1	0	2	1	1	1	1	0	65	2	1	1	0	7	0	0	0	365	0	0
1718	57	1	100	170	34.6021	1	2	0	1	2	0	0.7	1	0.3	0	0	1	0	0	0	2	1	15	0	1	2	3	0	1	1	0	57	3	0	1	0	2	1	206	1	206	1	0
1719	60	1	82	164	30.4878	1	1	0	1	2	0	0.9	1.1	0.2	0	0	0	0	0	0	1	1	13.7	1	1	2	2	0	1	1	0	0	2	1	1	0	4	0	0	0	365	0	0
1720	57	0	90	170	31.1419	1	0	0	1	0	0	0.8	0.9	0.1	0	0	0	0	0	0	1	1	14	0	1	2	3	0	1	1	0	60	2	2	1	0	8	0	0	0	365	0	0
1721	81	0					0	0	1	0	0	0.9	0.9	0	0	0	0	0	0	0	1	1	14	0	0	2	3	0	1	1	0	60	1	0	2	0	7	0	0	0	365	0	0
1722	69	1	80	160	31.25	1	2	2	1	0	0	1	1.4	0.4	0	0	1	0	1	0	1	1	16.3	1	0	2	2	0	1	1	0	60	1	0	1	0	11	0	0	0	365	1	0
1723	75	0	69	167	24.7409	0	0	0	1	2	0	0.3	0.9	0.6	1	0	1	0	0	0	1	1	10.7	1	1	2	1	1	1	1	0	50	2	2	1	0	9	0	20	1	20	1	0
1724	41	1	78	173	26.0617	0	2	0	1	0	0	0.7	0.9	0.2	0	0	0	0	0	0	1	1	15.8	1	1	2	1	1	1	2	1	35	2	2	1	0	8	0	0	0	365	0	0
1725	76	1	76	155	31.6337	1	0	0	1	0	0	1	1.1	0.1	0	0	0	0	0	0	3	2	13.5	1	1	2	2	0	1	1	0	0	2	1	2	0	9	0	0	0	0	0	0
1726	56	0	75	155	31.2175	1	0	0	1	0	0	0.6	1	0.4	1	0	1	0	0	0	1	1	11.8	1	1	2	1	1	1	1	0	60	3	0	1	0	39	0	0	0	365	1	0
1727	85	0	99	170	34.2561	1	0	0	1	0	0	0.94	1.3	0.36	1	0	1	0	0	0	1	1	11	1	0	2	1	1	1	1	0	60	2	0	1	0	6	0	0	0	365	1	0
1728	68	1	75	167	26.8923	0	0	0	1	2	1	1.4	2.3	0.9	1	0	1	1	0	1	1	1	9.9	1	0	2	2	0	3	2	1	40	3	0	1	0	32	0	0	0	365	3	4
1729	79	1					2	2	0	0	0	0.8	1.3	0.5	0	0	1	0	0	0	1	1	14.3	1	0	1	1	1	1	2	1	40	0	0	0	0	8	1	0	0	365	1	0
1730	65	0	116	165	42.6079	1	0	0	1	2	0	0.98	2.5	1.52	1	0	1	0	0	0	1	1	10.8	1	1	2	1	1	1	1	0	60	3	0	0	0	12	0	0	0	365	1	0
1731	46	1	88	171	30.0947	1	1	0	0	0	0	0.7	1	0.3	0	0	1	0	0	0	5	1	16.7	0	1	2	3	0	1	1	0	70	2	2	1	0	1	0	0	0	365	1	0
1732	43	1	95	196	24.7293	0	2	0	0	0	0	0.55	1.1	0.55	0	0	1	0	0	0	1	1	14.2	1	0	2	1	1	1	1	0	0	2	2	1	0	17	0	0	0	365	1	0
1733	58	0	62	158	24.8358	0	2	0	1	2	0	0.2	0.8	0.6	0	0	1	0	0	0	1	1	13	1	1	2	1	1	1	1	0	65	3	0	1	0	20	0	0	0	365	1	0
1734	68	0	78	170	26.9896	0	0	0	1	2	0	0.6	0.8	0.2	1	0	0	0	0	0	2	3	10	1	1	2	2	0	1	1	0	60	1	0	2	0	20	0	0	0	365	0	0
1735	58	1	78	168	27.6361	0	2	0	1	2	0	0.6	0.82	0.22	0	0	0	1	0	1	2	4	14.9	1	1	2	2	0	2	3	1	25	1	0	0	0	7	0	0	0	0	2	0
1736	49	1	79	178	24.9337	0	2	0	0	0	0	0.7	1	0.3	0	0	1	0	0	0	1	1	16.6	0	0	2	3	0	1	1	0	0	3	0	0	0	15	0	0	0	0	1	0
1737	60	1	75	163	28.2284	0	2	0	1	2	0	1	1.2	0.2	0	0	0	0	0	1	1	1	18.2	0	1	2	3	0	1	1	0	58	1	0	2	0	7	0	0	0	260	0	0
1738	84	1	60	165	22.0386	0	1	0	0	0	1	2.3	2.6	0.3	1	1	1	1	0	0	1	1	12.9	1	0	2	1	1	4	0		0	2	2	2	1	1	0	0	1	1	3	3
1739	77	1	81	172	27.3797	0	1	0	1	2	1	1.4	2.1	0.7	1	1	1	1	0	0	1	1	12.1	1	0	1	1	1	3	1	0	0	1	0	0	0	9	0	0	0	0	3	4
1740	55	1					2	0	0	0	0	0.8	2	1.2	0	0	1	0	0	0	1	1	16.6	1	0	2	1	1	1	0		0	1	0	0	1	16	0	0	1	16	1	0
1741	64	1	87	171	29.7527	0	0	0	1	0	0	0.9	1.1	0.2	0	0	0	1	0	0	1	1	16.1	1	1	2	2	0	3	1	0	45	3	0	0	0	12	0	0	0	0	2	0
1742	53	1	80	169	28.0102	0	2	2	1	0	0	0.7	0.9	0.2	0	1	0	0	0	0	1	1	16.8	1	1	2	2	0	1	1	0	60	2	2	1	0	15	0	0	0	365	0	0
1743	73	1	90	175	29.3878	0	1	0	1	2	0	0.8	1.7	0.9	1	1	1	0	0	0	1	1	9.8	1	1	2	2	0	1	2	1	30	3	0	0	0	19	0	65	1	65	1	0
1744	77	0	95	160	37.1094	1	0	0	1	2	0	0.5	0.8	0.3	1	0	1	1	0	0	1	1	9.1	1	1	1	2	0	2	2	1	40	1	0	0	0	12	0	0	0	0	3	3
1745	52	1	90	173	30.0712	1	1	0	1	2	0	0.6	0.86	0.26	0	0	0	0	0	0	3	2	13.2	1	0	2	1	1	1	1	0	71	0	0	0	0	12	0	0	0	0	0	0
1746	76	1	96	180	29.6296	0	0	0	1	0	0	0.8	1	0.2	0	0	0	0	0	0	3	1	15.4	1	0	2	1	1	1	1	0	0	2	2	1	0	8	0	0	0	0	0	0
1747	79	0	53	144	25.5594	0	0	0	0	2	0	0.6	0.8	0.2	0	0	0	0	0	0	1	1	14.7	1	0	2	2	0	1	1	0	0	1	0	0	0	20	1	0	0	365	0	0
1748	82	0					0	0	1	0	1	2.2	4.9	2.7	1	0	1	1	0	0	1	1	11	1	1	1	1	1	3	3	1	25	1	0	0	0	23	0	0	0	0	3	4
1749	73	0					0	0	1	2	1	1.2	1.51	0.31	0	0	1	0	0	0	1	1	13	1	0	2	1	1	1	1	0	60	1	0	0	0	3	0	0	0	0	1	0
1750	36	1	95	182	28.6801	0	2	0	0	0	0	0.8	1.1	0.3	0	0	1	0	0	0	1	1	14.4	1	1	2	1	1	1	1	0	50	3	0	1	0	45	0	0	0	365	1	0
1751	76	0	63	169	22.0581	0	0	0	1	0	0	1.2	2.1	0.9	1	0	1	1	0	0	1	1	11	1	1	2	2	0	2	2	1	35	3	0	0	0	21	0	0	0	235	3	4
1752	63	0	70	170	24.2215	0	2	0	0	0	0	0.6	0.72	0.12	0	0	0	0	0	0	1	1	12.2	1	0	1	1	1	1	1	0	0	2	2	1	0	9	0	0	0	9	0	0
1753	59	1	115	176	37.1255	1	0	0	1	2	0	0.6	0.9	0.3	0	0	1	0	0	0	1	1	14.6	1	1	2	2	0	1	1	0	65	2	2	1	0	11	0	0	0	365	1	0
1754	72	0	70	160	27.3437	0	0	0	1	0	0	0.6	0.8	0.2	0	0	0	0	0	0	1	1	13.1	1	1	2	2	0	1	1	0	45	3	0	0	0	54	0	0	0	54	0	0
1755	60	1	64	172	21.6333	0	2	1	0	0	0	0.6	0.8	0.2	0	0	0	0	0	0	1	1	14.8	1	0	1	1	1	1	1	0	50	2	2	1	0	14	0	0	0	365	0	0
1756	46	1	97	166	35.201	1	1	0	1	0	0	0.68	1	0.32	0	0	1	0	0	1	3	2	15.9	1	1	2	1	1	1	1	0	55	2	1	2	0	9	0	0	0	365	1	0
1757	63	1	80	168	28.3447	0	1	2	1	0	0	0.7	0.9	0.2	0	0	0	0	0	0	1	1	13.6	1	0	1	1	1	1	1	0	55	2	2	1	0	6	0	0	0	0	0	0
1758	62	1	94	165	34.5271	1	1	0	0	0	0	0.9	1.1	0.2	0	0	0	1	0	0	1	1	16.2	1	0	1	1	1	3	1	0	55	2	1	1	0	7	0	0	0	365	2	0
1759	54	1					2	0	0	0	0	0.7	0.9	0.2	0	0	0	0	0	0	1	1	16.6	1	0	2	2	0	1	0		0	1	0	0	0	5	0	0	0	0	0	0
1760	49	1	98	186	28.327	0	1	2	1	0	0	0.7	1	0.3	0	0	1	0	0	0	1	1	14.7	1	1	2	2	0	1	1	0	0	2	1	1	0	8	0	0	0	365	1	0
1761	50	1	79	179	24.6559	0	2	0	0	0	0	0.9	1	0.1	0	0	0	0	0	0	1	1	16.9	1	1	1	1	1	1	1	0	60	2	2	1	0	8	0	0	0	365	0	0
1762	56	0					2	2	1	0	0	1.5	2.2	0.7	0	0	1	1	0	0	5	1	15.1	1	1	2	1	1	4	2	1	35	2	1	2	1	0	0	0	1	1	3	4
1763	49	1	73	167	26.1752	0	2	0	0	0	0	0.7	0.9	0.2	0	0	0	0	0	0	1	1	12.8	1	1	2	2	0	4	1	0	54	2	2	1	0	7	0	0	0	0	0	0
1764	44	1					0	0	0	0	0	0.7	1.1	0.4	0	0	1	0	0	0	1	1	16.5	1	0	1	1	1	1	2	1	36	0	0	0	0	6	0	0	0	0	1	0
1765	49	1	73	173	24.3911	0	1	2	0	0	0	0.9	1.1	0.2	0	0	0	0	0	0	1	1	13.6	1	0	2	2	0	1	2	1	40	2	2	1	0	7	0	0	0	365	0	0
1766	62	0	71	166	25.7657	0	2	0	1	0	0	0	0		0	0	0	0	0	0	1	1	0	1	0	0	1	1	1	1	0	55	1	0	0	0	7	0	0	0	365	0	0
1767	65	1	79	170	27.3356	0	2	0	1	0	0	1	1.3	0.3	1	0	1	0	0	0	3	1	12.6	1	0	2	1	1	1	1	0	60	2	2	1	0	5	0	17	1	17	1	0
1768	48	1	100	178	31.5617	1	2	2	0	0	0	0.7	1	0.3	0	1	1	0	0	1	2	1	15.4	1	1	2	1	1	1	1	0	50	2	1	1	0	11	0	0	0	233	1	0
1769	53	1	90	165	33.0579	1	2	0	1	0	0	0.7	1	0.3	0	0	1	0	0	0	1	1	15.1	1	0	2	1	1	1	1	0	0	1	0	0	0	9	1	2	1	2	1	0
1770	64	1	73	165	26.8136	0	2	2	1	2	0	0.7	1.1	0.4	0	0	1	0	1	0	0	1	14.9	0	1	2	3	0	1	2	1	35	0	0	2	0	6	0	0	0	0	1	0
1771	49	1	75	174	24.7721	0	1	0	0	0	0	1	1.3	0.3	0	0	1	0	0	0	1	1	14.2	1	0	2	1	1	1	1	0	65	2	2	1	0	7	0	0	0	0	1	0
1772	59	1					2	2	0	0	0	1.1	1.3	0.2	0	0	0	1	0	0	1	1	13.1	1	1	2	1	1	3	2	1	35	2	1	1	0	8	1	0	0	365	2	0
1773	39	1	80	180	24.6914	0	2	0	0	0	0	0.6	1.1	0.5	0	0	1	1	0	0	1	1	15.8	1	0	2	1	1	4	2	1	35	2	2	1	0	7	0	0	0	365	3	4
1774	62	1	100	184	29.5369	0	1	2	0	0	0	0.7	1	0.3	0	0	1	0	0	0	1	1	15	1	0	2	2	0	1	1	0	0	2	2	1	0	6	0	0	0	0	1	0
1775	71	0	75	160	29.2969	0	0	0	1	2	0	0.6	0.8	0.2	0	0	0	0	0	0	1	1	12.8	1	1	2	3	0	1	1	0	50	1	0	2	0	9	0	0	0	365	0	0
1776	69	1	84	178	26.5118	0	1	0	1	2	0	0.9	1.1	0.2	0	0	0	0	0	0	1	1	15	1	1	2	2	0	1	2	1	40	2	2	1	0	8	0	0	0	365	0	0
1777	73	1	80	182	24.1517	0	0	0	1	0	0	0.96	1.2	0.24	1	0	0	0	0	0	1	1	12.7	1	0	2	1	1	1	2	1	30	1	0	1	0	9	0	0	0	365	0	0
1778	61	1	90	180	27.7778	0	2	0	1	0	0	0.9	1.1	0.2	0	0	0	0	0	0	1	1	15.5	1	0	2	2	0	1	1	0	0	2	1	1	0	8	0	0	0	365	0	0
1779	48	1	75	175	24.4898	0	2	0	1	0	0	0.9	1.3	0.4	0	0	1	0	0	0	1	1	14.1	1	1	2	1	1	1	1	0	60	2	1	1	0	6	0	0	0	365	1	0
1780	73	1	72	170	24.9135	0	1	2	0	0	0	0.7	0.9	0.2	0	0	0	0	1	1	3	1	14	1	0	2	2	0	1	1	0	55	3	0	1	0	23	0	0	0	0	0	0
1781	58	1	92	180	28.3951	0	2	2	0	0	0	0.6	0.76	0.16	1	0	0	0	0	0	1	1	12.6	1	1	2	1	1	1	1	0	65	1	0	0	0	9	0	0	0	365	0	0
1782	62	1					2	2	1	0	1	3.6	4.5	0.9	0	0	1	0	0	0	1	1	15.7	1	0	2	1	1	1	1	0	58	1	0	0	0	7	0	126	1	126	1	0
1783	83	1	67	163	25.2174	0	1	0	0	0	0	0.7	1	0.3	0	0	1	0	0	0	2	3	16	1	0	2	1	1	1	3	1	25	1	0	0	0	43	0	0	0	0	1	0
1784	39	1	75	170	25.9516	0	0	0	0	0	0	1.1	2.1	1	0	0	1	1	0	0	1	1	13.6	1	0	2	1	1	4	0		0	2	0	0	1	6	0	0	1	6	3	4
1785	57	1	60	168	21.2585	0	0	0	0	0	0	1.3	3.1	1.8	0	0	1	0	0	0	2	2	16	1	0	2	1	1	1	1	0	50	3	0	0	0	13	0	0	0	0	1	0
1786	58	0	70	165	25.7117	0	0	0	1	0	0	0.9	0.9	0	0	0	0	1	0	0	1	1	13.6	1	0	1	1	1	4	0		0	2	0	1	1	0	0	0	1	1	2	0
1787	68	1	72	175	23.5102	0	1	0	1	2	0	0.9	1.2	0.3	0	0	0	0	0	0	3	3	14.3	1	1	2	1	1	1	1	0	65	3	0	2	0	34	0	0	0	38	0	0
1788	53	1	75	179	23.4075	0	2	2	0	0	0	0.9	1	0.1	0	0	0	0	0	0	1	1	14.9	1	0	2	2	0	1	1	0	0	1	0	2	0	2	0	0	0	365	0	0
1789	68	1	80	175	26.1224	0	0	2	0	0	0	0.9	1.1	0.2	1	0	0	1	0	0	2	2	11.9	1	1	2	1	1	4	3	1	25	2	1	1	0	35	0	0	0	0	2	0
1790	63	1	59	160	23.0469	0	2	0	0	0	0	0.7	1	0.3	0	0	1	0	0	0	1	1	16.1	1	0	1	1	1	1	2	1	30	3	0	0	0	1	0	0	0	365	1	0
1791	34	1	68	171	23.255	0	2	0	0	0	0	1	1	0	0	0	0	0	0	0	1	1	13.7	0	1	2	3	0	1	1	0	74	1	0	1	0	1	0	0	0	365	0	0
1792	79	1	61	166	22.1367	0	1	0	1	0	0	1.2	1.4	0.2	1	0	0	0	0	0	4	3	12.3	1	1	1	3	0	1	1	0	55	1	0	2	0	12	1	0	0	365	0	0
1793	63	1	70	176	22.5981	0	0	0	0	0	0	1	1.1	0.1	0	0	0	0	0	0	0	3	16.7	1	1	1	1	1	1	1	0	66	1	0	2	0	7	0	0	0	365	0	0
1794	55	1	75	165	27.5482	0	2	2	0	0	0	1.1	1.3	0.2	0	0	0	1	0	0	1	1	15	1	0	2	2	0	3	1	0	51	2	0	1	0	7	0	0	0	365	2	0
1795	62	0	72	143	35.2095	1	2	0	1	0	0	0.7	0.9	0.2	1	0	0	0	0	0	1	1	11.2	1	1	2	1	1	1	1	0	65	2	1	1	0	13	0	0	0	365	0	0
1796	68	1	70	175	22.8571	0	0	0	1	0	0	1	1.6	0.6	0	0	1	0	0	0	1	1	13.9	1	0	2	2	0	1	1	0	60	3	0	0	0	26	0	0	0	0	1	0
1797	70	0	82	160	32.0312	1	0	0	1	2	0	1	1.5	0.5	0	0	1	0	0	0	1	1	15.1	1	1	2	2	0	1	1	0	0	2	1	1	0	14	0	0	0	356	1	0
1798	77	0	77	156	31.6404	1	0	2	1	0	0	1.02	1.3	0.28	1	0	0	0	0	0	1	1	11.7	1	0	2	2	0	1	1	0	54	1	0	1	0	6	0	0	0	365	0	0
1799	66	1	80	167	28.6851	0	1	0	0	2	0	0.93	1	0.07	0	0	0	0	0	0	1	1	15.4	1	1	2	2	0	1	1	0	61	1	0	2	0	7	0	0	0	0	0	0
1800	62	0					0	0	1	2	1	2.5	2.9	0.4	1	1	1	1	0	0	2	3	9.8	1	1	2	2	0	4	1	0	53	1	0	0	0	7	0	0	0	0	3	3
1801	54	1	80	180	24.6914	0	2	2	0	0	0	0.8	1.6	0.8	0	0	1	0	0	0	1	1	17.7	1	0	2	1	1	1	1	0	55	2	1	1	0	12	0	0	0	0	1	0
1802	55	1	130	176	41.968	1	0	0	1	0	0	1.15	1.5	0.35	0	0	1	0	0	0	2	2	13.5	1	1	1	2	0	1	1	0	50	2	1	1	0	12	0	0	0	365	1	0
1803	71	0					0	0	1	0	0	0.6	0.8	0.2	0	0	0	0	0	0	1	1	14.4	1	1	2	2	0	1	1	0	60	1	0	0	0	6	0	0	0	0	0	0
1804	52	1	87	190	24.0997	0	0	0	0	0	0	0.8	0.9	0.1	0	0	0	0	0	0	1	1	14.8	1	0	1	1	1	1	2	1	35	2	1	1	0	8	0	0	0	0	0	0
1805	43	1	114	178	35.9803	1	0	0	0	0	0	0.9	1.1	0.2	0	0	0	0	0	0	1	1	15.8	1	1	2	1	1	1	1	0	65	2	2	1	0	5	0	0	0	365	0	0
1806	57	1	67	165	24.6097	0	1	0	0	0	0	0.8	1	0.2	0	0	0	0	0	0	1	1	14	1	0	2	2	0	1	1	0	0	2	2	1	0	4	0	0	0	365	0	0
1807	71	0	62	165	22.7732	0	0	0	1	0	0	0.5	0.7	0.2	0	0	0	0	0	0	1	1	14	1	1	2	2	0	1	1	0	60	3	0	0	0	8	0	0	0	0	0	0
1808	48	1	84	164	31.2314	1	2	0	1	0	0	0.9	1	0.1	0	0	0	0	0	0	1	1	14.6	1	1	2	1	1	1	1	0	55	1	0	0	0	8	0	4	1	4	0	0
1809	74	1	80	178	25.2493	0	1	0	0	0	0	0.9	1.1	0.2	1	1	0	1	0	0	1	1	11.7	1	1	2	2	0	3	1	0	60	3	0	0	0	6	0	0	0	0	2	0
1810	72	1	80	175	26.1224	0	2	0	0	0	0	1.2	1.45	0.25	1	1	0	1	0	0	1	1	11.8	1	1	2	2	0	3	3	1	30	3	0	0	0	8	0	0	0	0	2	0
1811	65	0	67	167	24.0238	0	0	0	1	0	0	0.6	0.8	0.2	0	0	0	0	0	0	1	1	12.3	0	0	2	3	0	1	1	0	65	2	1	1	0	19	0	0	0	365	0	0
1812	56	1					2	0	1	2	0	0.84	0.9	0.06	0	0	0	0	0	0	4	3	16.1	0	1	2	3	0	1	1	0	70	1	0	0	0	1	0	0	0	0	0	0
1813	83	1	80	166	29.0318	0	0	0	1	0	0	1.2	1.5	0.3	0	0	1	0	0	0	1	1	14.3	1	0	2	2	0	1	1	0	65	1	0	1	0	4	0	0	0	0	1	0
1814	43	1	72	169	25.2092	0	2	0	0	0	0	1	1.1	0.1	0	0	0	0	0	0	1	1	15.2	1	1	2	2	0	1	1	0	60	2	2	1	0	6	0	0	0	0	0	0
1815	39	1	67	176	21.6296	0	1	1	0	0	0	0.6	0.9	0.3	0	0	1	0	0	0	1	1	14.8	1	0	2	2	0	1	1	0	60	1	0	1	0	7	0	0	0	365	1	0
1816	50	1	83	186	23.9912	0	0	0	0	0	0	1	1.3	0.3	0	0	1	0	0	0	1	1	0	1	0	2	1	1	1	1	0	55	2	1	2	0	11	0	0	0	356	1	0
1817	58	1	70	169	24.5089	0	1	2	1	0	0	0.8	0.96	0.16	1	0	0	0	0	0	1	1	11.7	1	0	2	1	1	1	2	1	40	3	0	1	0	35	0	0	0	365	0	0
1818	77	1	71	158	28.441	0	1	0	0	0	0	1	1.1	0.1	0	0	0	0	0	0	1	1	14.6	1	0	2	2	0	1	1	0	60	1	0	2	0	3	0	0	0	365	0	0
1819	61	0	106	160	41.4062	1	0	0	1	0	0	0.79	0.9	0.11	1	0	0	0	0	0	1	1	11.6	1	1	2	1	1	1	0		0	2	2	1	0	10	0	0	0	365	0	0
1820	69	1	84	180	25.9259	0	0	0	1	0	0	0.7	1	0.3	1	0	1	1	0	0	2	1	12.3	1	1	1	2	0	2	2	1	30	3	0	0	0	9	0	0	0	0	3	3
1821	55	1	80	180	24.6914	0	1	0	0	2	0	0.9	1.4	0.5	0	0	1	1	0	0	2	3	14	1	1	2	2	0	3	3	1	20	2	0	2	1	6	0	0	0	6	3	4
1822	64	1					2	0	1	0	0	0.9	1.6	0.7	0	0	1	1	0	0	2	0	14.9	1	1	2	2	0	4	3	1	15	0	0	0	1	3	0	0	0	3	3	4
1823	60	0	50	163	18.8189	0	1	0	1	0	0	0.63	1.1	0.47	1	0	1	0	0	0	1	1	11.9	1	1	1	2	0	1	1	0	0	2	1	1	0	8	0	0	0	34	1	0
1824	83	1					1	0	0	0	0	1	4.7	3.7	0	0	1	0	0	0	1	1	13.3	1	0	2	1	1	1	2	1	40	1	0	0	0	10	0	0	0	2	1	0
1825	59	1	83	167	29.7608	0	1	0	0	0	0	1	1	0	1	0	0	0	0	0	1	1	10.4	1	0	2	1	1	1	1	0	55	2	2	1	0	11	0	0	0	365	0	0
1826	67	0	65	165	23.8751	0	0	0	1	0	0	0.7	1	0.3	1	0	1	1	0	0	1	1	10.7	1	1	2	2	0	2	1	0	65	2	2	1	0	10	0	0	0	365	3	3
1827	73	1	115	182	34.718	1	1	2	1	2	1	1.38	5.2	3.82	1	0	1	1	0	0	1	1	9.8	1	1	2	1	1	2	3	1	30	3	0	1	0	25	0	0	0	365	3	4
1828	65	0	80	170	27.6817	0	0	0	1	0	0	0.9	1	0.1	0	0	0	0	0	0	1	1	12.1	1	0	2	1	1	1	1	0	65	3	0	0	0	2	0	0	0	0	0	0
1829	75	1	53	164	19.7055	0	2	0	0	0	0	0.9	1	0.1	0	0	0	0	0	0	1	1	14.7	1	0	2	1	1	1	1	0	50	2	1	2	0	6	0	0	0	30	0	0
1830	65	1	80	175	26.1224	0	1	2	0	0	0	0.7	1.1	0.4	0	0	1	0	0	0	2	1	15	1	0	2	1	1	1	1	0	60	2	2	2	0	28	0	0	0	365	1	0
1831	82	0					0	0	1	0	0	1.18	1.2	0.02	0	0	0	1	0	0	1	1	13.5	0	1	2	3	0	3	1	0	75	0	0	0	0	12	0	0	0	365	2	0
1832	65	0	76	154	32.0459	1	0	0	0	0	0	0.59	0.7	0.11	0	0	0	0	0	0	1	1	12.2	1	0	2	2	0	1	1	0	60	1	0	1	0	4	0	0	0	0	0	0
1833	77	1	78	175	25.4694	0	0	0	0	0	0	1.1	1.5	0.4	0	0	1	0	0	0	1	1	14.1	1	0	2	1	1	1	2	1	35	3	0	1	0	25	0	0	0	0	1	0
1834	82	1					0	0	1	0	1	2	3.2	1.2	1	1	1	1	0	0	1	1	13	0	1	2	3	0	4	2	1	31	1	0	2	1	1	0	0	1	1	3	4
1835	57	1	75	177	23.9395	0	1	0	0	2	0	0.88	1.2	0.32	0	0	1	0	0	0	2	3	13.2	0	1	2	3	0	1	1	0	45	1	0	2	0	7	0	0	0	365	1	0
1836	48	1	85	170	29.4118	0	2	2	0	0	0	0	0		1	0	0	0	0	0	1	1	12.1	1	0	2	1	1	1	2	1	35	2	2	1	0	40	0	0	0	0	0	0
1837	58	1	67	165	24.6097	0	2	0	0	0	0	0.9	1.05	0.15	0	0	0	0	0	0	1	1	15.7	0	0	2	3	0	1	2	1	35	2	1	1	0	2	0	0	0	365	0	0
1838	59	1	80	170	27.6817	0	2	0	0	0	0	0.6	0.9	0.3	0	0	1	0	0	0	1	1	13	1	0	2	2	0	1	1	0	45	3	0	1	0	19	0	0	0	365	1	0
1839	66	1	77	167	27.6095	0	0	0	1	0	0	1	1.1	0.1	0	0	0	0	0	0	1	1	15.1	1	1	2	1	1	1	1	0	60	2	2	2	0	8	0	0	0	365	0	0
1840	46	0	64	156	26.2985	0	2	0	0	0	0	0.5	0.7	0.2	0	0	0	0	0	0	1	1	13.8	1	1	2	1	1	1	1	0	67	2	2	1	0	13	0	0	0	365	0	0
1841	56	1	82	174	27.0842	0	1	0	1	2	0	0.44	0.7	0.26	0	0	0	0	0	0	3	2	13.3	1	1	2	2	0	1	1	0	63	1	0	1	0	5	0	0	0	365	0	0
1842	72	1	78	165	28.6501	0	0	0	1	2	0	0.98	1.1	0.12	0	0	0	0	0	0	4	2	13.7	0	0	2	3	0	1	1	0	60	3	0	1	0	5	0	0	0	365	0	0
1843	72	1	78	171	26.6749	0	0	0	1	0	1	3	3.8	0.8	1	0	1	0	0	0	1	1	12.6	0	1	2	3	0	1	1	0	65	2	2	2	0	13	0	0	0	365	1	0
1844	62	1					1	0	1	0	0	0.97	0.97	0	0	0	0	0	0	0	3	2	14.2	0	1	2	3	0	1	1	0	50	3	0	0	0	24	0	0	0	365	0	0
1845	55	1	82	170	28.3737	0	1	0	0	0	0	0.8	1	0.2	0	0	0	0	0	0	1	1	14.1	1	1	2	1	1	1	2	1	35	2	2	1	0	7	0	0	0	365	0	0
1846	41	1	116	173	38.7584	1	1	0	1	0	0	1.05	1.4	0.35	0	0	1	0	0	0	1	1	16	0	0	2	3	0	1	1	0	65	3	0	1	0	15	0	0	0	365	1	0
1847	46	0	63	156	25.8876	0	2	0	0	0	0	0.58	0.58	0	0	0	0	0	0	0	1	1	13.4	0	0	2	3	0	1	1	0	0	3	0	1	0	5	0	0	0	365	0	0
1848	68	1					1	0	1	0	1	1.4	1.9	0.5	1	0	1	0	1	0	1	1	11.7	1	1	2	2	0	1	1	0	0	1	0	2	0	9	0	0	0	365	1	0
1849	46	0	64	161	24.6904	0	2	0	0	0	0	0.56	0.9	0.34	0	0	1	0	0	0	1	1	16	1	0	2	2	0	1	1	0	60	2	1	1	0	10	0	0	0	365	1	0
1850	63	0	85	168	30.1162	1	2	0	0	0	0	0.7	1.2	0.5	1	0	1	0	0	0	1	1	10.5	1	1	2	2	0	1	2	1	35	2	1	1	0	19	0	0	0	365	1	0
1851	62	1	74	173	24.7252	0	2	0	1	0	0	1	1.2	0.2	0	0	0	0	0	0	1	1	13.5	0	0	2	3	0	1	1	0	65	3	0	1	0	17	0	0	0	365	0	0
1852	48	1	84	171	28.7268	0	2	0	1	0	0	0.8	1	0.2	0	0	0	0	0	0	1	1	16.9	1	0	2	1	1	1	2	1	35	1	0	1	0	8	0	0	0	365	0	0
1853	58	0					2	0	0	0	0	0	0		0	0	0	0	0	0	1	1	13	1	0	2	1	1	1	1	0	58	1	0	0	0	11	0	0	0	0	0	0
1854	48	1	80	171	27.3588	0	2	0	0	0	0	1	1	0	0	0	0	0	0	0	1	1	15.4	1	0	2	2	0	1	0		0	2	1	1	0	2	0	0	0	365	0	0
1855	65	0	73	150	32.4444	1	0	0	1	2	0	0.9	1.7	0.8	1	0	1	0	0	0	1	1	10.4	1	1	2	1	1	1	2	1	31	1	0	2	0	32	0	0	0	0	1	0
1856	57	1	84	180	25.9259	0	2	2	1	2	1	0.9	1.4	0.5	0	0	1	0	0	0	1	1	15.4	1	1	1	1	1	1	2	1	40	2	2	1	0	8	0	0	0	365	1	0
1857	63	1	85	172	28.7317	0	2	0	0	2	0	0.8	1	0.2	0	0	0	0	0	0	1	1	15	1	0	2	2	0	1	1	0	60	2	2	2	0	16	0	0	0	84	0	0
1858	56	1	95	190	26.3158	0	0	0	0	0	0	1	1.4	0.4	0	0	1	0	0	0	2	0	13.9	1	0	2	2	0	1	3	1	0	2	2	2	0	4	0	0	0	0	1	0
1859	41	1	100	168	35.4308	1	2	0	1	2	1	1.2	1.5	0.3	0	0	1	0	0	0	1	1	14.5	1	0	2	2	0	1	1	0	65	2	2	1	0	9	0	0	0	0	1	0
1860	64	0					0	0	1	0	0	0.7	0.9	0.2	0	0	0	0	0	0	1	1	12.8	1	0	2	2	0	1	1	0	65	2	1	1	0	10	0	0	0	0	0	0
1861	72	1	80	180	24.6914	0	2	0	0	0	0	1.1	1.2	0.1	0	0	0	0	0	0	1	1	15	1	0	2	1	1	1	1	0	0	3	0	1	0	0	0	0	0	249	0	0
1862	78	1	80	176	25.8264	0	0	0	1	0	1	1.4	2	0.6	1	1	1	0	0	0	2	1	10.5	1	1	2	1	1	3	1	0	65	2	2	2	0	13	0	0	0	0	1	0
1863	62	1	84	171	28.7268	0	1	2	0	0	0	0.67	1	0.33	0	0	1	0	0	0	1	1	13.1	0	0	2	3	0	1	1	0	60	2	1	1	0	4	0	0	0	365	1	0
1864	74	1					1	0	1	0	0	0.95	1.1	0.15	1	0	0	0	1	0	1	1	11.2	1	1	2	2	0	1	1	0	60	3	0	1	0	6	0	0	0	0	0	0
1865	73	1	76	167	27.2509	0	1	0	1	0	0	0.5	1.4	0.9	1	0	1	0	0	0	1	1	10.6	1	1	2	2	0	1	1	0	65	2	2	1	0	7	0	0	0	365	1	0
1866	47	1	95	175	31.0204	1	0	2	0	0	0	1.8	2.5	0.7	0	0	1	1	0	0	1	1	18	1	0	2	1	1	4	2	1	30	2	2	1	1	4	0	0	1	4	3	4
1867	34	1					2	0	0	0	0	1	1.1	0.1	0	0	0	0	0	0	1	1	14.8	1	0	2	1	1	1	1	0	45	2	1	1	0	9	0	2	1	2	0	0
1868	65	1	74	175	24.1633	0	2	0	1	0	0	0.9	2.7	1.8	0	0	1	1	0	0	1	1	15	1	1	2	1	1	4	1	0	60	2	2	1	0	12	0	0	0	5	3	4
1869	63	1					2	0	0	0	0	0	0		0	1	0	0	0	0	3	3	15	0	0	2	3	0	1	1	0	65	1	0	0	0	5	0	0	0	365	0	0
1870	54	1	75	169	26.2596	0	2	0	0	0	0	0.5	0.89	0.39	1	0	1	0	0	0	1	1	11.5	1	0	1	1	1	1	1	0	55	3	0	0	0	40	0	0	0	365	1	0
1871	50	0					2	0	0	0	0	0.7	0.7	0	1	0	0	0	0	0	1	1	11.3	1	0	2	1	1	1	1	0	57	1	0	0	0	5	0	0	0	0	0	0
1872	51	1					2	0	0	0	0	0.7	1	0.3	0	0	1	1	0	0	1	1	13.4	1	0	2	1	1	4	1	0	50	1	0	0	0	16	0	0	0	0	3	3
1873	59	0					0	0	0	0	0	0.6	0.8	0.2	1	1	0	0	0	0	1	1	11.7	1	0	2	2	0	1	1	0	60	1	0	0	0	11	0	0	0	25	0	0
1874	41	1	100	176	32.2831	1	0	0	0	0	1	1.2	1.5	0.3	1	0	1	0	0	0	2	2	11.5	1	0	2	1	1	1	2	1	35	2	0	1	0	7	0	270	1	270	1	0
1875	60	1	85	180	26.2346	0	0	0	1	0	0	0.9	1.2	0.3	0	0	0	0	0	0	1	1	17	1	0	2	1	1	1	1	0	65	2	2	1	0	7	0	0	0	365	0	0
1876	45	0					0	0	1	0	0	1.3	1.9	0.6	1	0	1	0	0	0	1	1	11.5	1	0	2	1	1	1	2	1	35	1	0	2	1	10	0	0	1	10	1	0
1877	56	1	80	169	28.0102	0	1	1	0	0	0	0.9	1.4	0.5	0	0	1	0	0	0	2	2	13.5	1	0	2	2	0	1	1	0	40	3	0	0	0	10	0	0	0	0	1	0
1878	54	1	82	172	27.7177	0	2	2	0	0	0	0.7	1	0.3	0	0	1	0	0	0	1	1	14.7	1	0	2	1	1	1	1	0	60	1	0	1	0	10	0	0	0	0	1	0
1879	62	1					2	0	1	0	0	1.1	1.3	0.2	0	0	0	0	0	0	1	1	13.5	1	0	1	2	0	1	2	1	35	1	0	0	1	1	0	0	1	1	0	0
1880	66	1	75	168	26.5731	0	0	0	1	2	0	0	0		0	0	0	0	0	0	1	1	14	1	1	2	2	0	1	1	0	65	2	2	2	0	10	0	0	0	0	0	0
1881	64	0					0	0	1	0	0	0.9	1.2	0.3	0	0	0	0	0	0	1	1	12.1	1	1	2	2	0	1	1	0	65	1	0	2	0	36	0	0	0	0	0	0
1882	54	1	97	173	32.41	1	2	0	1	0	0	0.88	1.3	0.42	0	0	1	0	0	0	1	1	16	1	0	2	1	1	1	1	0	75	1	0	2	0	8	0	0	0	0	1	0
1883	51	1	83	169	29.0606	0	0	0	1	0	0	0.9	1.1	0.2	0	0	0	0	0	0	1	1	14.7	0	1	2	3	0	1	1	0	63	2	2	1	0	4	0	0	0	365	0	0
1884	62	1					2	0	1	2	0	0.8	0.8	0	1	0	0	1	0	0	1	1	9.8	1	0	1	1	1	3	1	0	60	1	0	0	0	3	0	0	0	0	2	0
1885	75	0	67	170	23.1834	0	0	0	1	2	0	1.5	2.1	0.6	0	0	1	1	0	0	1	1	13.4	1	0	2	1	1	4	3	1	25	2	2	2	1	8	0	0	1	8	3	4
1886	56	1	98	178	30.9304	1	2	0	0	0	0	0.96	1.1	0.14	0	0	0	0	0	0	1	1	14.9	0	1	2	3	0	1	1	0	62	2	2	1	1	1	0	0	1	1	0	0
1887	68	1	95	177	30.3233	1	2	0	0	0	0	0	0		0	0	0	0	0	0	1	1	16.1	1	1	2	2	0	1	1	0	65	2	2	1	0	5	0	0	0	365	0	0
1888	60	1	62	170	21.4533	0	2	2	1	0	0	0.9	1	0.1	0	0	0	1	0	0	1	1	14.6	1	0	2	1	1	2	3	1	25	3	0	1	0	34	0	0	0	365	2	0
1889	58	1	72	166	26.1286	0	1	0	0	0	0	1	1.2	0.2	0	0	0	0	0	0	1	1	15	1	0	2	1	1	1	1	0	45	2	1	2	0	11	0	15	1	15	0	0
1890	67	1	108	179	33.7068	1	2	2	0	0	0	0	0		0	0	0	0	0	0	1	1	15.3	1	0	2	2	0	1	1	0	72	2	2	1	0	9	0	0	0	0	0	0
1891	52	1	77	180	23.7654	0	0	0	1	0	0	0.8	1.4	0.6	0	0	1	0	0	0	1	1	16.1	1	0	2	1	1	1	1	0	45	2	1	2	1	26	0	0	0	26	1	0
1892	78	1	80	175	26.1224	0	0	0	0	0	0	0.9	1.3	0.4	0	0	1	0	0	0	3	2	14	1	0	2	1	1	1	1	0	60	2	1	2	0	5	0	0	0	0	1	0
1893	65	1	85	167	30.478	1	0	0	1	2	0	1	1.2	0.2	0	0	0	0	0	0	3	2	13.2	1	0	2	2	0	1	1	0	60	1	0	2	0	9	0	0	0	0	0	0
1894	54	0	75	175	24.4898	0	2	0	0	0	0	0.8	1.2	0.4	0	0	1	1	0	0	1	1	13.2	1	0	2	1	1	4	3	1	20	2	2	1	1	20	0	0	1	20	3	3
1895	52	1	81	180	25	0	2	2	1	0	0	0.9	1	0.1	0	0	0	0	0	0	1	1	14.1	1	0	2	1	1	1	1	0	60	2	2	1	0	9	0	0	0	365	0	0
1896	61	1	81	182	24.4536	0	0	0	1	0	1	1.2	1.6	0.4	0	0	1	0	0	0	1	1	14.9	1	0	2	2	0	1	1	0	0	1	0	2	0	19	0	0	0	0	1	0
1897	67	1	75	165	27.5482	0	2	0	0	0	1	0.88	1.8	0.92	0	0	1	1	0	0	1	1	13.1	1	0	2	1	1	2	1	0	50	3	0	1	0	10	0	0	0	365	3	4
1898	51	1	85	188	24.0493	0	2	0	0	0	0	0	0		0	0	0	0	0	0	1	1	14.5	1	0	2	1	1	1	1	0	50	2	1	1	0	6	0	0	0	0	0	0
1899	47	0	70	164	26.0262	0	0	2	1	0	0	0.9	1.1	0.2	0	0	0	0	0	0	1	1	14.4	1	1	2	1	1	1	1	0	45	2	2	1	0	4	0	0	0	0	0	0
1900	68	0	80	168	28.3447	0	0	0	1	2	0	0.99	1.3	0.31	1	0	1	0	0	0	0	2	11.3	1	0	2	2	0	1	1	0	0	2	2	1	0	7	0	0	0	365	1	0
1901	48	1	85	175	27.7551	0	2	0	1	2	0	0.8	1.3	0.5	0	0	1	0	0	0	1	1	15.6	1	0	2	1	1	1	1	0	60	2	2	1	0	8	0	0	0	0	1	0
1902	62	1	86	175	28.0816	0	0	0	1	0	0	0.9	1.4	0.5	0	0	1	0	0	0	0	2	14.9	1	0	2	1	1	1	1	0	45	2	2	1	0	5	0	0	0	0	1	0
1903	83	1					1	0	1	0	0	1.1	1.6	0.5	0	0	1	1	0	0	1	1	16	1	0	2	2	0	3	2	1	30	3	0	1	0	5	0	0	0	0	3	4
1904	36	1	91	178	28.7211	0	2	0	0	0	0	0.9	1	0.1	0	0	0	0	0	0	1	1	15	1	1	2	1	1	1	1	0	45	2	1	2	0	10	0	70	1	70	0	0
1905	57	1	75	170	25.9516	0	2	0	0	0	0	0.5	0.8	0.3	1	0	1	1	0	0	1	1	12	1	0	2	2	0	4	1	0	55	1	0	1	0	33	0	0	0	365	3	3
1906	53	1	80	186	23.1241	0	0	0	0	0	0	0.8	1	0.2	0	0	0	0	0	0	1	1	14	1	0	2	1	1	1	1	0	45	1	0	2	0	5	0	0	0	0	0	0
1907	63	1	80	185	23.3747	0	1	0	1	0	0	0.9	1.1	0.2	0	0	0	0	0	0	3	0	14.5	1	0	2	2	0	1	2	1	40	3	0	1	0	2	0	0	0	0	0	0
1908	60	1	89	166	32.2979	1	2	1	1	2	1	1.5	3.9	2.4	0	0	1	1	0	0	1	1	16	0	1	2	3	0	2	1	0	45	2	2	1	0	10	0	0	0	0	3	4
1909	80	1	75	180	23.1481	0	0	0	0	0	0	1	1.3	0.3	1	0	1	0	0	0	1	1	10	1	0	1	1	1	1	2	1	35	2	2	1	0	6	0	0	0	0	1	0
1910	70	1	75	185	21.9138	0	0	0	1	0	0	1.3	3.1	1.8	0	0	1	1	0	0	1	1	16.5	1	0	2	1	1	4	3	1	15	2	2	2	1	2	0	0	1	2	3	4
1911	50	1	78	196	20.304	0	2	2	0	0	0	0.7	1	0.3	0	0	1	0	0	0	1	1	13	1	0	2	1	1	1	1	0	55	2	1	1	0	6	0	0	0	0	1	0
1912	66	1	83	180	25.6173	0	2	0	1	0	0	0.8	1	0.2	0	0	0	0	0	0	1	1	13.8	1	0	2	2	0	1	1	0	65	2	0	2	0	6	0	0	0	0	0	0
